# Supplementary material for: A zinc/PyBisulidine catalyzed asymmetric Mannich reaction of N-tosyl imines with 3-acyloxy-2-oxindoles
Source: Royal Society of Chemistry journal article supplement (doi:10.1039/d1ob01328a), 2021-01-01

Supporting Information for:

## **Zinc/PyBisulidine Catalyzed Asymmetric Mannich Reaction of *N*-Tosyl Imines with 3-Acyloxy-2-Oxindoles**

Zinan Yang,<sup>a</sup> Huakang He,<sup>a</sup> Rui Tian,<sup>a,b</sup> Ruoran Wu,<sup>a</sup> Sheng Hu,<sup>a,c</sup> Yue Wu<sup>a,\*</sup> and Hui Zhou<sup>a,\*</sup>

*hzhou@cqmu.edu.cn (H. Zhou); wuyue511@cqmu.edu.cn (Y. Wu)*

<sup>a</sup> *Chongqing Research Center for Pharmaceutical Engineering, College of Pharmacy, Chongqing Medical University, Chongqing 400016, China*

<sup>b</sup> *Pharmaceutical Teaching Laboratory Center, Chongqing Medical University, Chongqing, China*

<sup>c</sup> *Department of hepatobiliary surgery, Chongqing 4th hospital, Chongqing, China*

### **CONTENTS**

|                                                      |     |
|------------------------------------------------------|-----|
| 1. Other optimizations of the Mannich reaction ..... | S2  |
| 2. Crystal data and structure refinement .....       | S4  |
| 3. Copies of HPLC.....                               | S6  |
| 4. Copies of NMR Spectra.....                        | S36 |

## 1. Other optimizations of the Mannich reaction

**Table S1:** The effects of different solvents.<sup>a</sup>

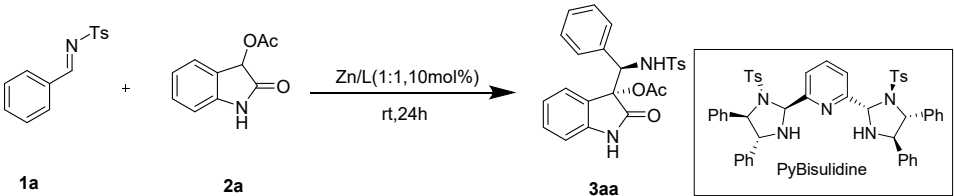

| Entry | Solvent                         | Yield (%) <sup>b</sup> | <i>dr</i> <sup>c</sup> | <i>ee</i> (%) <sup>d</sup> |
|-------|---------------------------------|------------------------|------------------------|----------------------------|
| 1     | 2-Me-THF                        | 50                     | 15:1                   | 97                         |
| 2     | THF                             | 34                     | 15:1                   | 97                         |
| 3     | AcOEt                           | 38                     | 24:1                   | 98                         |
| 4     | Toluene                         | 37                     | 25:1                   | 96                         |
| 5     | CH <sub>2</sub> Cl <sub>2</sub> | 29                     | 4:1                    | 71                         |
| 6     | 1,4-dioxane                     | 25                     | 22:1                   | 95                         |

<sup>a</sup>All reactions were performed with Zn(acac)<sub>2</sub>/L (1:1, 10 mol%), **1a** (0.1 mmol), **2a** (0.1 mmol), solvent (1 mL), at rt for 24 h. <sup>b</sup>Isolated yield. <sup>c</sup>Determined by HPLC. <sup>d</sup>Enantiomeric excess values of major diastereomers; Determined by chiral HPLC.

**Table S2:** Effects of the temperature and the ratio of **1a/2a**.<sup>a</sup>

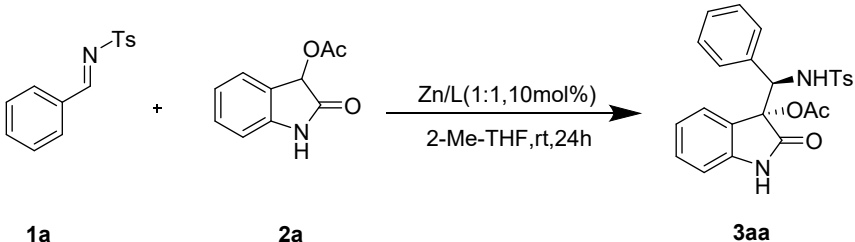

| Entry          | The amount of <b>1a</b> (mmol) | The amount of <b>2a</b> (mmol) | Yield (%) <sup>b</sup> | <i>dr</i> <sup>c</sup> | <i>ee</i> (%) <sup>d</sup> |
|----------------|--------------------------------|--------------------------------|------------------------|------------------------|----------------------------|
| 1              | 0.1                            | 0.12                           | 55                     | 15:1                   | 98                         |
| 2              | 0.1                            | 0.14                           | 44                     | 13:1                   | 99                         |
| 3              | 0.1                            | 0.2                            | 66                     | 10:1                   | 97                         |
| 4              | 0.12                           | 0.1                            | 40                     | 8:1                    | 98                         |
| 5              | 0.14                           | 0.1                            | 43                     | 9:1                    | 98                         |
| 6              | 0.2                            | 0.1                            | 30                     | 13:1                   | 97                         |
| 7 <sup>e</sup> | 0.1                            | 0.12                           | 40                     | 12:1                   | 99                         |
| 8 <sup>f</sup> | 0.1                            | 0.12                           | 58                     | 10:1                   | 94                         |

<sup>a</sup> Unless otherwise noted, the reactions were performed with Zn(acac)<sub>2</sub>/L (1:1, 10 mol%), 2-Me-THF (1 mL), at rt for 48 h. <sup>b</sup>Isolated yield. <sup>c</sup>Determined by HPLC. <sup>d</sup>Enantiomeric excess values of major diastereomers; Determined by chiral HPLC. <sup>e</sup>At 0 °C. <sup>f</sup>At 40 °C.

**Table S3:** The effect of additive.<sup>a</sup>

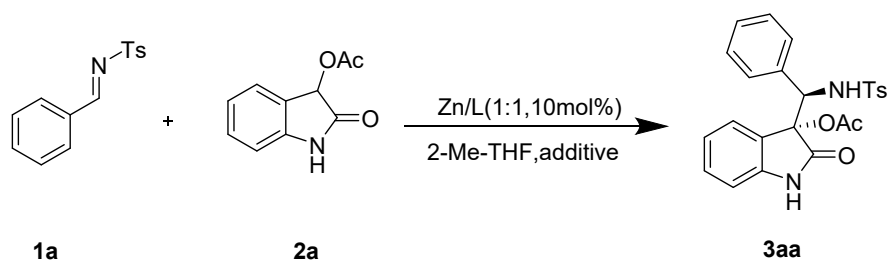

| Entry           | Additive                    | The amount of additive | Yield (%) <sup>b</sup> | <i>dr</i> <sup>c</sup> | <i>ee</i> (%) <sup>d</sup> |
|-----------------|-----------------------------|------------------------|------------------------|------------------------|----------------------------|
| 1               | none                        | -                      | 55                     | 15:1                   | 98                         |
| 2               | <i>N</i> -methyl morpholine | 20 mmol%               | 54                     | 15:1                   | 98                         |
| 3               | DIPEA                       | 20 mmol%               | 33                     | 15:1                   | 87                         |
| 4               | Et <sub>3</sub> N           | 20 mmol%               | 46                     | 7:1                    | 98                         |
| 5               | 4-Methylphenol              | 20 mmol%               | 39                     | 15:1                   | 98                         |
| 6               | 3Å MS                       | 3 mg                   | 54                     | 11:1                   | 98                         |
| 7               | 4Å MS                       | 3 mg                   | 40                     | 15:1                   | 97                         |
| 8               | 5Å MS                       | 3 mg                   | 72                     | 15:1                   | 99                         |
| 9               | 5Å MS                       | 30 mg                  | 73                     | 15:1                   | 99                         |
| 10 <sup>e</sup> | 5Å MS                       | 30 mg                  | 94                     | 15:1                   | 97                         |
| 11 <sup>e</sup> | 5Å MS                       | 45 mg                  | 76                     | 6:1                    | 96                         |

<sup>a</sup>Unless otherwise noted, the reactions were performed with Zn(acac)<sub>2</sub>/L (1:1, 10 mol%), **1a** (0.1 mmol), **2a** (0.12 mmol), 2-Me-THF (1 mL), at rt for 24 h. <sup>b</sup>Isolated yield. <sup>c</sup>Determined by HPLC. <sup>d</sup>Enantiomeric excess values of major diastereomers; Determined by chiral HPLC. <sup>e</sup>At rt for 48 h.

## 2. Crystal data and structure refinement

**Preparation of the single crystals of enantiopure 3aa:** Compound **3aa** (20.0 mg, 20:1 dr, 98% ee) was dissolved in ethyl acetate (0.5 mL), then followed by the slowly addition of petroleum ether until a solid just appeared. Shaked the tube to make the solution clear. The tube was sealed, thus allowing slow evaporation of the solvents at room temperature. After a week, several small particles could be observed at the bottom of the tube. The crystals were chosen and subjected to the single crystal X-ray diffraction analysis for the determination of the absolute configuration of **3aa**. The data were collected by a Rigaku Gemini equipped with a Cu radiation source ( $K\alpha = 1.54184 \text{ \AA}$ ) at 293(2) K. CCDC 2085480 (**3aa**) contains the supplementary crystallographic data for this paper. These data can be obtained free of charge via [www.ccdc.cam.ac.uk/data\\_request/cif](http://www.ccdc.cam.ac.uk/data_request/cif).

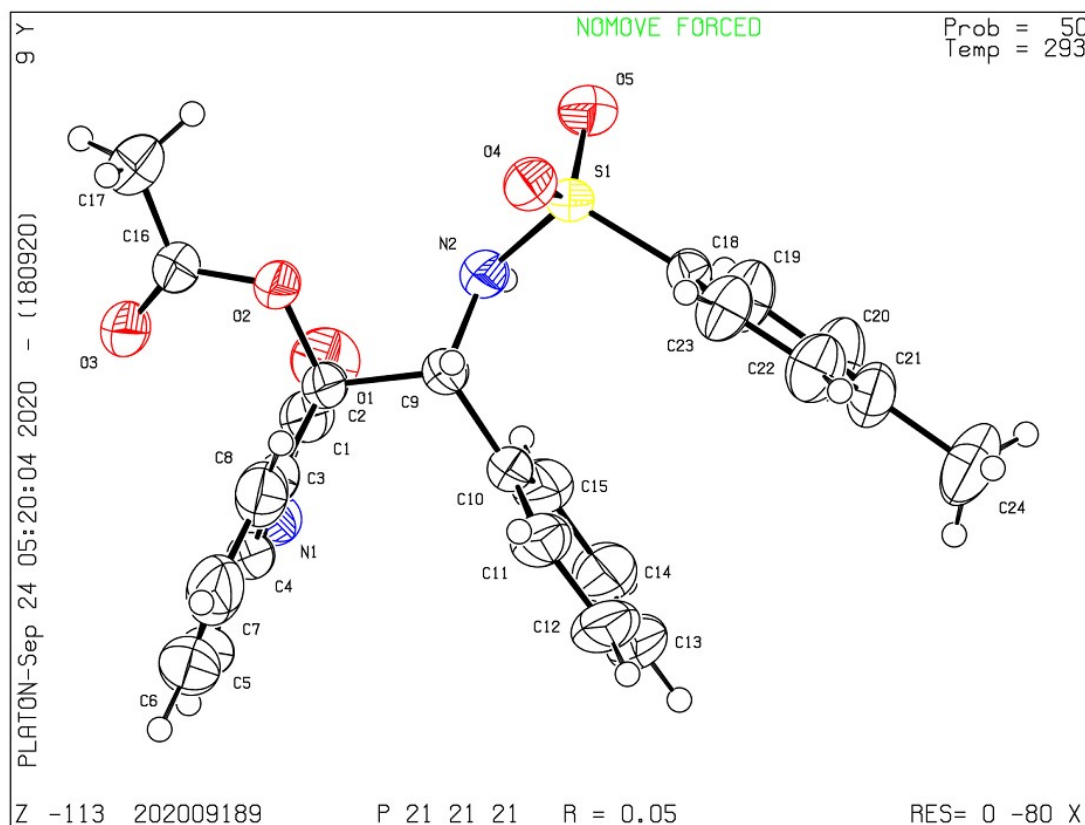

(ellipsoid contour probability 30%)

Table S4. Crystal data and structure refinement for 202009189 (**3aa**).

|                     |                       |
|---------------------|-----------------------|
| Identification code | 202009189             |
| Empirical formula   | $C_{24}H_{22}N_2O_5S$ |
| Formula weight      | 450.49                |
| Temperature/K       | 293(2)                |
| Crystal system      | orthorhombic          |

|                                             |                                                                |
|---------------------------------------------|----------------------------------------------------------------|
| Space group                                 | P2 <sub>1</sub> 2 <sub>1</sub> 2 <sub>1</sub>                  |
| a/Å                                         | 9.42743(15)                                                    |
| b/Å                                         | 9.8509(2)                                                      |
| c/Å                                         | 24.0927(4)                                                     |
| $\alpha$ /°                                 | 90                                                             |
| $\beta$ /°                                  | 90                                                             |
| $\gamma$ /°                                 | 90                                                             |
| Volume/Å <sup>3</sup>                       | 2237.46(7)                                                     |
| Z                                           | 4                                                              |
| $\rho_{\text{calc}}$ /cm <sup>3</sup>       | 1.337                                                          |
| $\mu$ /mm <sup>-1</sup>                     | 1.610                                                          |
| F(000)                                      | 944.0                                                          |
| Crystal size/mm <sup>3</sup>                | 0.14 × 0.1 × 0.09                                              |
| Radiation                                   | CuK $\alpha$ ( $\lambda$ = 1.54184)                            |
| 2 $\Theta$ range for data collection/°      | 7.338 to 134.116                                               |
| Index ranges                                | -11 ≤ h ≤ 7, -11 ≤ k ≤ 10, -28 ≤ l ≤ 28                        |
| Reflections collected                       | 8071                                                           |
| Independent reflections                     | 3985 [ $R_{\text{int}}$ = 0.0367, $R_{\text{sigma}}$ = 0.0559] |
| Data/restraints/parameters                  | 3985/0/295                                                     |
| Goodness-of-fit on F <sup>2</sup>           | 1.036                                                          |
| Final R indexes [ $I \geq 2\sigma(I)$ ]     | $R_1$ = 0.0499, $wR_2$ = 0.1299                                |
| Final R indexes [all data]                  | $R_1$ = 0.0561, $wR_2$ = 0.1372                                |
| Largest diff. peak/hole / e Å <sup>-3</sup> | 0.28/-0.25                                                     |
| Flack parameter                             | 0.07(3)                                                        |

### 3. Copies of HPLC

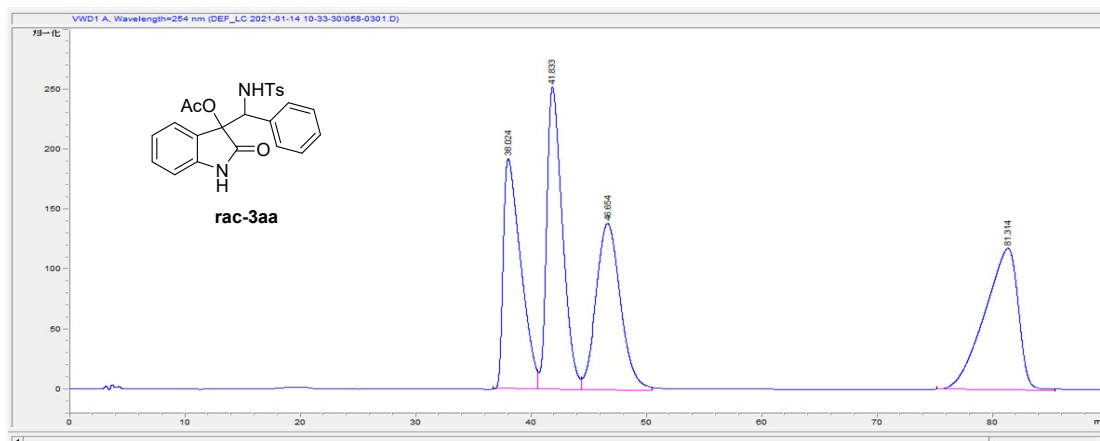

| Peak# | Retention Time | Area      | Area%   |
|-------|----------------|-----------|---------|
| 1     | 38.04          | 2.00101e4 | 22.6617 |
| 2     | 41.833         | 2.37290e4 | 26.8734 |
| 3     | 46.654         | 2.05981e4 | 23.3276 |
| 4     | 81.313         | 2.39621e4 | 27.1373 |

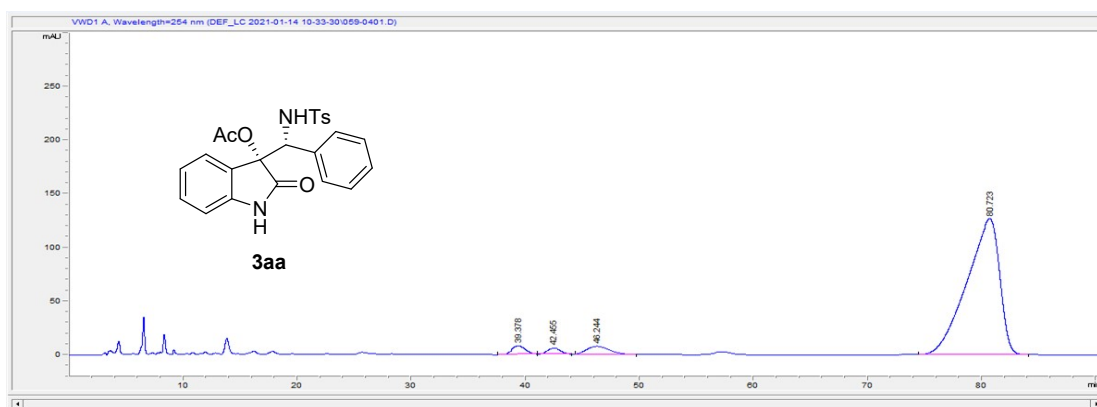

| Peak# | Retention Time | Area       | Area%   |
|-------|----------------|------------|---------|
| 1     | 39.378         | 755.83234  | 2.6972  |
| 2     | 42.455         | 438.55524  | 1.5650  |
| 3     | 46.244         | 1027.25305 | 3.6658  |
| 4     | 80.723         | 2.58013e4  | 92.0721 |

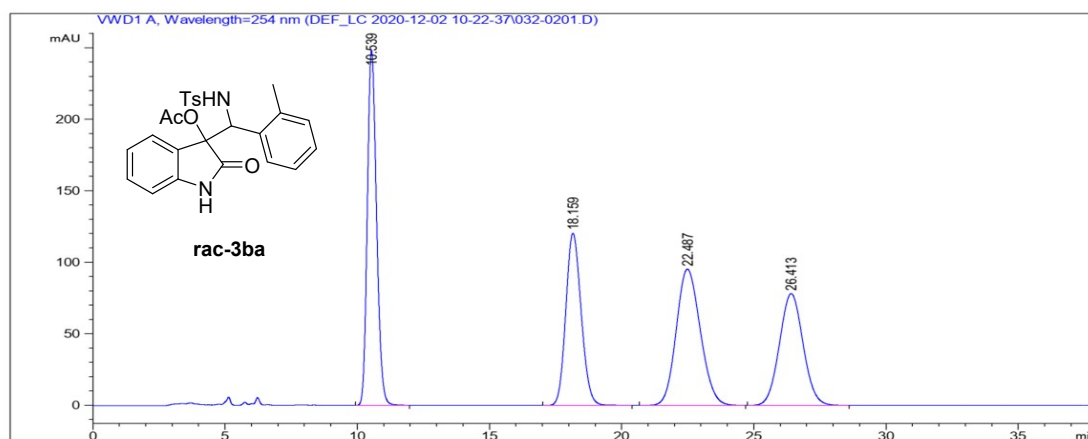

| Peak# | Retention Time | Area       | Area%   |
|-------|----------------|------------|---------|
| 1     | 10.539         | 6008.21338 | 27.6389 |
| 2     | 18.159         | 4858.50684 | 22.3500 |
| 3     | 22.487         | 6024.83691 | 27.7154 |
| 4     | 26.413         | 4846.69434 | 22.2957 |

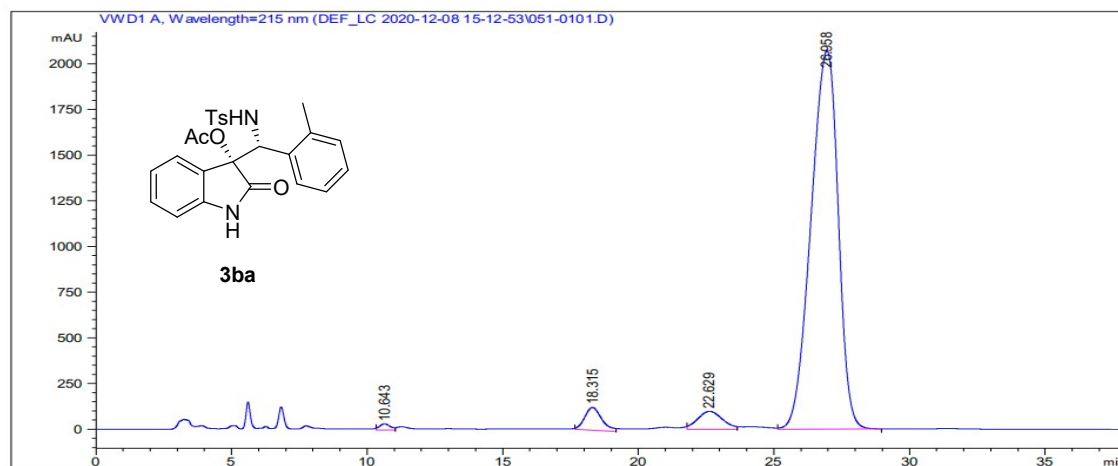

| Peak# | Retention Time | Area       | Area%   |
|-------|----------------|------------|---------|
| 1     | 10.643         | 933.87533  | 0.5950  |
| 2     | 18.315         | 5368.28467 | 3.4223  |
| 3     | 22.629         | 6194.30225 | 3.9489  |
| 4     | 26.958         | 144364     | 92.0337 |

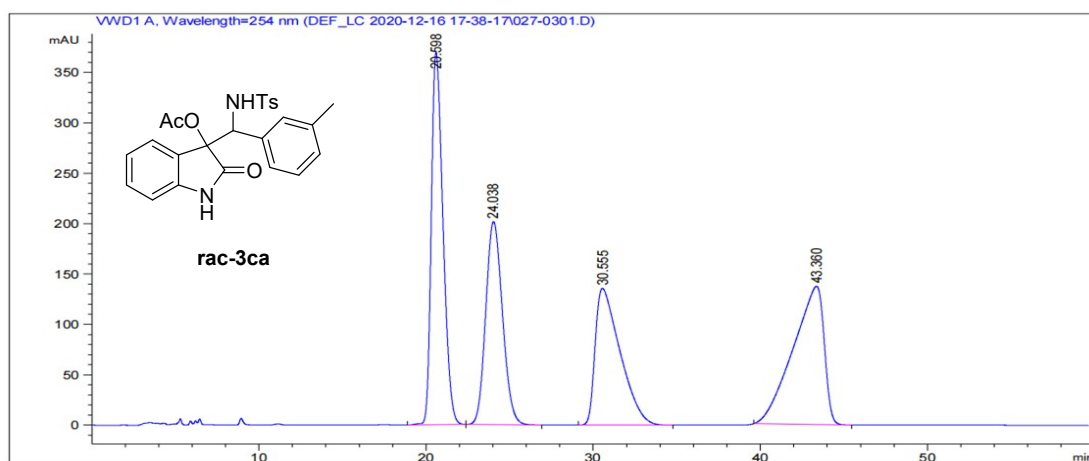

| Peak# | Retention Time | Area      | Area%   |
|-------|----------------|-----------|---------|
| 1     | 11.455         | 4.90752e4 | 37.2361 |
| 2     | 14.934         | 1.62817e4 | 12.3538 |
| 3     | 22.995         | 1.68415e4 | 12.7786 |
| 4     | 40.074         | 4.95964e4 | 37.6315 |

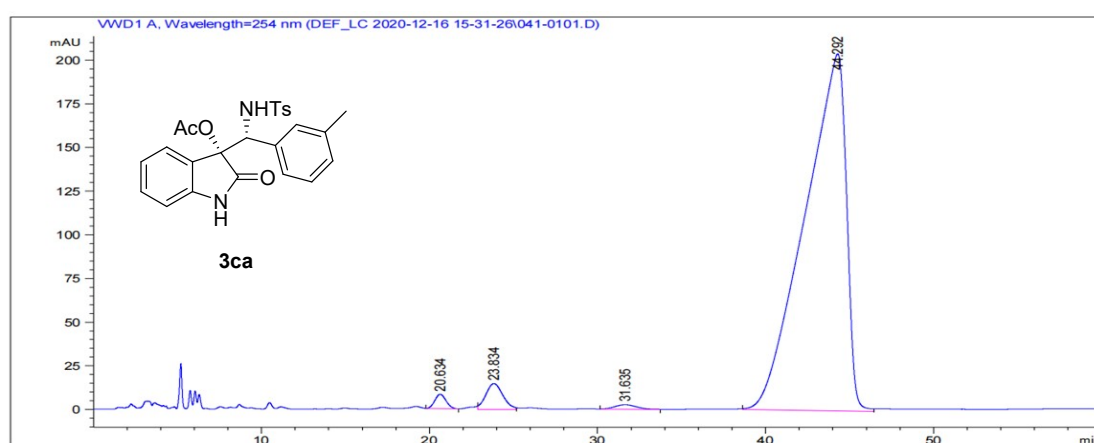

| Peak# | Retention Time | Area       | Area%   |
|-------|----------------|------------|---------|
| 1     | 11.497         | 376.01935  | 0.8786  |
| 2     | 14.705         | 1038.41614 | 3.4886  |
| 3     | 22.351         | 214.11430  | 9.4882  |
| 4     | 40.733         | 3.49961e4  | 86.1445 |



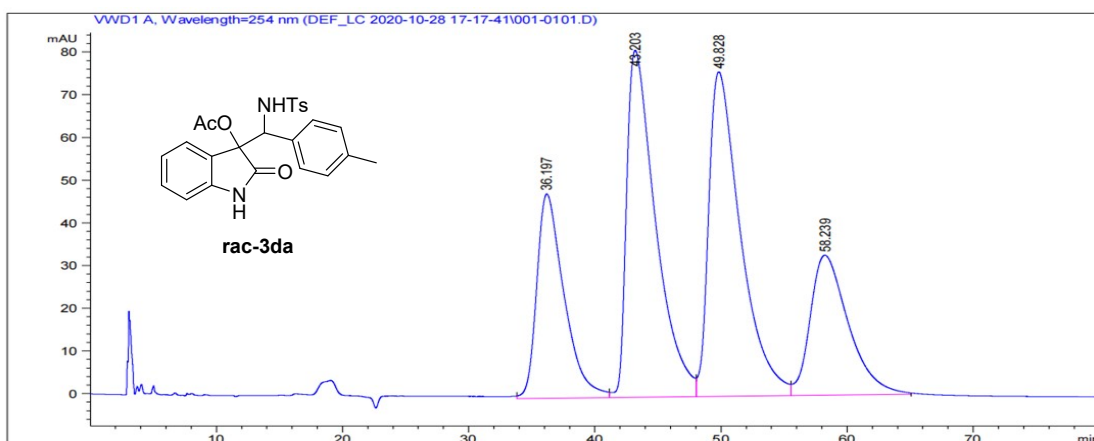

| Peak# | Retention Time | Area       | Area%   |
|-------|----------------|------------|---------|
| 1     | 36.197         | 7208.13867 | 17.8165 |
| 2     | 43.203         | 1.29935e4  | 32.1163 |
| 3     | 49.828         | 1.33438e4  | 32.9821 |
| 4     | 58.239         | 6912.24170 | 17.0851 |

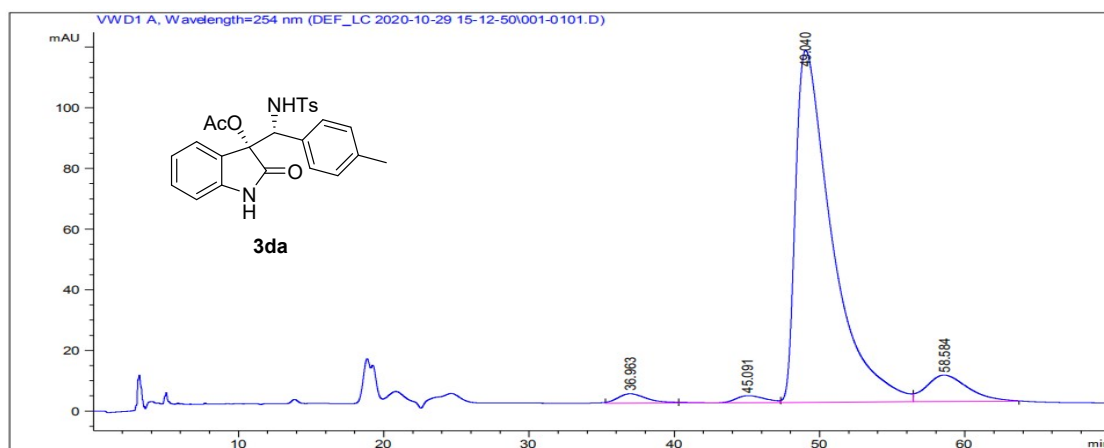

| Peak# | Retention Time | Area       | Area%   |
|-------|----------------|------------|---------|
| 1     | 36.963         | 442.07983  | 1.9516  |
| 2     | 45.091         | 329.50961  | 1.4547  |
| 3     | 49.040         | 2.01339e4  | 88.8831 |
| 4     | 58.584         | 1746.61963 | 7.7106  |

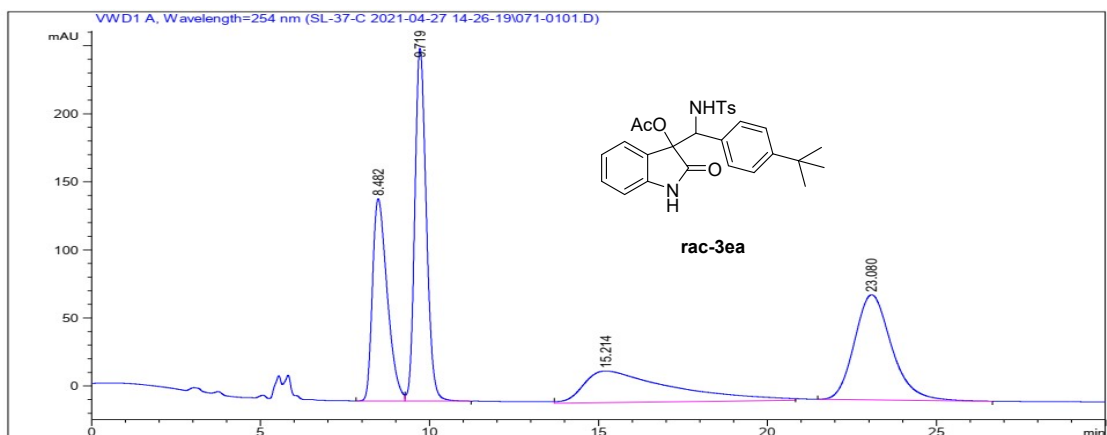

| Peak# | Retention Time | Area       | Area%   |
|-------|----------------|------------|---------|
| 1     | 8.482          | 4517.29297 | 21.8871 |
| 2     | 9.719          | 6113.34619 | 29.6203 |
| 3     | 15.214         | 4123.76074 | 19.9804 |
| 4     | 23.080         | 5884.63721 | 28.5122 |

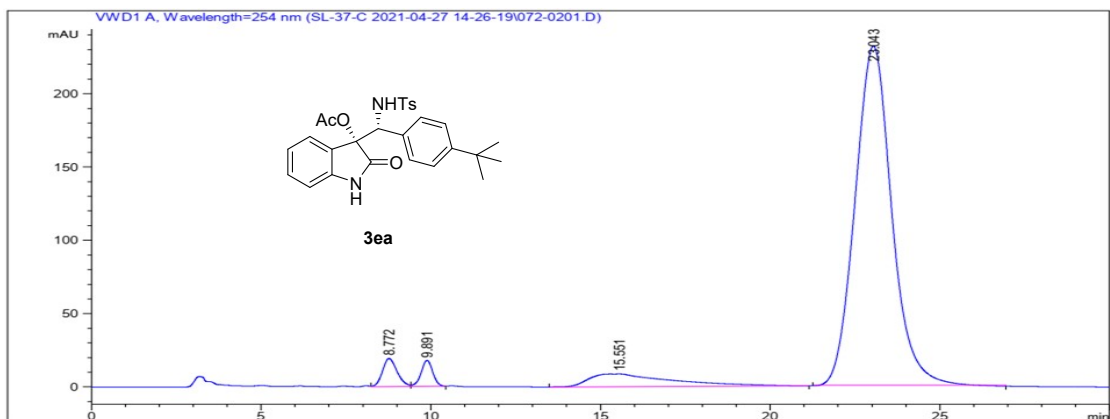

| Peak# | Retention Time | Area       | Area%   |
|-------|----------------|------------|---------|
| 1     | 8.772          | 568.63776  | 2.8722  |
| 2     | 9.891          | 418.27148  | 2.1127  |
| 3     | 15.551         | 1475.18640 | 7.4511  |
| 4     | 23.043         | 1.73360e4  | 87.5640 |

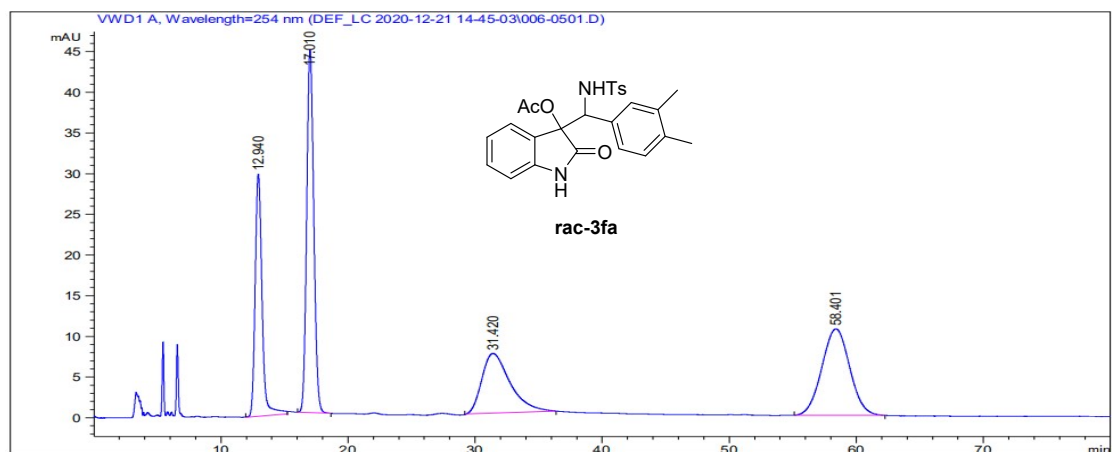

| Peak# | Retention Time | Area       | Area%   |
|-------|----------------|------------|---------|
| 1     | 12.940         | 1122.10889 | 20.0834 |
| 2     | 17.010         | 1719.66980 | 30.7785 |
| 3     | 31.420         | 1126.57922 | 20.1634 |
| 4     | 58.401         | 1618.87695 | 28.9746 |

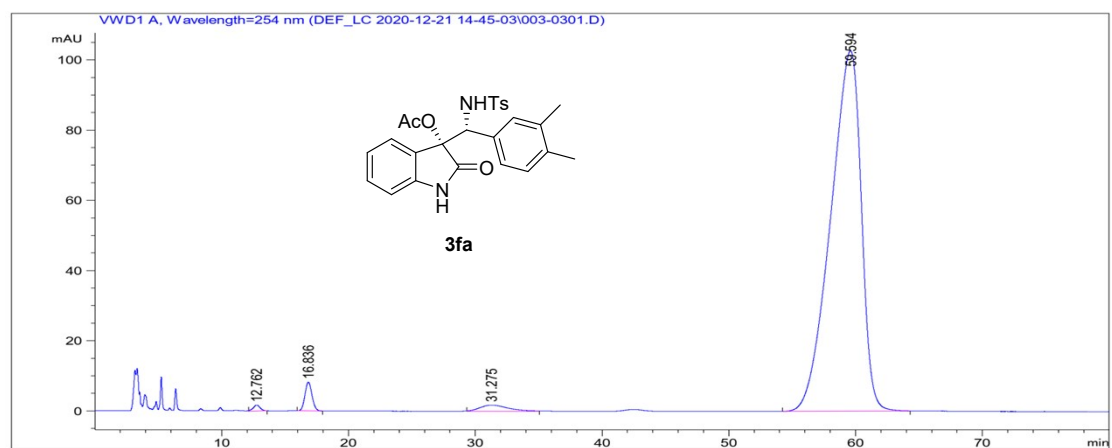

| Peak# | Retention Time | Area      | Area%   |
|-------|----------------|-----------|---------|
| 1     | 12.762         | 84.59418  | 0.4686  |
| 2     | 16.836         | 314.98401 | 1.7448  |
| 3     | 31.275         | 443.69452 | 2.4577  |
| 4     | 59.594         | 17210.0   | 95.3290 |

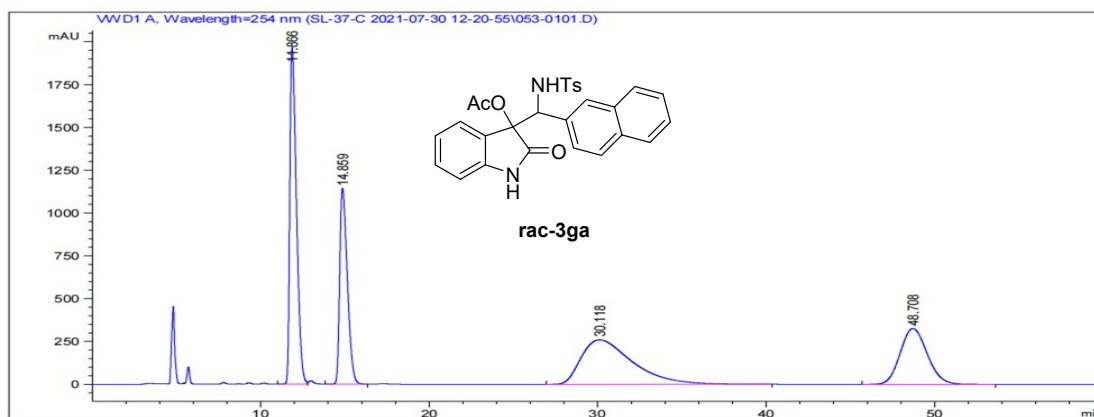

| Peak# | Retention Time | Area      | Area%   |
|-------|----------------|-----------|---------|
| 1     | 11.866         | 5.37464e4 | 29.7757 |
| 2     | 14.859         | 3.58072e4 | 19.8373 |
| 3     | 30.118         | 5.47544e4 | 30.3342 |
| 4     | 48.708         | 3.61959e4 | 20.0527 |

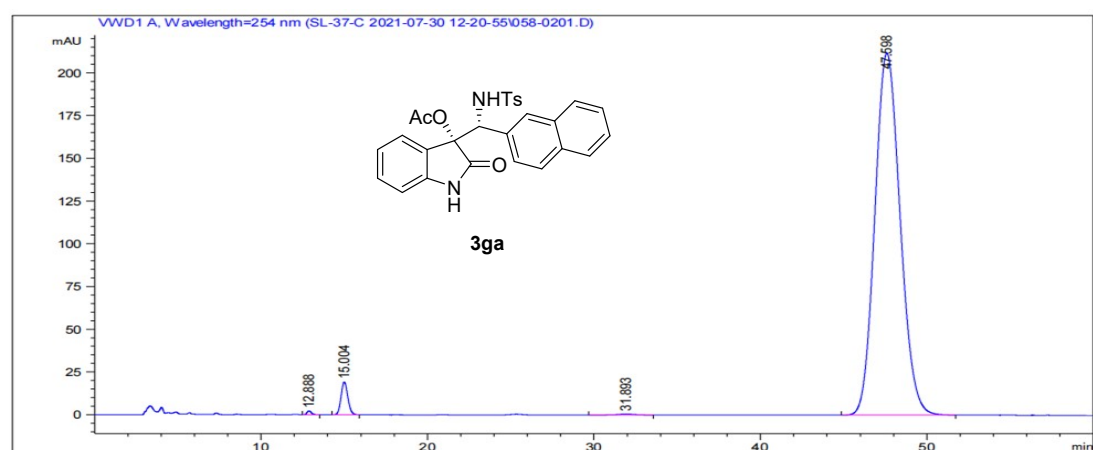

| Peak# | Retention Time | Area      | Area%   |
|-------|----------------|-----------|---------|
| 1     | 12.888         | 41.12314  | 0.1793  |
| 2     | 15.004         | 542.54950 | 2.3653  |
| 3     | 31.893         | 69.35703  | 0.302   |
| 4     | 47.598         | 2.22848e4 | 97.1530 |

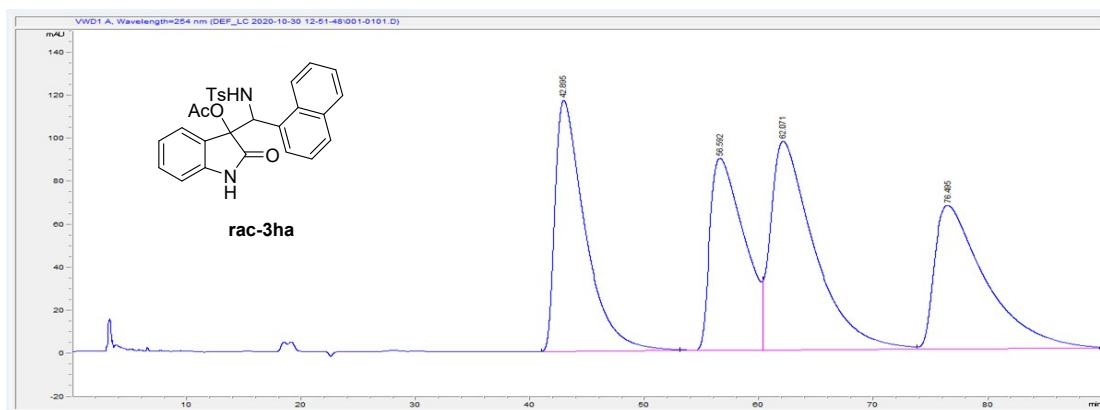

| Peak# | Retention Time | Area      | Area%   |
|-------|----------------|-----------|---------|
| 1     | 42.895         | 2.13946e4 | 24.5576 |
| 2     | 56.592         | 1.88732e4 | 21.6633 |
| 3     | 62.071         | 2.57895e4 | 29.6022 |
| 4     | 76.495         | 2.10630e4 | 24.1769 |

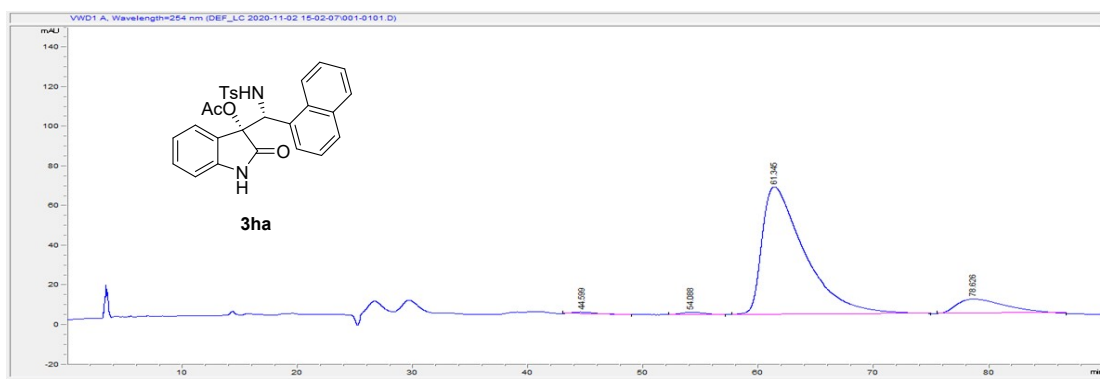

| Peak# | Retention Time | Area       | Area%   |
|-------|----------------|------------|---------|
| 1     | 44.599         | 151.77515  | 0.8013  |
| 2     | 54.088         | 200.00208  | 1.0559  |
| 3     | 61.345         | 1.64311e4  | 86.7509 |
| 4     | 78.626         | 2157.67505 | 11.3918 |

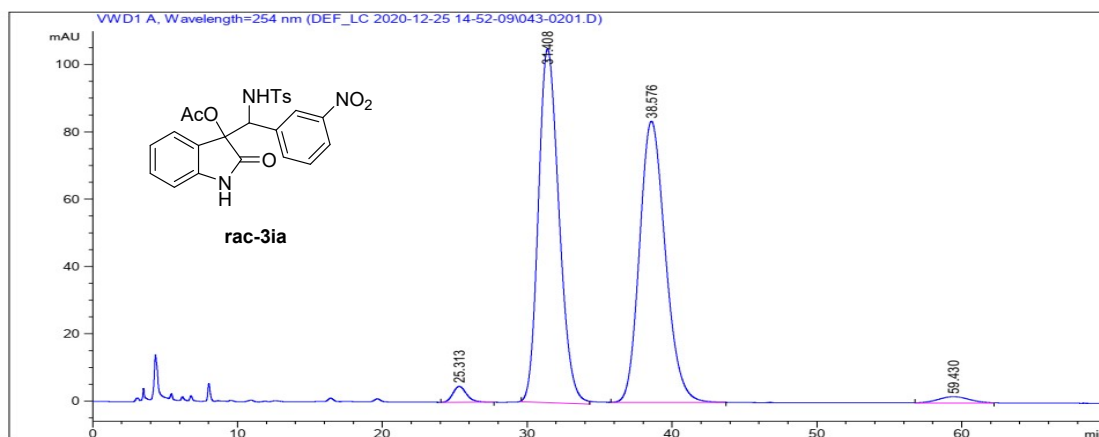

| Peak# | Retention Time | Area      | Area%   |
|-------|----------------|-----------|---------|
| 1     | 25.313         | 312.20825 | 1.4632  |
| 2     | 31.408         | 10399.11  | 48.7378 |
| 3     | 38.576         | 10323.40  | 48.3829 |
| 4     | 59.429         | 302.14886 | 1.4161  |

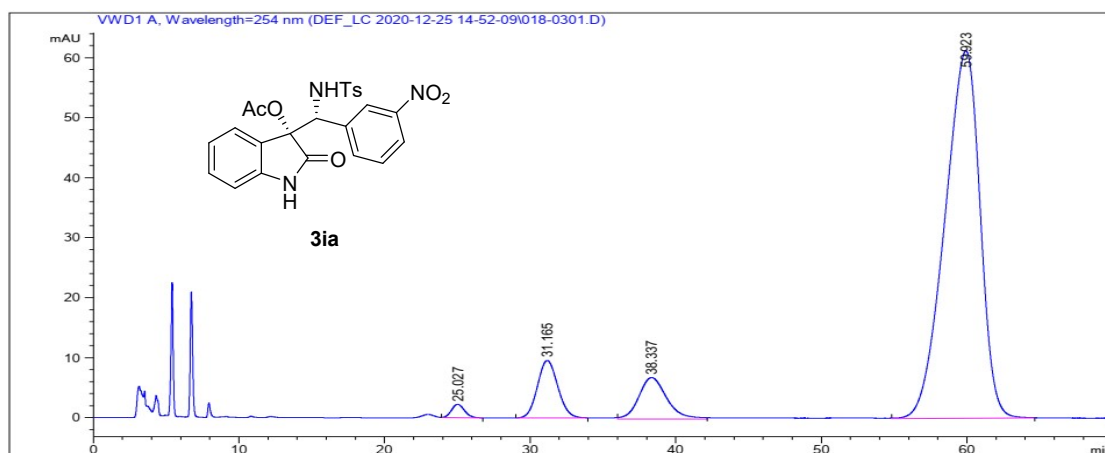

| Peak# | Retention Time | Area      | Area%   |
|-------|----------------|-----------|---------|
| 1     | 25.027         | 135.86183 | 1.0830  |
| 2     | 31.165         | 923.98108 | 7.3652  |
| 3     | 38.337         | 918.82520 | 7.3241  |
| 4     | 59.922         | 10436.1   | 84.2278 |

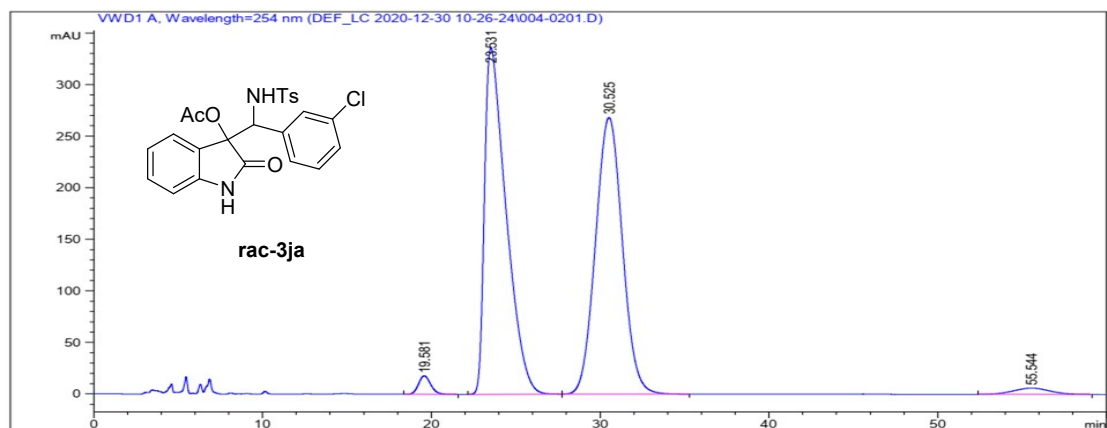

| Peak# | Retention Time | Area      | Area%   |
|-------|----------------|-----------|---------|
| 1     | 19.581         | 902.55109 | 1.4748  |
| 2     | 23.531         | 2.97761e4 | 48.6540 |
| 3     | 30.525         | 2.96240e4 | 48.4055 |
| 4     | 55.544         | 897.03772 | 1.4658  |

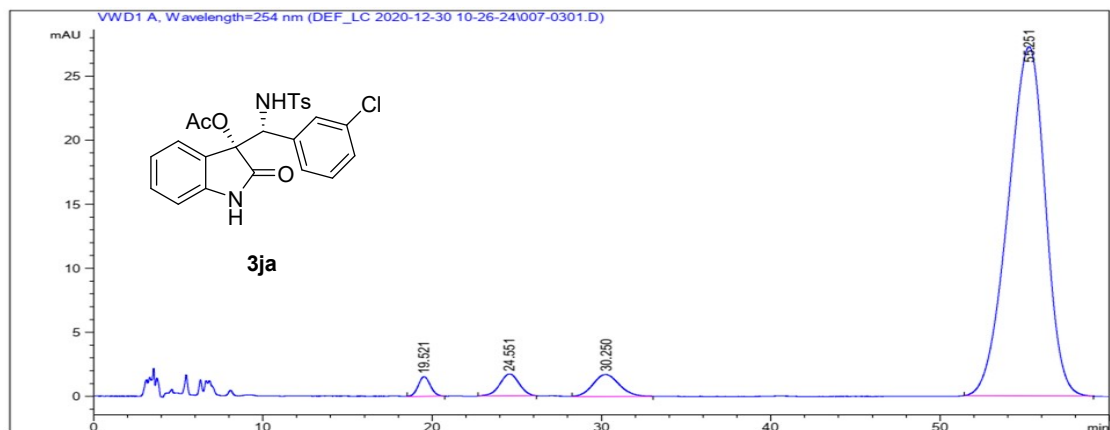

| Peak# | Retention Time | Area       | Area%   |
|-------|----------------|------------|---------|
| 1     | 19.521         | 75.68641   | 1.6617  |
| 2     | 24.551         | 135.68826  | 2.9791  |
| 3     | 30.251         | 186.78535  | 4.1009  |
| 4     | 55.251         | 4156.52881 | 91.2582 |

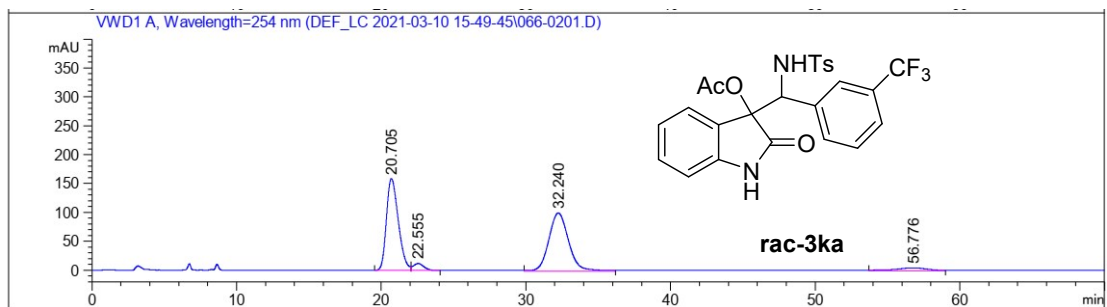

| Peak# | Retention Time | Area       | Area%   |
|-------|----------------|------------|---------|
| 1     | 20.705         | 9042.71191 | 45.3333 |
| 2     | 22.555         | 595.91644  | 2.9875  |
| 3     | 32.240         | 9607.39746 | 48.1642 |
| 4     | 56.776         | 701.13434  | 3.5150  |

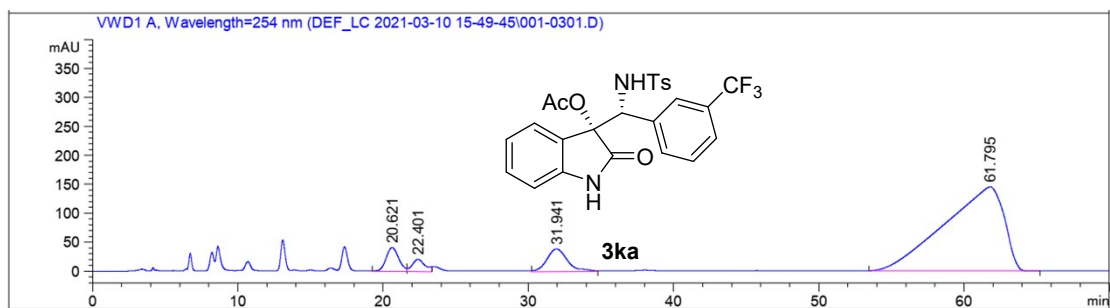

| Peak# | Retention Time | Area       | Area%   |
|-------|----------------|------------|---------|
| 1     | 20.621         | 2450.21802 | 5.0064  |
| 2     | 22.401         | 1296.14758 | 2.6484  |
| 3     | 31.941         | 3771.41333 | 7.7060  |
| 4     | 61.795         | 4.14237e4  | 84.6393 |



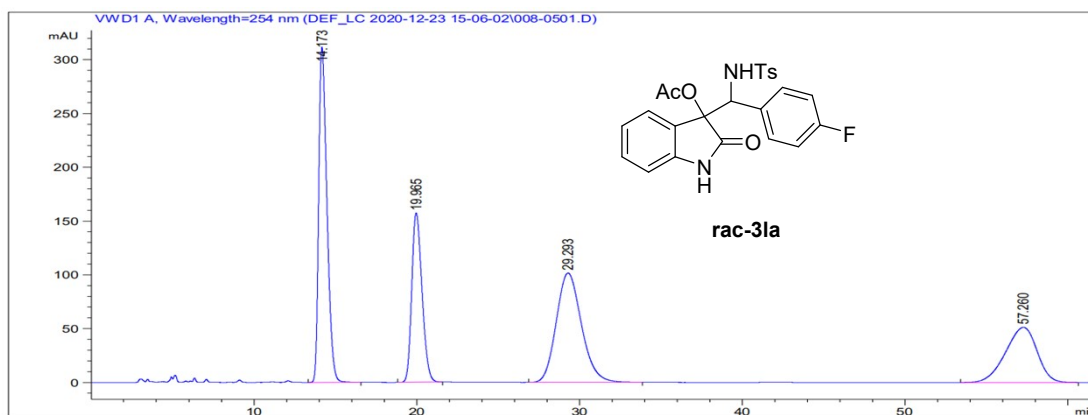

| Peak# | Retention Time | Area       | Area%   |
|-------|----------------|------------|---------|
| 1     | 14.173         | 1.09381e4  | 30.7177 |
| 2     | 19.965         | 6865.47168 | 19.2804 |
| 3     | 29.293         | 1.09157e4  | 30.6547 |
| 4     | 57.260         | 6889.31152 | 19.3473 |

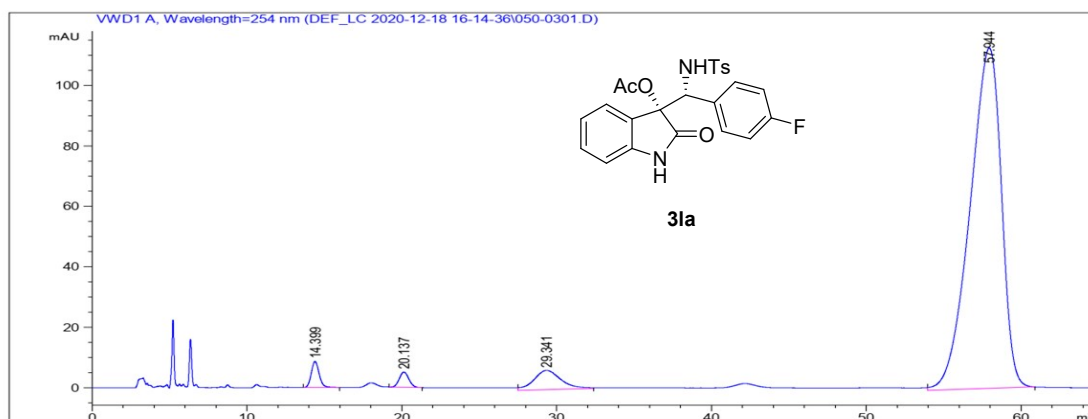

| Peak# | Retention Time | Area      | Area%   |
|-------|----------------|-----------|---------|
| 1     | 14.399         | 303.42355 | 1.7706  |
| 2     | 20.137         | 214.91441 | 1.2541  |
| 3     | 29.347         | 772.27985 | 4.5065  |
| 4     | 57.944         | 1.58463e4 | 92.4688 |

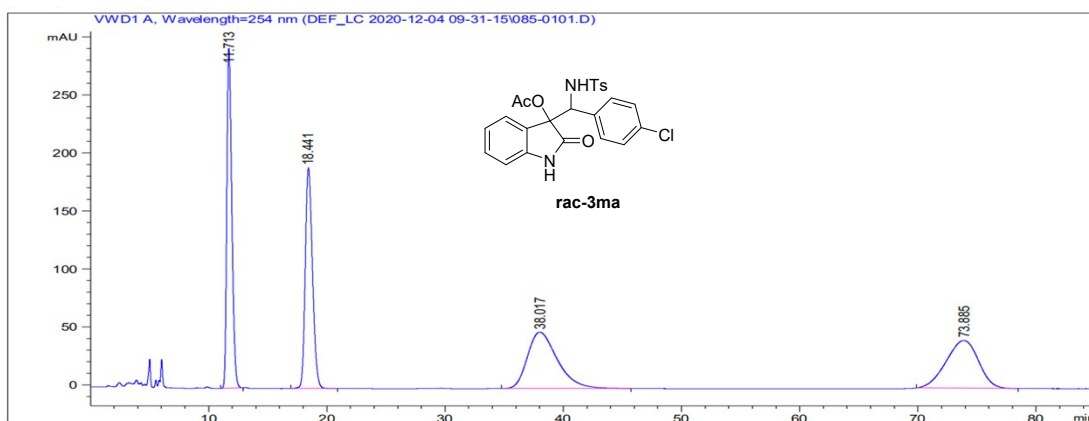

| Peak# | Retention Time | Area       | Area%   |
|-------|----------------|------------|---------|
| 1     | 11.713         | 8580.37598 | 25.9683 |
| 2     | 18.441         | 8071.57471 | 24.4284 |
| 3     | 38.017         | 8530.20801 | 25.8164 |
| 4     | 73.885         | 7859.62939 | 23.7869 |

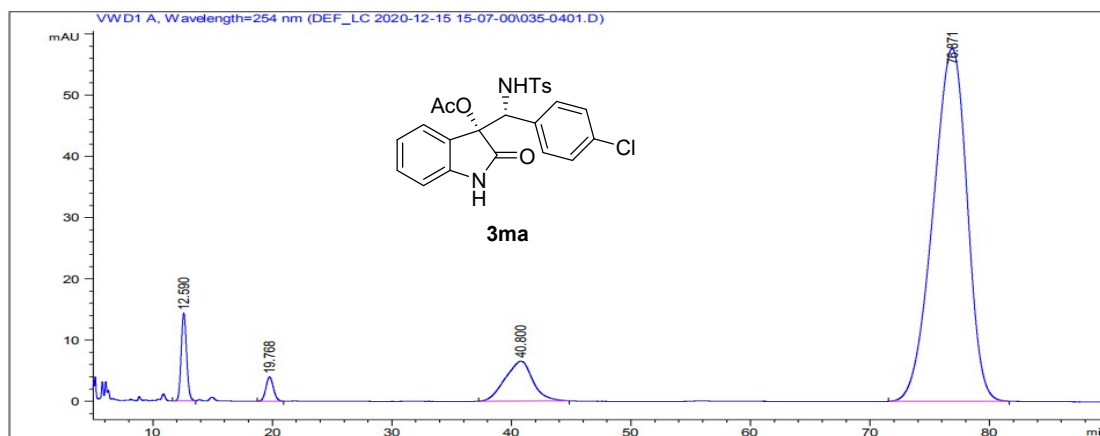

| Peak# | Retention Time | Area       | Area%   |
|-------|----------------|------------|---------|
| 1     | 12.590         | 452.06543  | 3.4616  |
| 2     | 19.768         | 172.88231  | 1.3238  |
| 3     | 40.800         | 1045.86230 | 8.0085  |
| 4     | 76.871         | 1.13886e4  | 87.2061 |

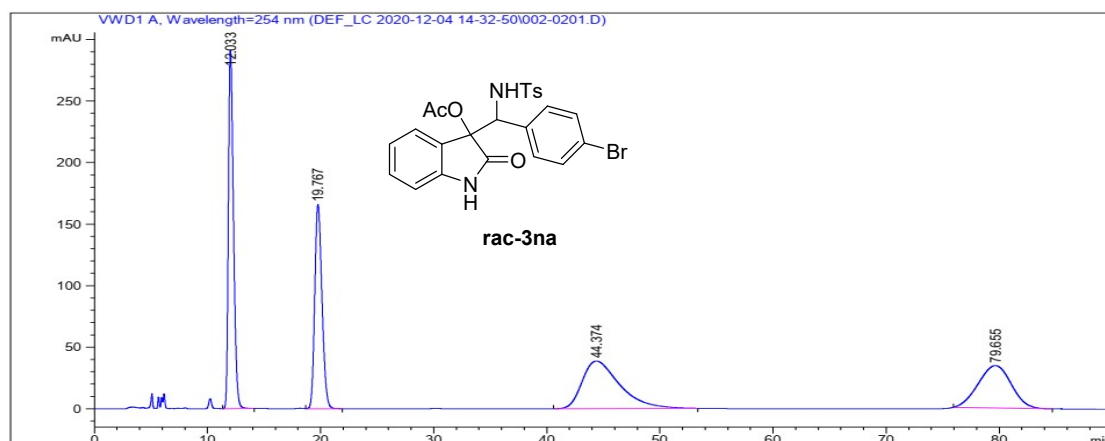

| Peak# | Retention Time | Area       | Area%   |
|-------|----------------|------------|---------|
| 1     | 12.033         | 9060.74219 | 28.0799 |
| 2     | 19.767         | 7355.35400 | 22.7948 |
| 3     | 44.374         | 8885.72559 | 27.5375 |
| 4     | 79.655         | 6965.84863 | 21.5877 |

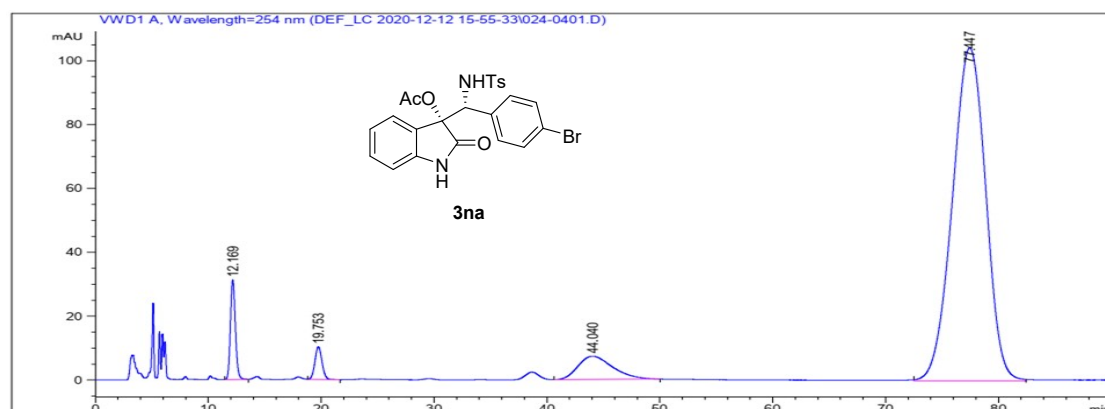

| Peak# | Retention Time | Area       | Area%   |
|-------|----------------|------------|---------|
| 1     | 12.169         | 950.85400  | 3.9106  |
| 2     | 19.753         | 446.82974  | 1.8377  |
| 3     | 44.040         | 1560.74072 | 6.4189  |
| 4     | 77.447         | 2.13565e4  | 87.8329 |

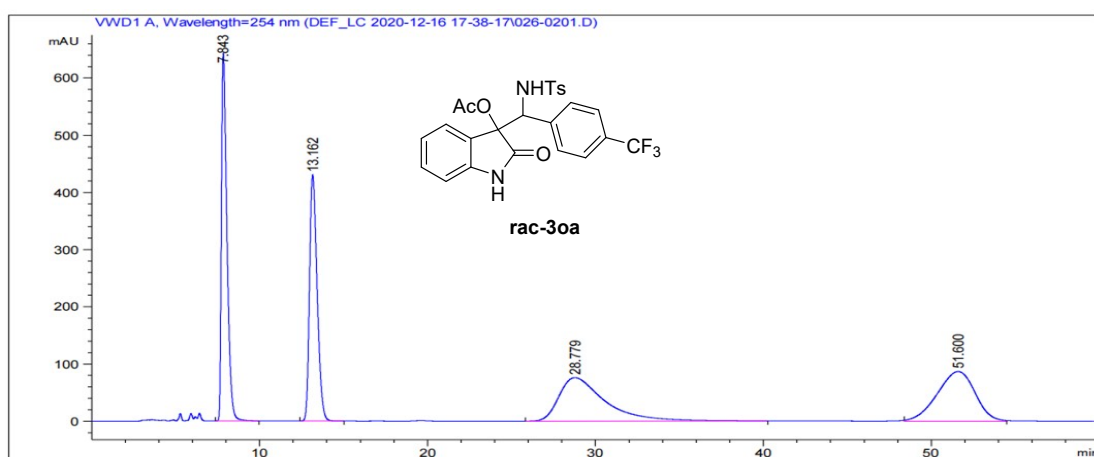

| Peak# | Retention Time | Area      | Area%   |
|-------|----------------|-----------|---------|
| 1     | 7.843          | 1.46729e4 | 26.0612 |
| 2     | 13.162         | 4.35984e4 | 24.1528 |
| 3     | 28.779         | 1.44482e4 | 25.6622 |
| 4     | 51.600         | 1.35820e4 | 24.1237 |

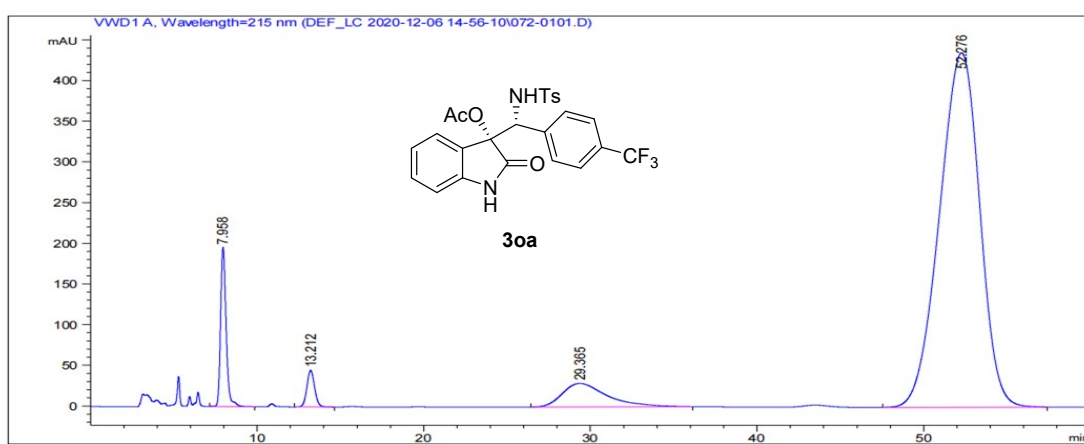

| Peak# | Retention Time | Area       | Area%   |
|-------|----------------|------------|---------|
| 1     | 7.958          | 4485.00195 | 5.3290  |
| 2     | 13.212         | 1446.17529 | 1.7183  |
| 3     | 29.365         | 5391.12109 | 6.4057  |
| 4     | 52.276         | 7.28395e4  | 86.5470 |

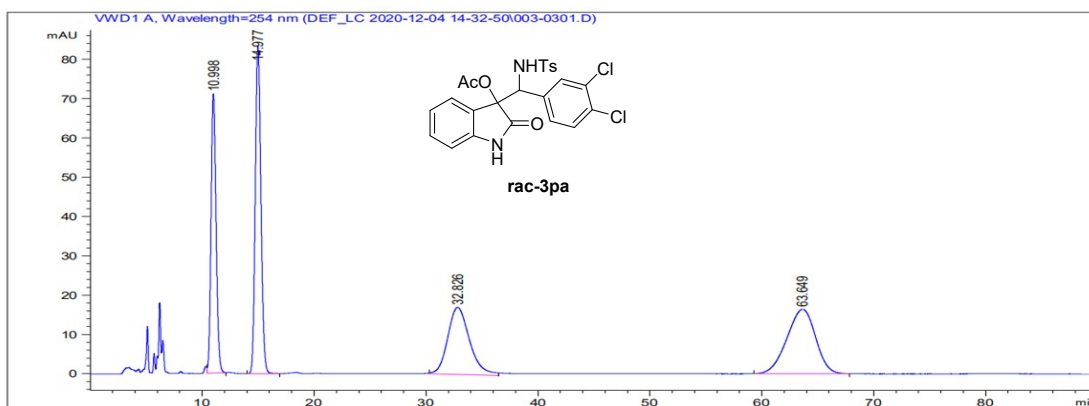

| Peak# | Retention Time | Area       | Area%   |
|-------|----------------|------------|---------|
| 1     | 10.998         | 2214.74780 | 21.3503 |
| 2     | 14.977         | 2930.17188 | 28.2470 |
| 3     | 32.826         | 2318.61963 | 22.3516 |
| 4     | 63.649         | 2909.83960 | 28.0510 |

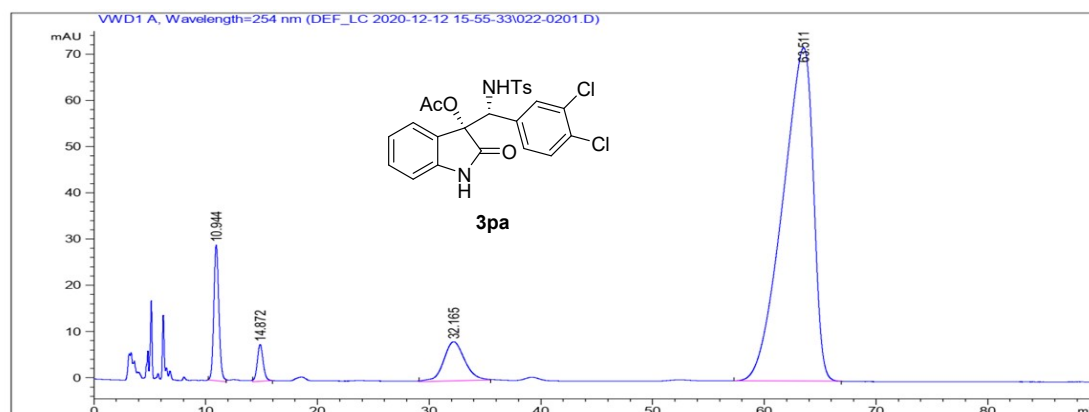

| Peak# | Retention Time | Area      | Area%   |
|-------|----------------|-----------|---------|
| 1     | 10.943         | 893.11395 | 5.6386  |
| 2     | 14.873         | 278.11292 | 1.7559  |
| 3     | 32.169         | 936.92523 | 5.9152  |
| 4     | 63.511         | 1.37310e4 | 86.6902 |

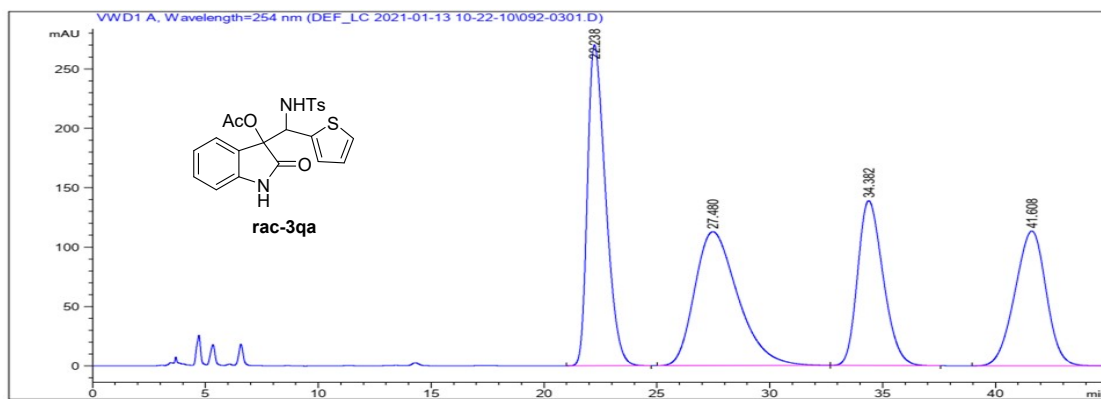

| Peak# | Retention Time | Area      | Area%   |
|-------|----------------|-----------|---------|
| 1     | 22.238         | 1.50651e4 | 29.0820 |
| 2     | 27.480         | 1.49438e4 | 28.8478 |
| 3     | 34.382 B       | 1.08961e4 | 21.0340 |
| 4     | 41.608         | 1.08972e4 | 21.0362 |

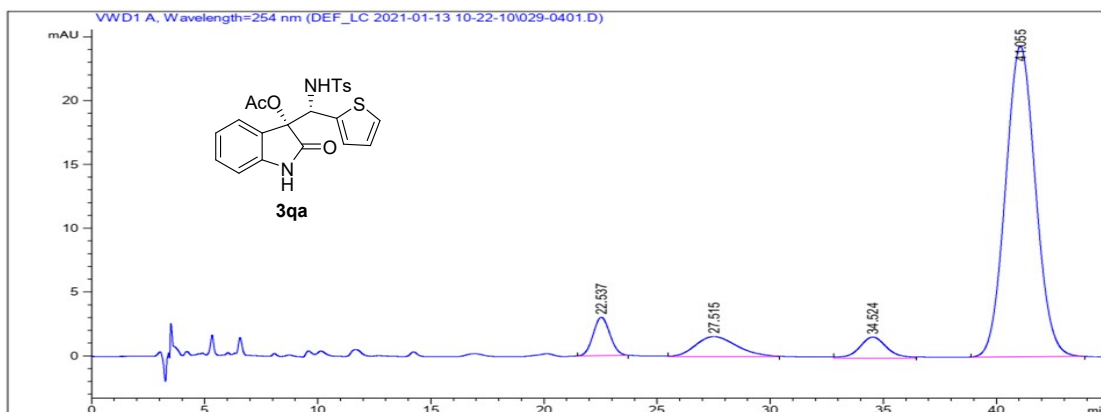

| Peak# | Retention Time | Area       | Area%   |
|-------|----------------|------------|---------|
| 1     | 22.537         | 154.03752  | 5.5409  |
| 2     | 27.515         | 242.97783  | 8.7403  |
| 3     | 34.524         | 144.14236  | 5.1850  |
| 4     | 41.055         | 2238.82739 | 80.5338 |

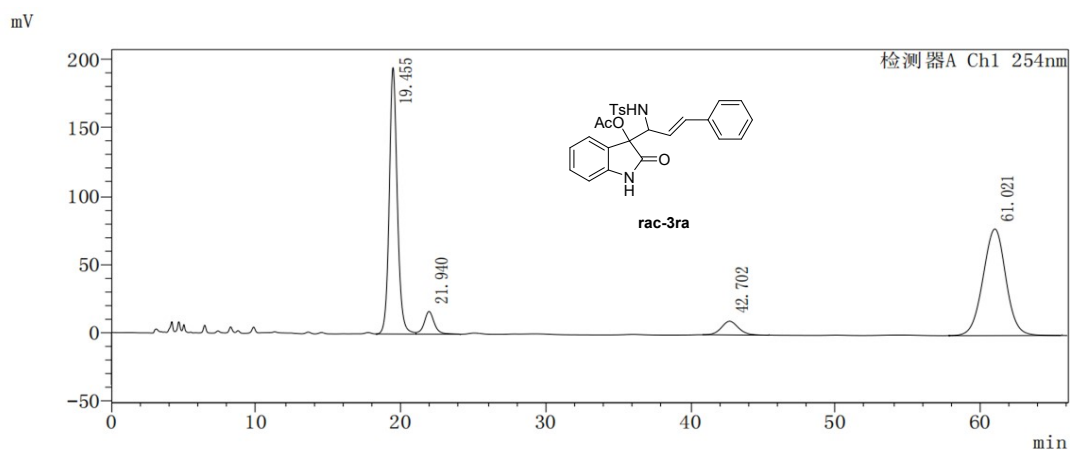

| Peak# | Retention Time | Area    | Area%  |
|-------|----------------|---------|--------|
| 1     | 19.455         | 6013544 | 44.879 |
| 2     | 21.940         | 621333  | 4.637  |
| 3     | 42.702         | 698246  | 5.211  |
| 4     | 61.012         | 6066338 | 45.273 |

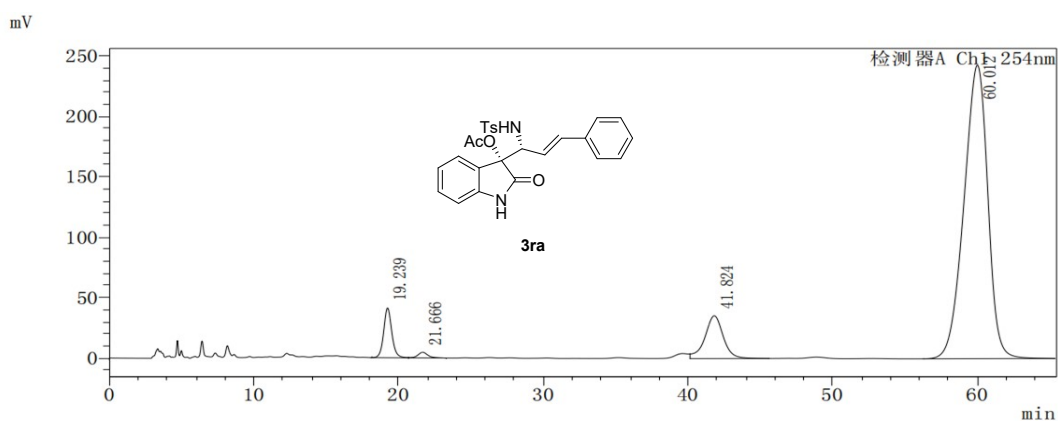

| Peak# | Retention Time | Area     | Area%  |
|-------|----------------|----------|--------|
| 1     | 19.239         | 1609895  | 4.900  |
| 2     | 21.666         | 223093   | 0.679  |
| 3     | 41.824         | 3142175  | 9.563  |
| 4     | 60.012         | 27881707 | 84.858 |

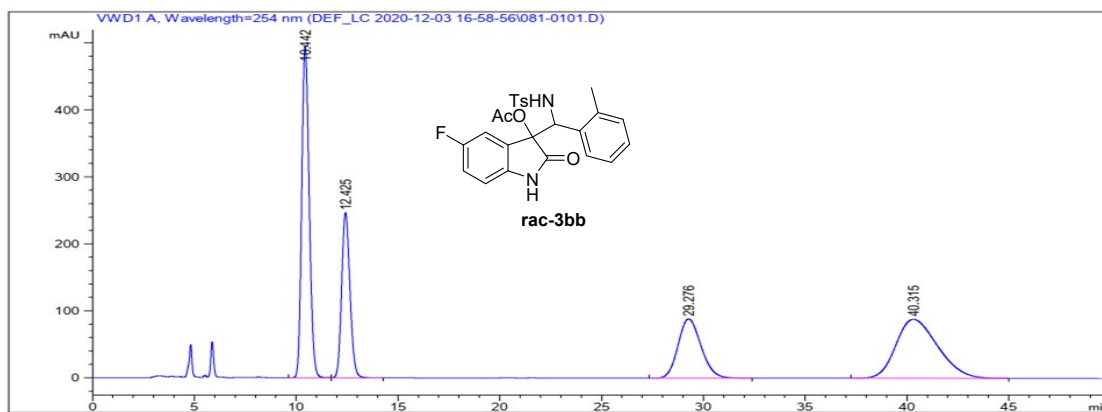

| Peak# | Retention Time | Area       | Area%   |
|-------|----------------|------------|---------|
| 1     | 10.442         | 1.25945e4  | 31.3936 |
| 2     | 12.425         | 6942.06201 | 17.3041 |
| 3     | 29.276         | 6926.31201 | 17.2649 |
| 4     | 40.315         | 1.24909e4  | 31.1355 |

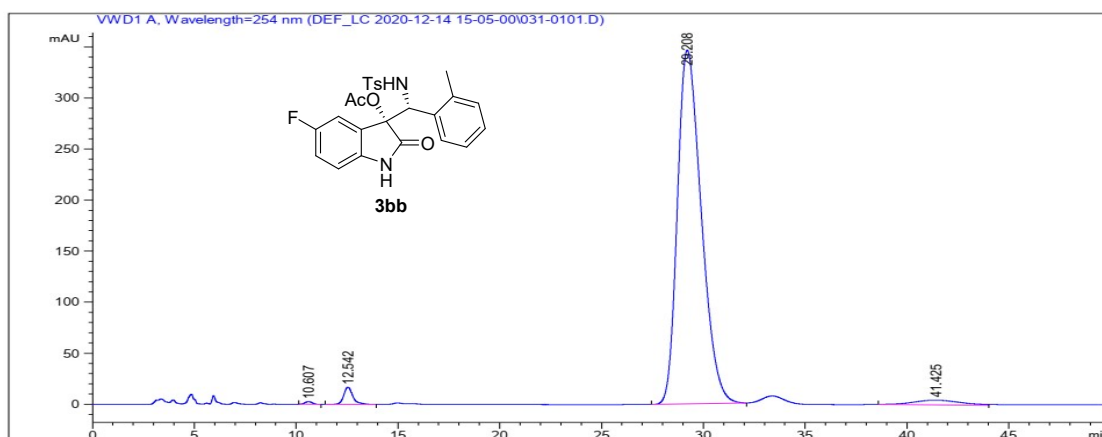

| Peak# | Retention Time | Area       | Area%   |
|-------|----------------|------------|---------|
| 1     | 10.607         | 62.81887   | 0.2108  |
| 2     | 12.542         | 524.17572  | 1.7585  |
| 3     | 29.208         | 2.82197e4  | 94.6740 |
| 4     | 41.375         | 1000.53473 | 3.3567  |



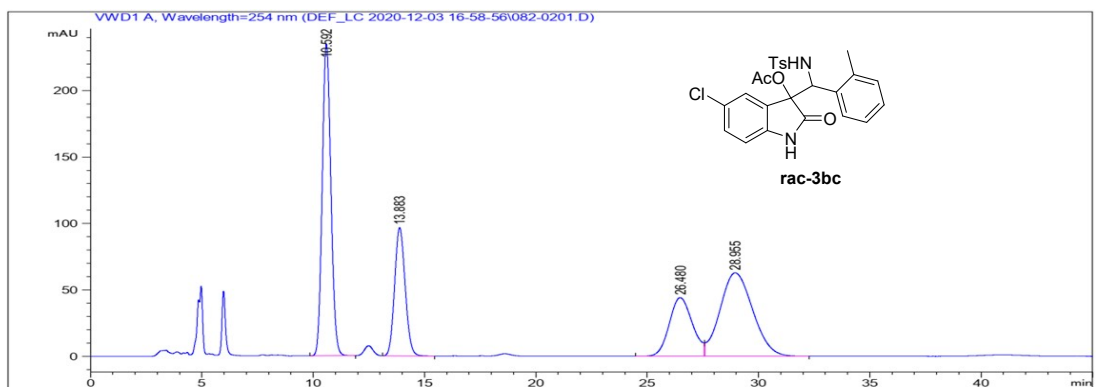

| Peak# | Retention Time | Area       | Area%   |
|-------|----------------|------------|---------|
| 1     | 10.592         | 6357.72949 | 33.2376 |
| 2     | 13.883         | 3189.30786 | 16.6734 |
| 3     | 26.480         | 3170.62280 | 16.5757 |
| 4     | 28.955         | 6410.48975 | 33.5134 |

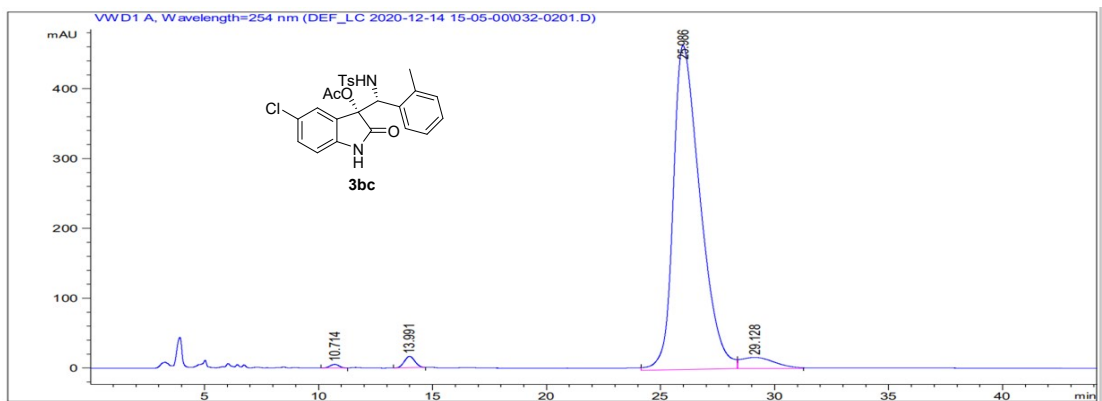

| Peak# | Retention Time | Area       | Area%   |
|-------|----------------|------------|---------|
| 1     | 10.710         | 139.24260  | 0.3441  |
| 2     | 13.991         | 517.06921  | 1.2780  |
| 3     | 25.986         | 3.81326e4  | 94.2476 |
| 4     | 29.128         | 1671.08899 | 4.1302  |

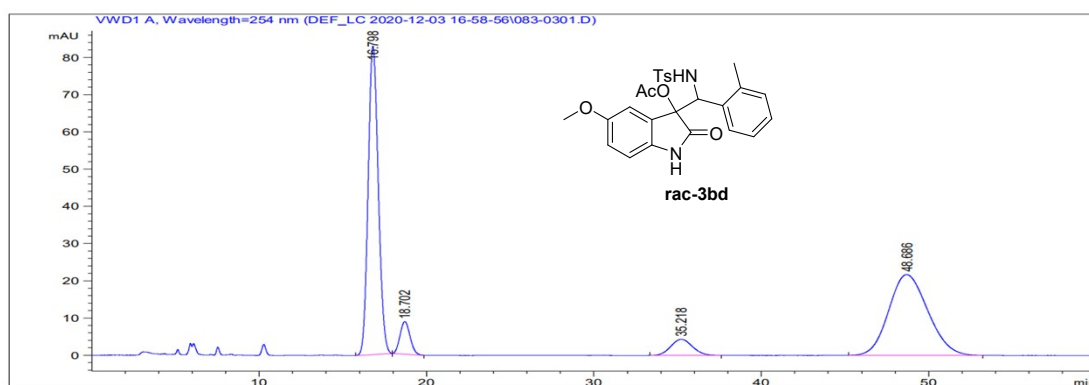

| Peak# | Retention Time | Area     | Area%   |
|-------|----------------|----------|---------|
| 1     | 16.798         | 82.83369 | 44.9349 |
| 2     | 18.702         | 8.76689  | 4.6893  |
| 3     | 35.218         | 4.33215  | 5.0198  |
| 4     | 48.686         | 21.67719 | 45.3560 |

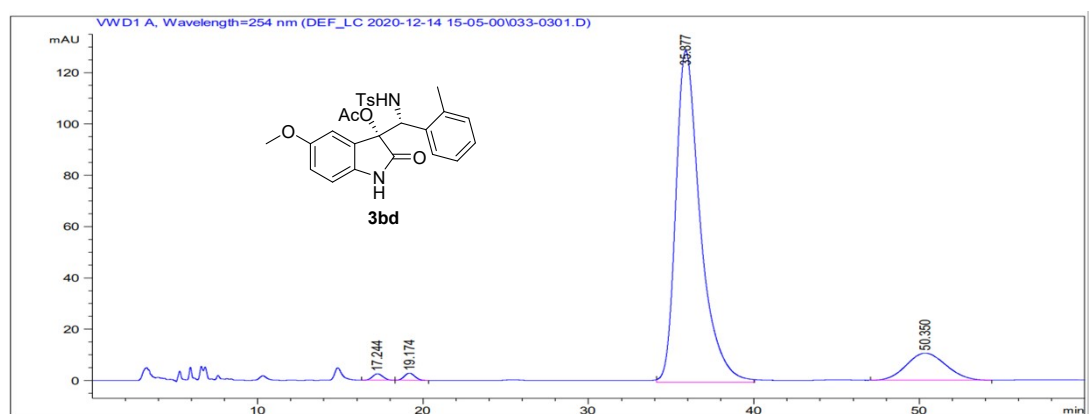

| Peak# | Retention Time | Area       | Area%   |
|-------|----------------|------------|---------|
| 1     | 17.244         | 109.15645  | 0.7131  |
| 2     | 19.174         | 122.37705  | 0.7995  |
| 3     | 35.877         | 1.33228e4  | 87.0398 |
| 4     | 50.350         | 1752.22473 | 11.4476 |

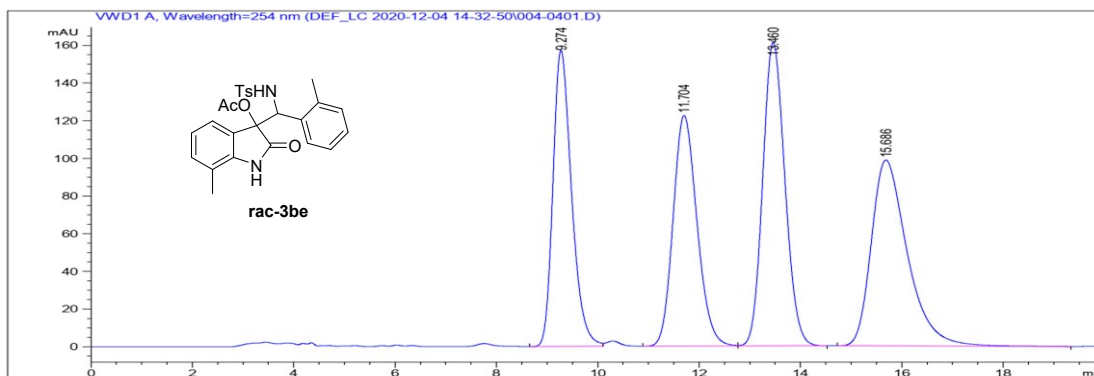

| Peak# | Retention Time | Area       | Area%   |
|-------|----------------|------------|---------|
| 1     | 9.590          | 4492.37256 | 27.8723 |
| 2     | 12.126         | 4462.75000 | 27.6885 |
| 3     | 14.052         | 3572.83643 | 22.1671 |
| 4     | 16.370         | 3589.76025 | 22.2721 |

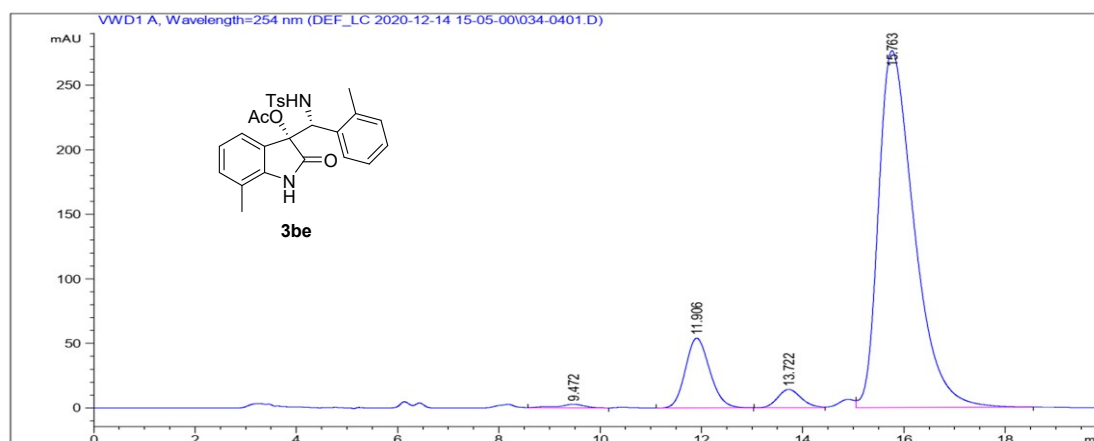

| Peak# | Retention Time | Area       | Area%   |
|-------|----------------|------------|---------|
| 1     | 9.666          | 177.62604  | 0.4929  |
| 2     | 12.131         | 4105.70996 | 11.3941 |
| 3     | 14.078         | 1050.18042 | 2.9144  |
| 4     | 15.962         | 3.07001e4  | 85.1985 |

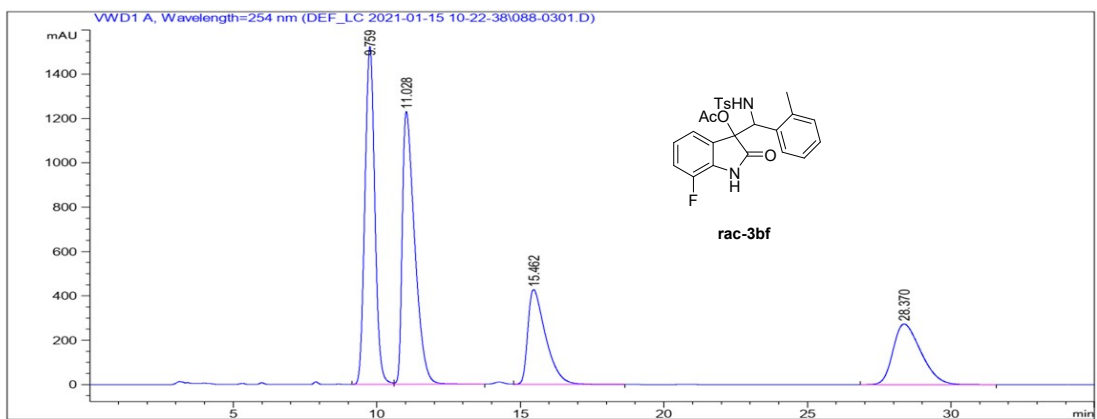

| Peak# | Retention Time | Area      | Area%   |
|-------|----------------|-----------|---------|
| 1     | 9.759          | 3.64769e4 | 33.0902 |
| 2     | 11.028         | 3.70050e4 | 33.5692 |
| 3     | 15.462         | 1.83792e4 | 16.6728 |
| 4     | 28.370         | 1.83737e4 | 16.6678 |

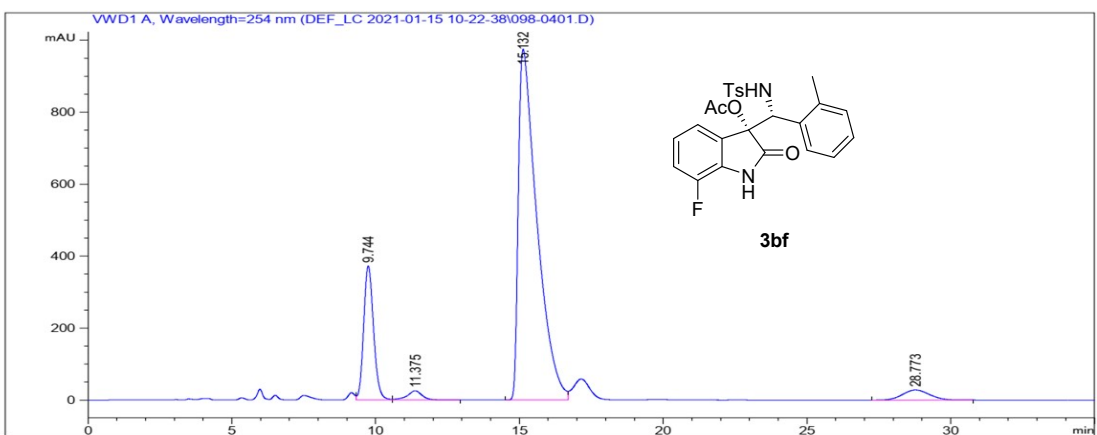

| Peak# | Retention Time | Area       | Area%   |
|-------|----------------|------------|---------|
| 1     | 9.744          | 8897.38672 | 16.0299 |
| 2     | 11.375         | 911.02985  | 1.6413  |
| 3     | 15.132         | 4.38803e4  | 79.0565 |
| 4     | 28.773         | 1816.30945 | 3.2723  |

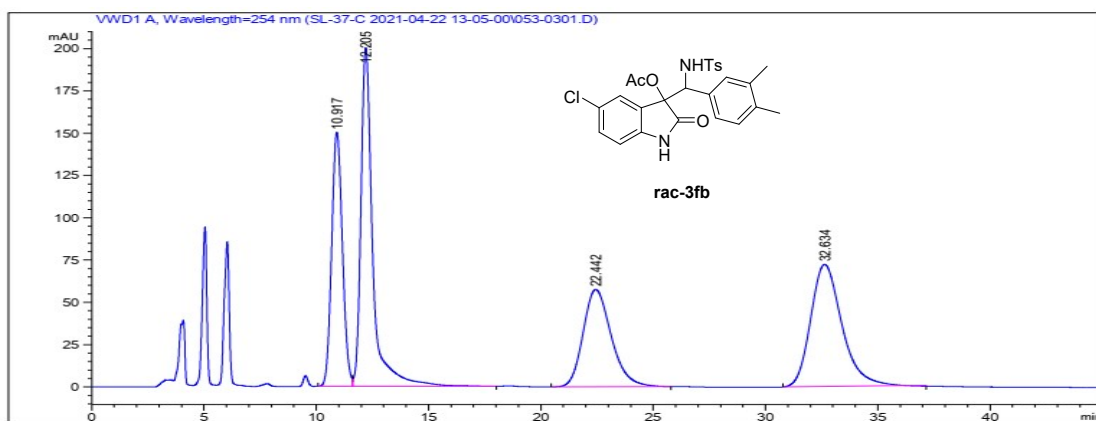

| Peak# | Retention Time | Area       | Area%   |
|-------|----------------|------------|---------|
| 1     | 10.917         | 5008.21680 | 20.6105 |
| 2     | 12.205         | 7331.53809 | 30.1718 |
| 3     | 22.442         | 4998.07568 | 20.5688 |
| 4     | 32.634         | 6961.47070 | 28.6489 |

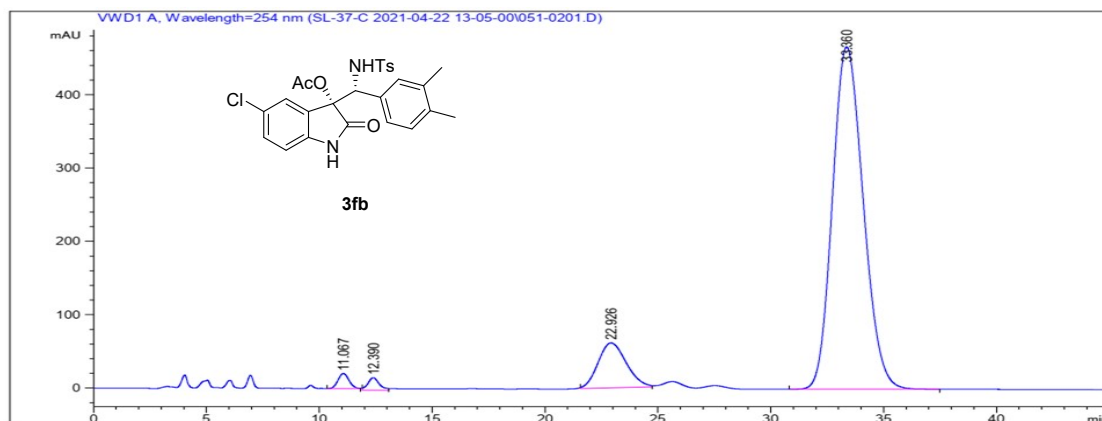

| Peak# | Retention Time | Area       | Area%   |
|-------|----------------|------------|---------|
| 1     | 11.067         | 698.77124  | 1.3748  |
| 2     | 12.390         | 595.81995  | 1.1722  |
| 3     | 22.926         | 5309.32568 | 10.4455 |
| 4     | 33.360         | 4.42247e4  | 87.0075 |

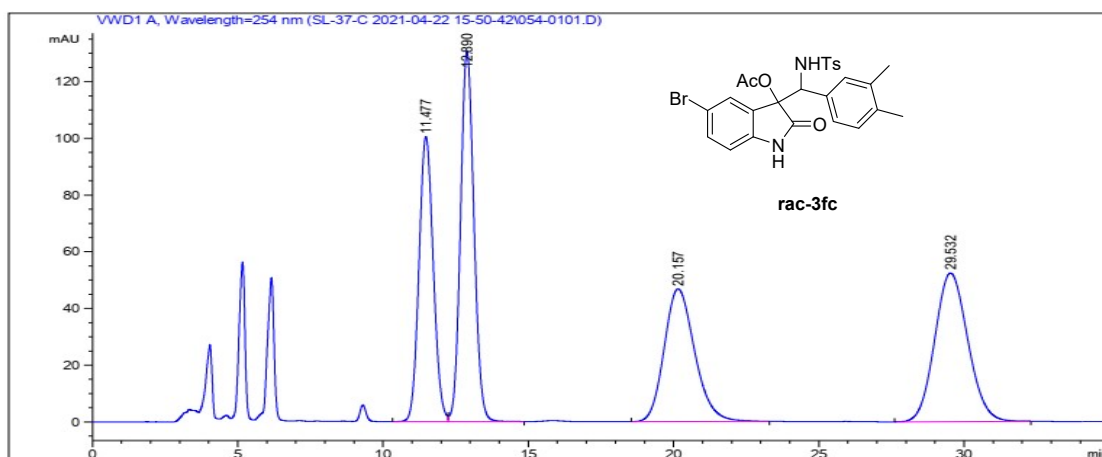

| Peak# | Retention Time | Area       | Area%   |
|-------|----------------|------------|---------|
| 1     | 11.477         | 3434.51831 | 22.6216 |
| 2     | 12.890         | 4189.20654 | 27.5924 |
| 3     | 20.157         | 3412.87207 | 22.4790 |
| 4     | 29.532         | 4145.86572 | 27.3069 |

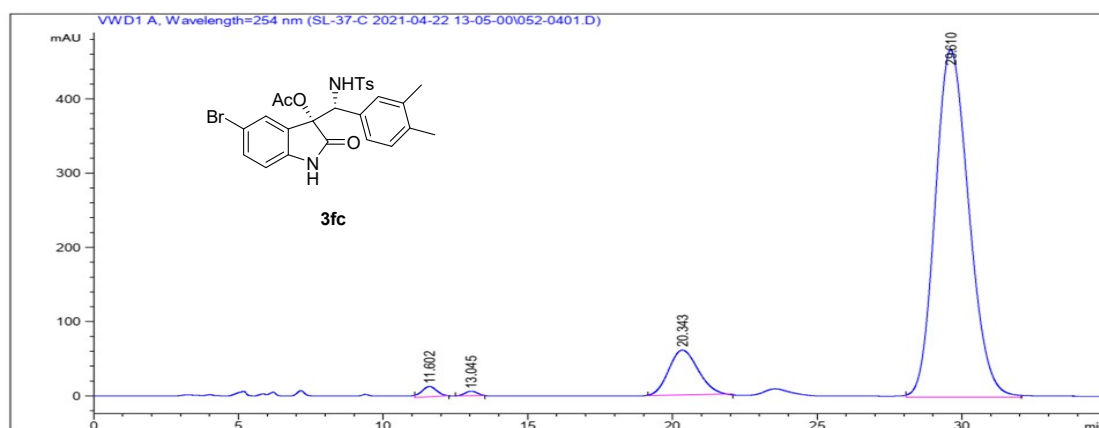

| Peak# | Retention Time | Area       | Area%   |
|-------|----------------|------------|---------|
| 1     | 11.602         | 496.39383  | 1.1611  |
| 2     | 13.045         | 184.28030  | 0.4310  |
| 3     | 20.343         | 4267.55420 | 9.9822  |
| 4     | 29.610         | 3.78034e4  | 88.4256 |

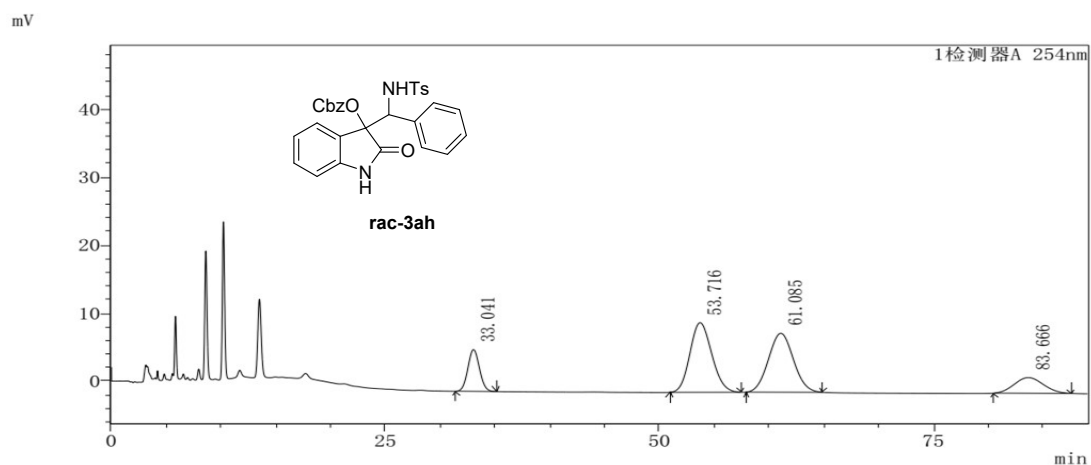

| Peak# | Retention Time | Area    | Area%  |
|-------|----------------|---------|--------|
| 1     | 33.041         | 450915  | 12.305 |
| 2     | 53.716         | 1417615 | 38.686 |
| 3     | 61.085         | 1372766 | 37.463 |
| 4     | 83.666         | 423074  | 11.546 |

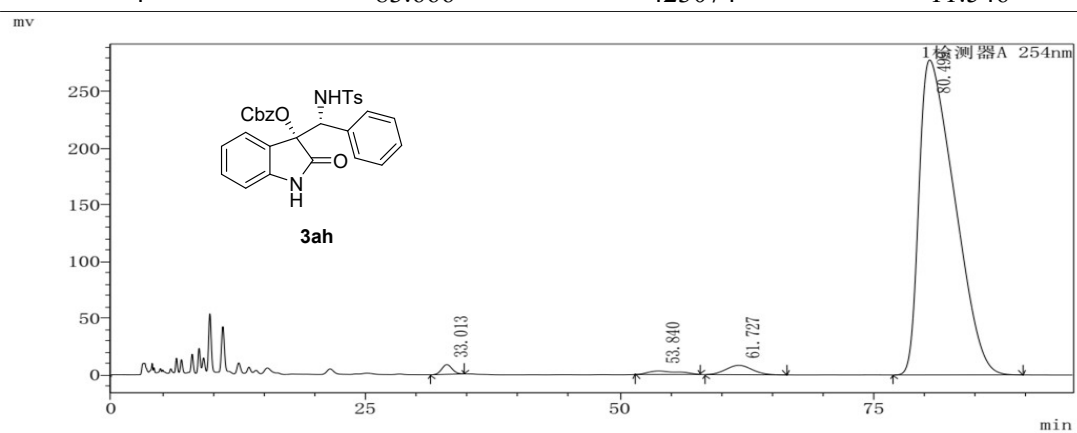

| Peak# | Retention Time | Area   | Area%  |
|-------|----------------|--------|--------|
| 1     | 33.013         | 8525   | 0.869  |
| 2     | 53.840         | 2947   | 0.839  |
| 3     | 61.727         | 8175   | 2.077  |
| 4     | 80.499         | 278417 | 96.215 |

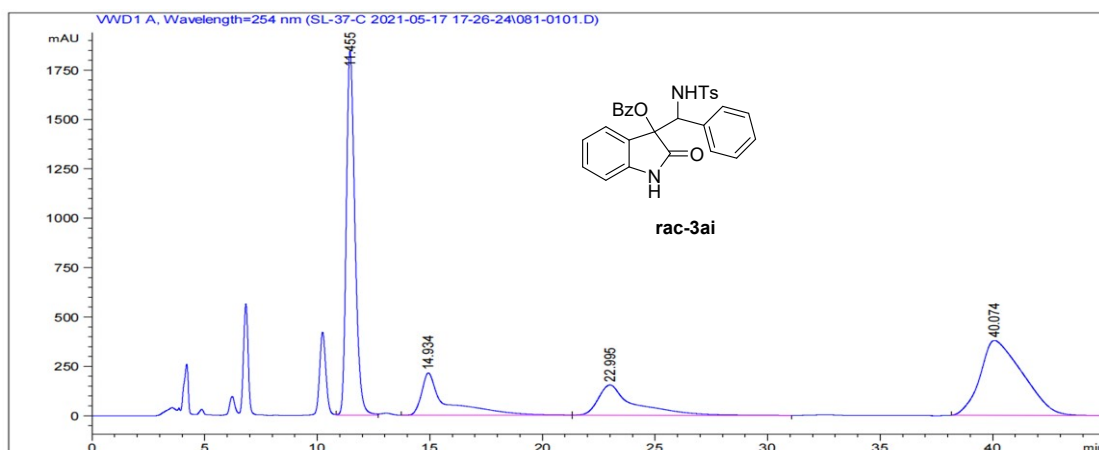

| Peak# | Retention Time | Area   | Area%  |
|-------|----------------|--------|--------|
| 1     | 33.013         | 8525   | 0.869  |
| 2     | 53.840         | 2947   | 0.839  |
| 3     | 61.727         | 8175   | 2.077  |
| 4     | 80.499         | 278417 | 96.215 |

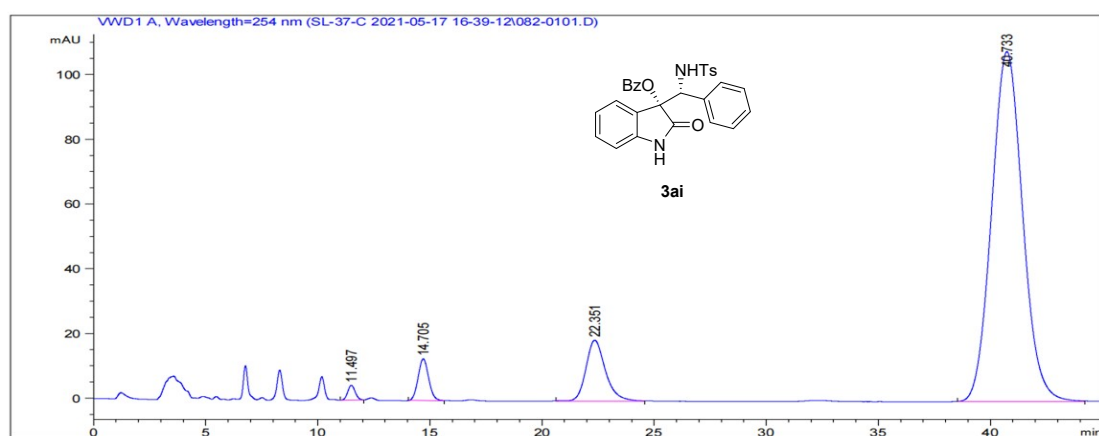

| Peak# | Retention Time | Area   | Area%  |
|-------|----------------|--------|--------|
| 1     | 33.013         | 8525   | 0.869  |
| 2     | 53.840         | 2947   | 0.839  |
| 3     | 61.727         | 8175   | 2.077  |
| 4     | 80.499         | 278417 | 96.215 |



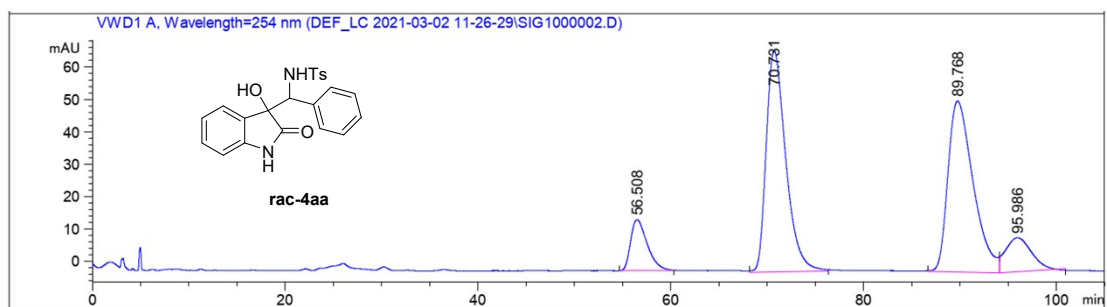

| Peak# | Retention Time | Area       | Area%   |
|-------|----------------|------------|---------|
| 1     | 56.508         | 1893.79529 | 8.1879  |
| 2     | 70.731         | 9629.56152 | 41.6297 |
| 3     | 89.768         | 9645.88867 | 41.7003 |
| 4     | 95.986         | 1962.22485 | 8.4829  |

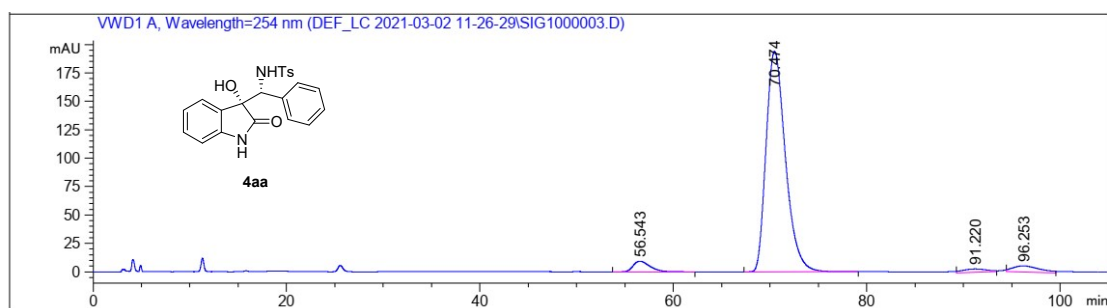

| Peak# | Retention Time | Area       | Area%   |
|-------|----------------|------------|---------|
| 1     | 56.543         | 1132.86096 | 3.8009  |
| 2     | 70.474         | 2.70235e4  | 90.6677 |
| 3     | 91.220         | 548.59631  | 1.8406  |
| 4     | 96.253         | 1100.04626 | 3.6908  |

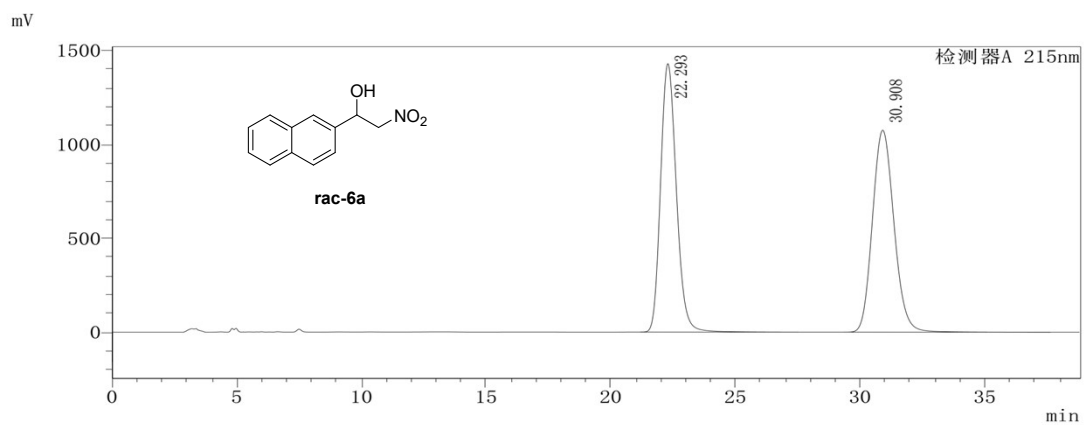

| Peak# | Retention Time | Area     | Area%  |
|-------|----------------|----------|--------|
| 1     | 22.293         | 62945527 | 49.332 |
| 2     | 30.908         | 64649218 | 50.668 |

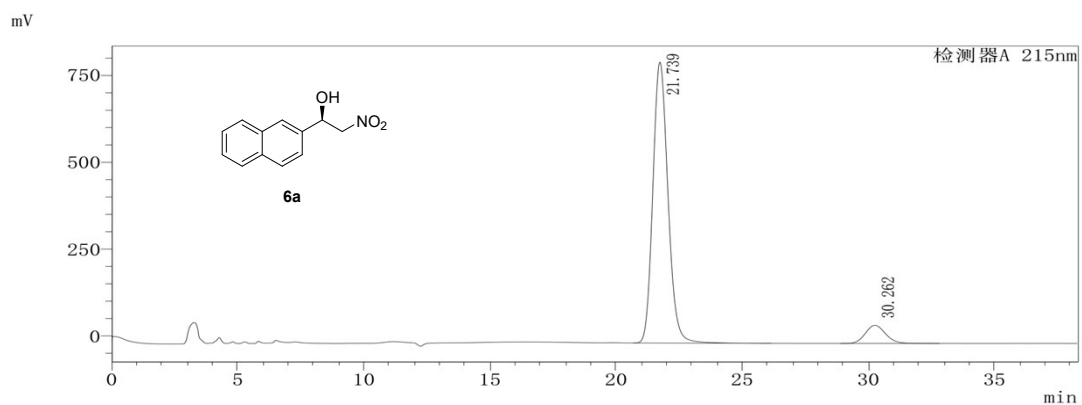

| Peak# | Retention Time | Area     | Area%  |
|-------|----------------|----------|--------|
| 1     | 21.739         | 33546586 | 92.064 |
| 2     | 30.262         | 2891620  | 7.936  |

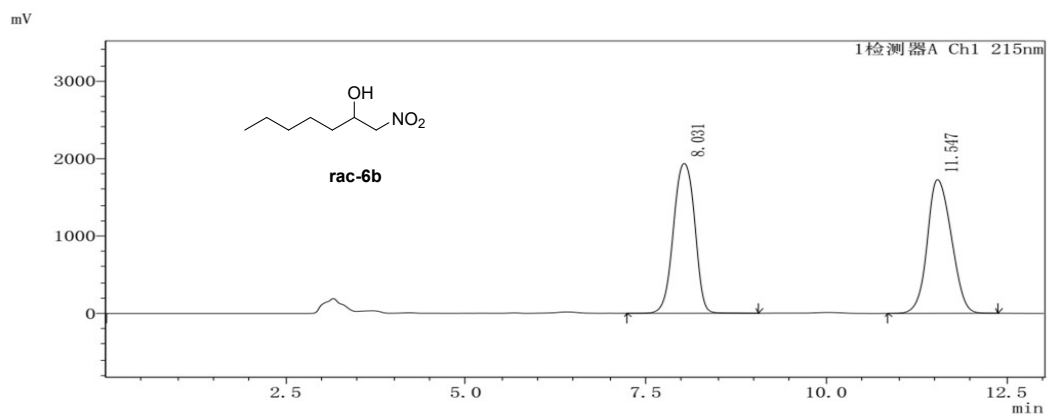

| Peak# | Retention Time | Area     | Area%  |
|-------|----------------|----------|--------|
| 1     | 8.031          | 39761355 | 49.610 |
| 2     | 11.547         | 40386669 | 50.390 |

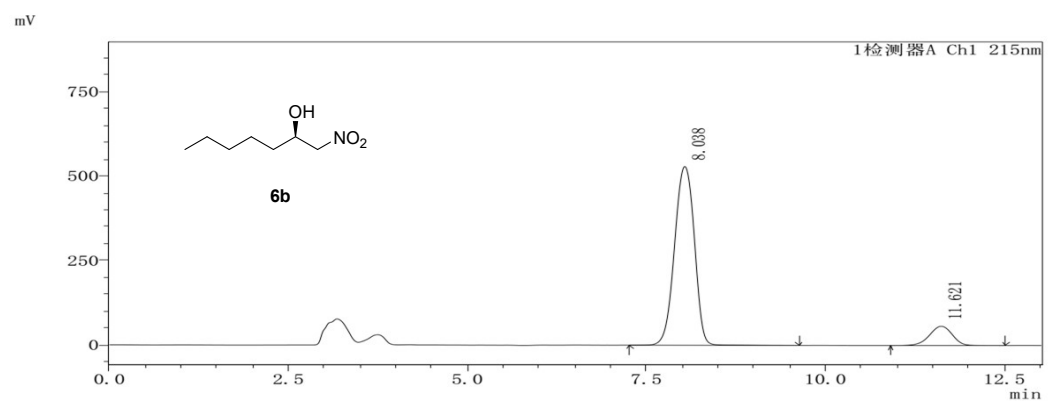

| Peak# | Retention Time | Area     | Area%  |
|-------|----------------|----------|--------|
| 1     | 8.038          | 10198318 | 89.037 |
| 2     | 11.621         | 1255764  | 10.963 |

## 4. Copies of NMR Spectra

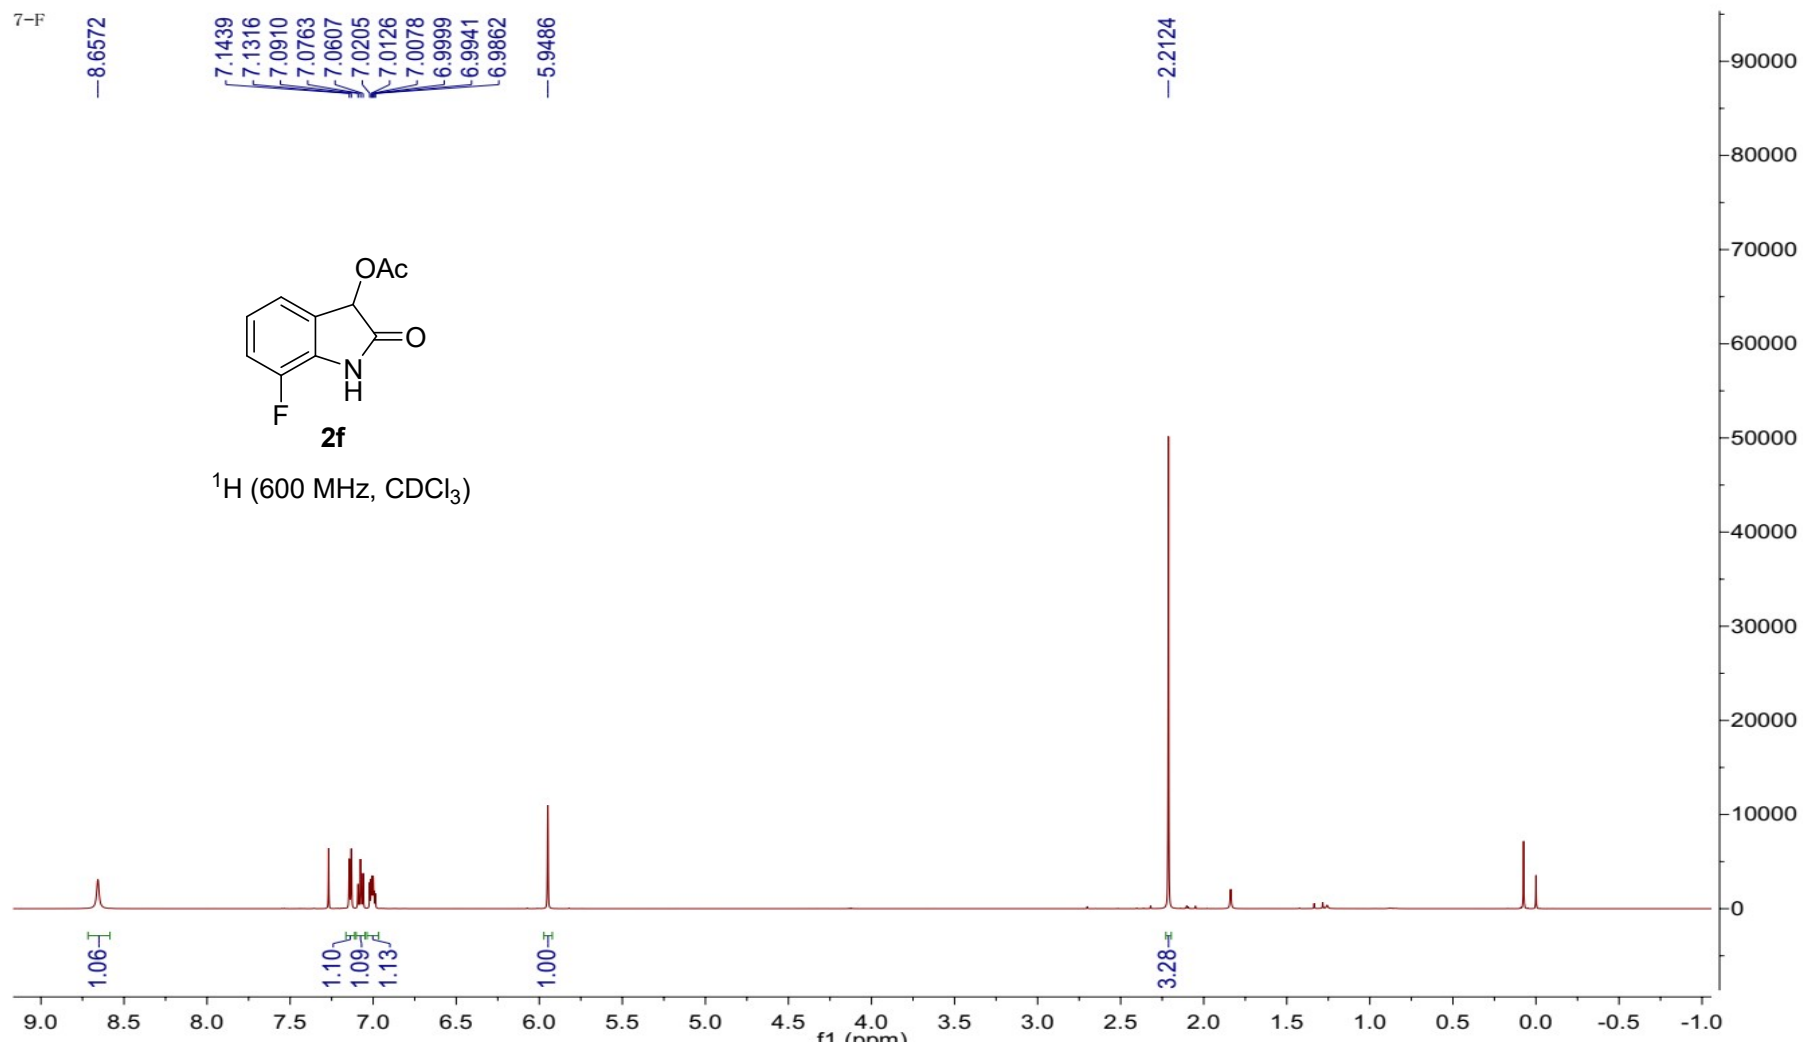

7-F

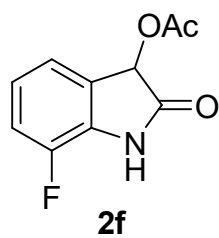

$^{13}\text{C}$  (150 MHz,  $\text{CDCl}_3$ )

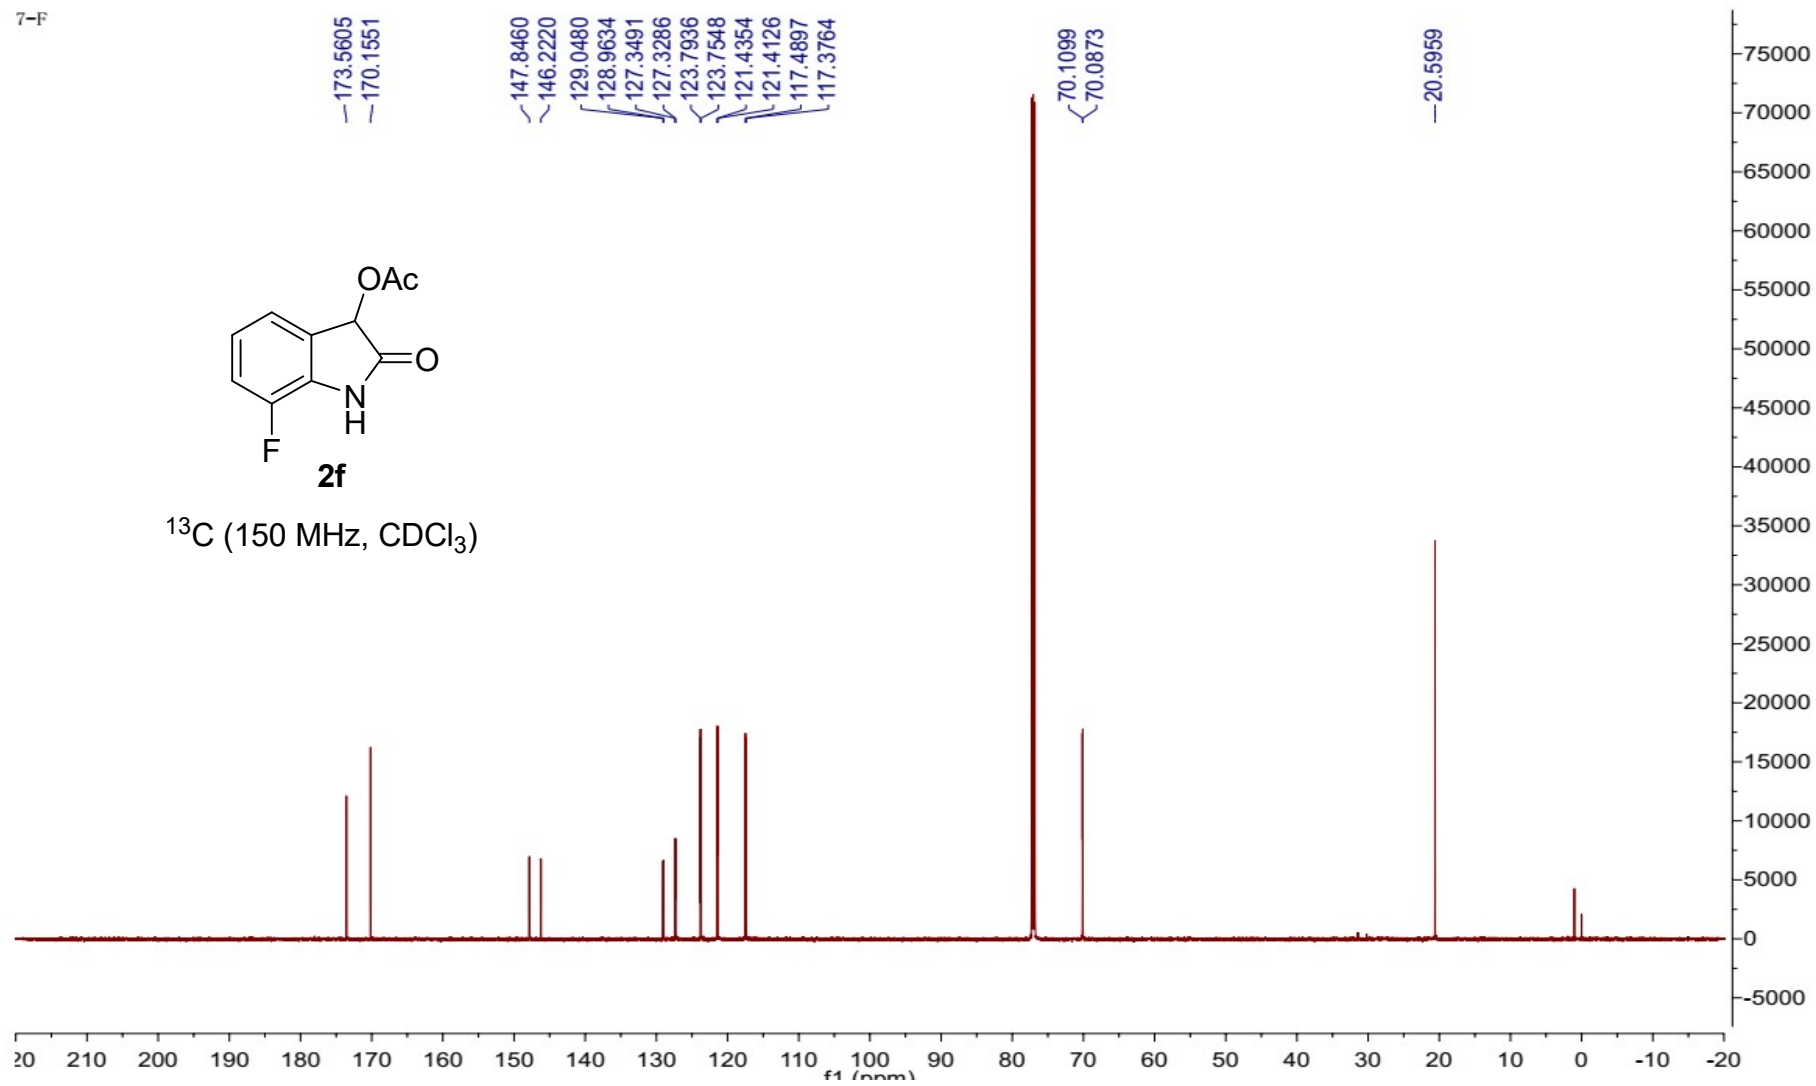

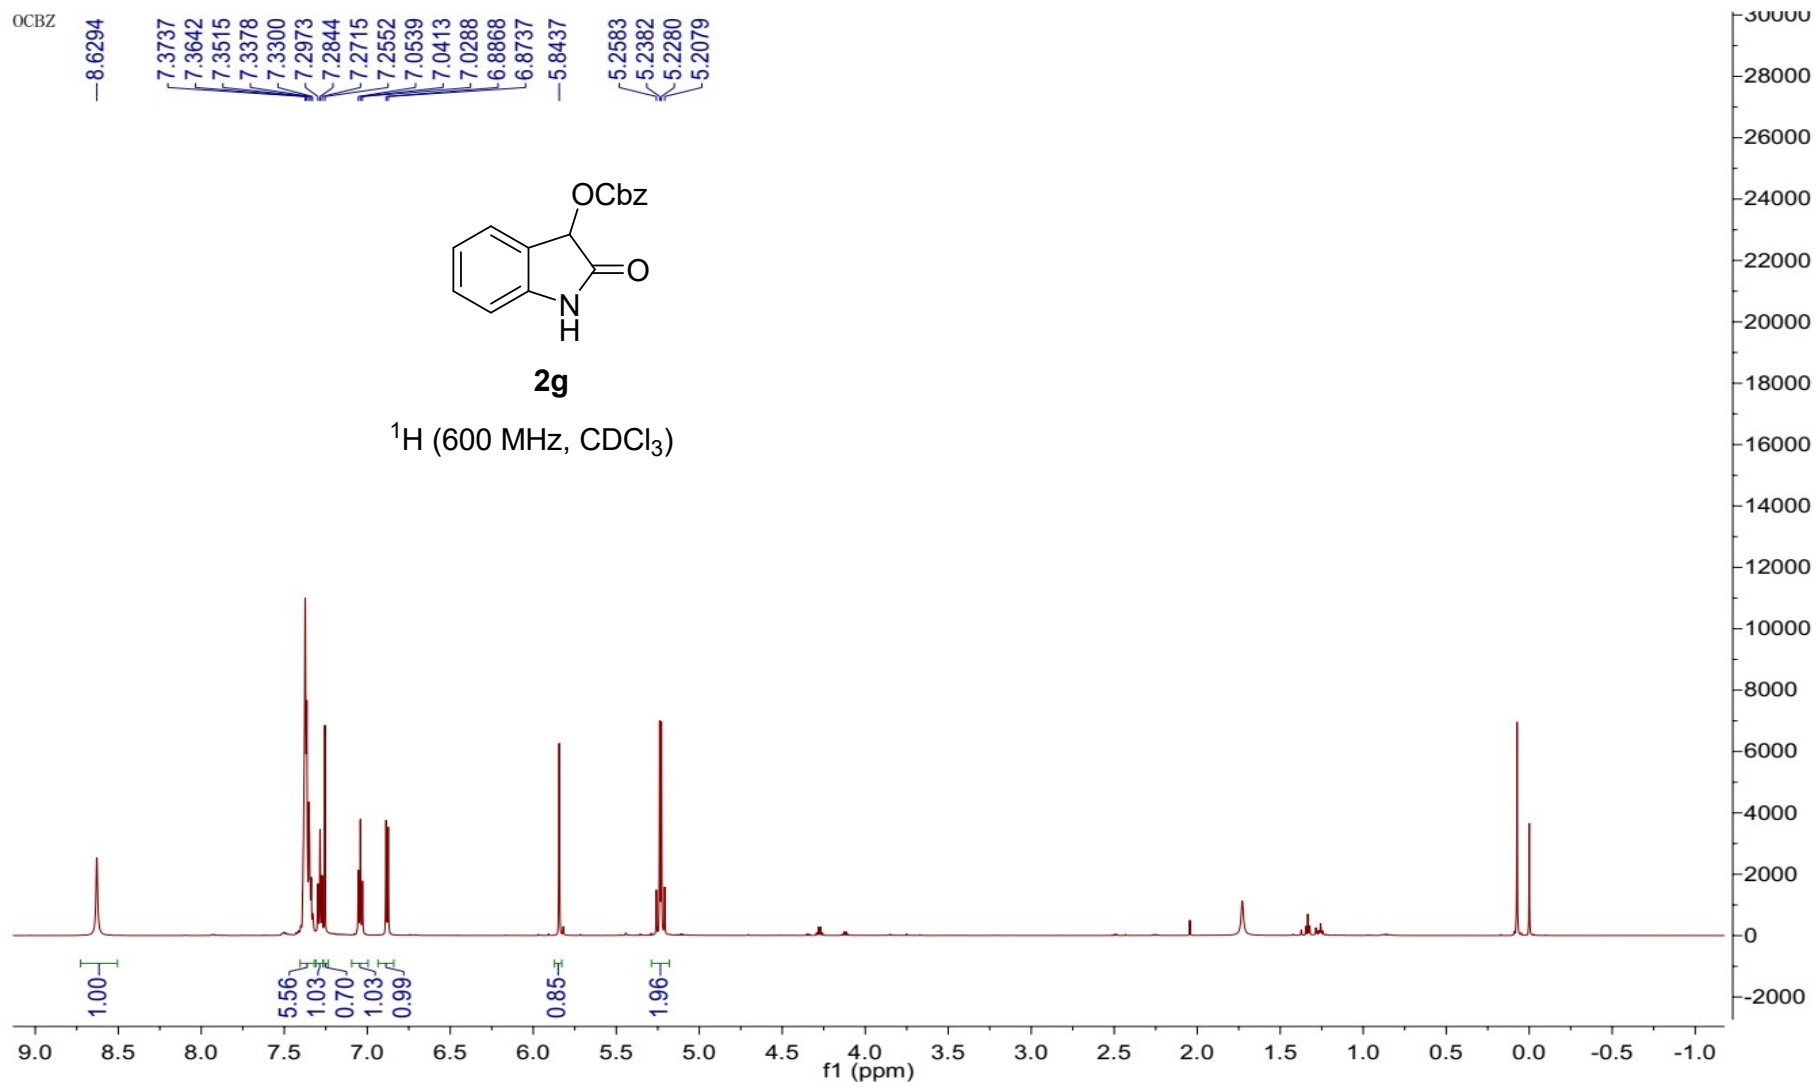

OCBZ

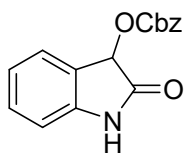

**2g**

$^{13}\text{C}$  (150 MHz,  $\text{CDCl}_3$ )

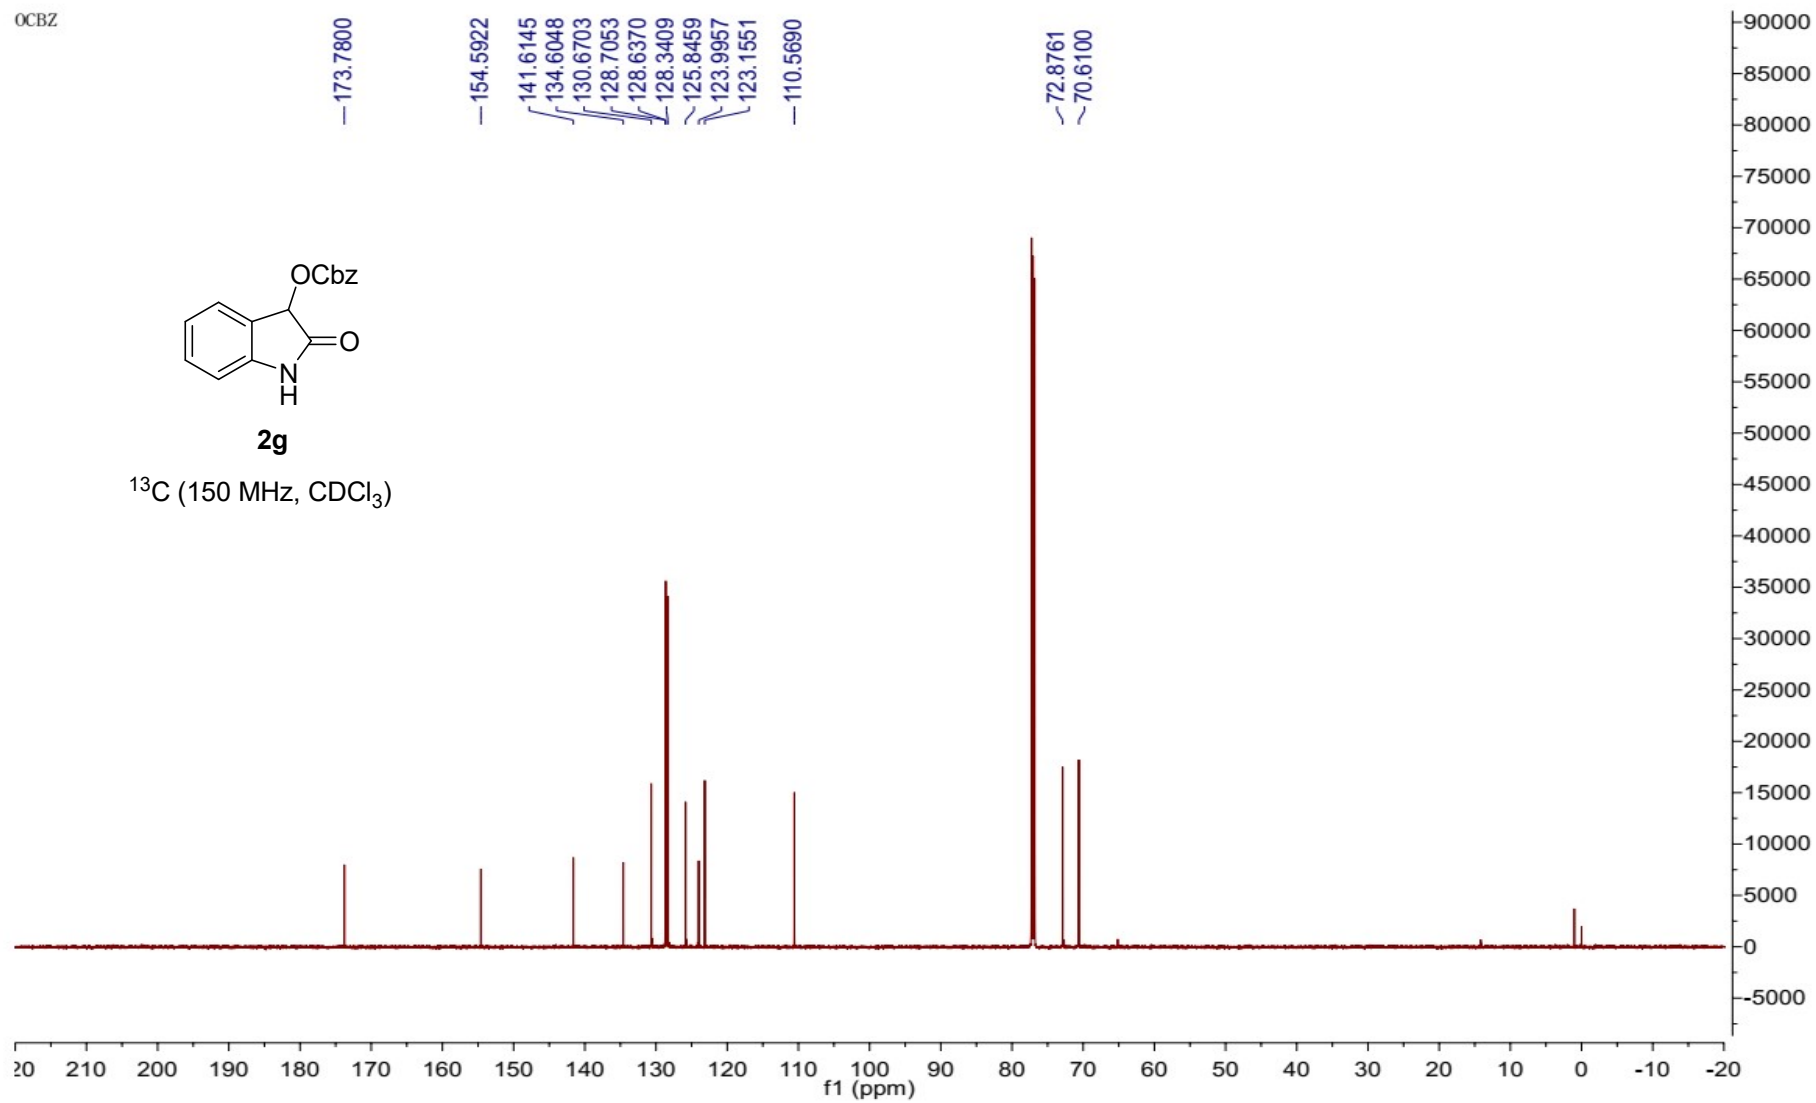

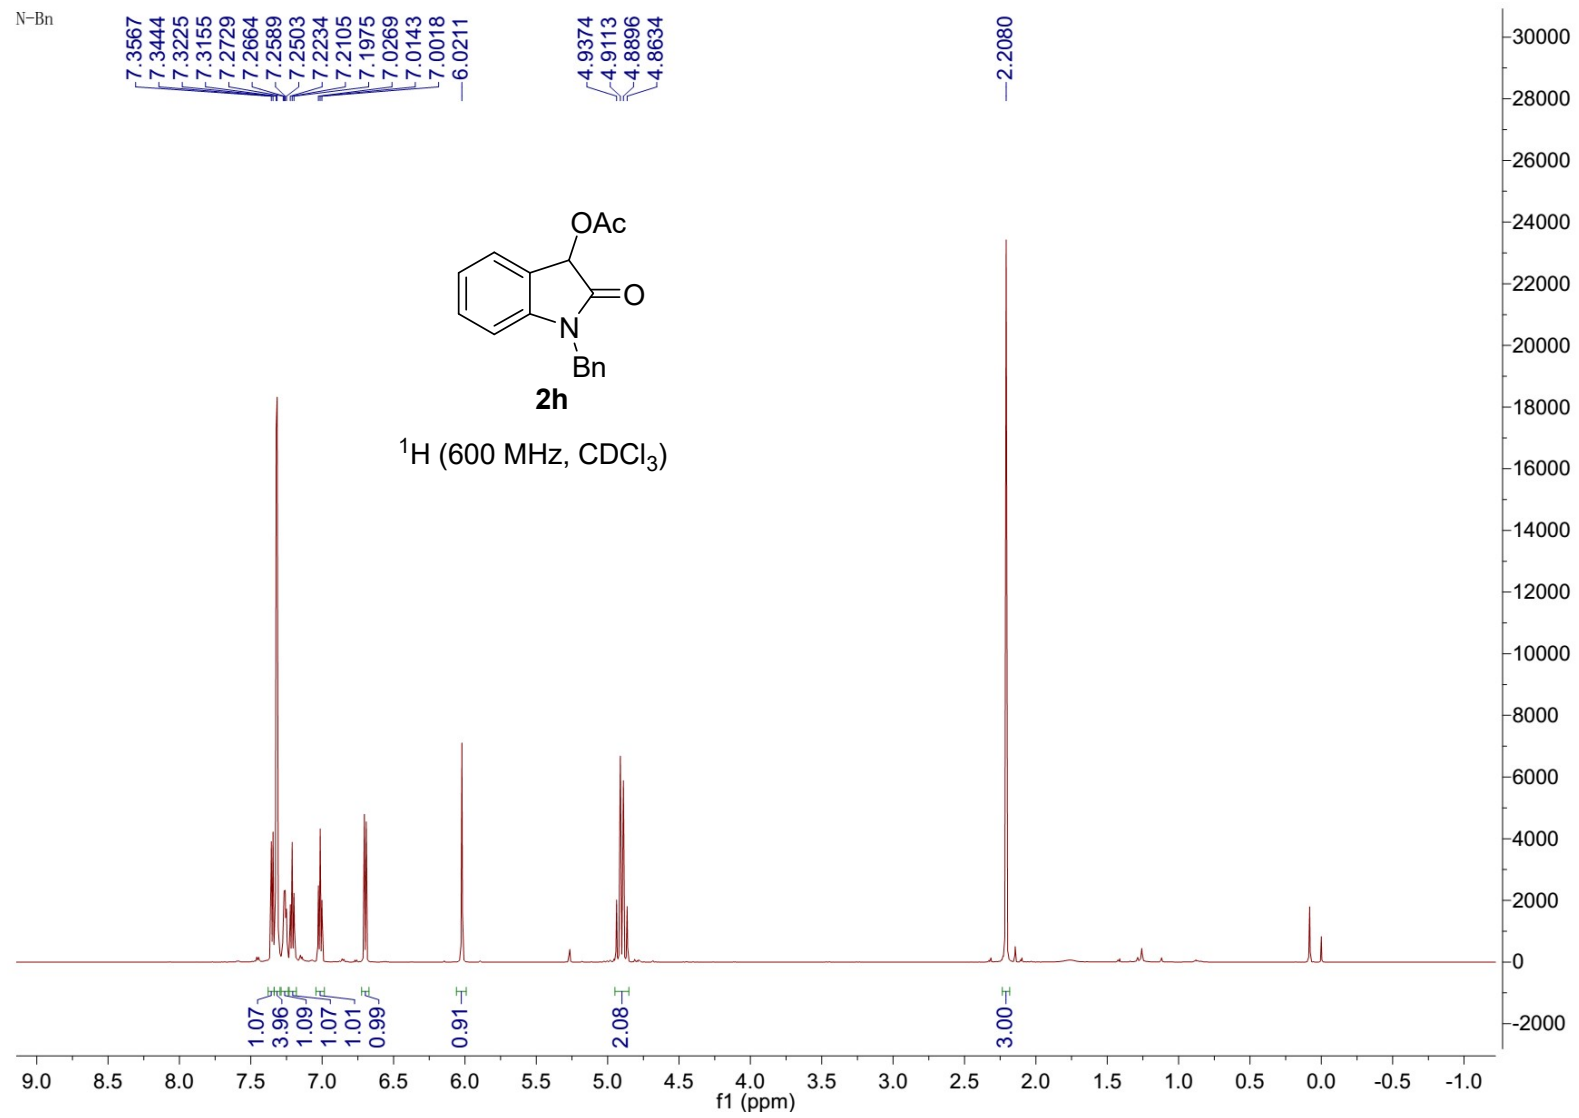



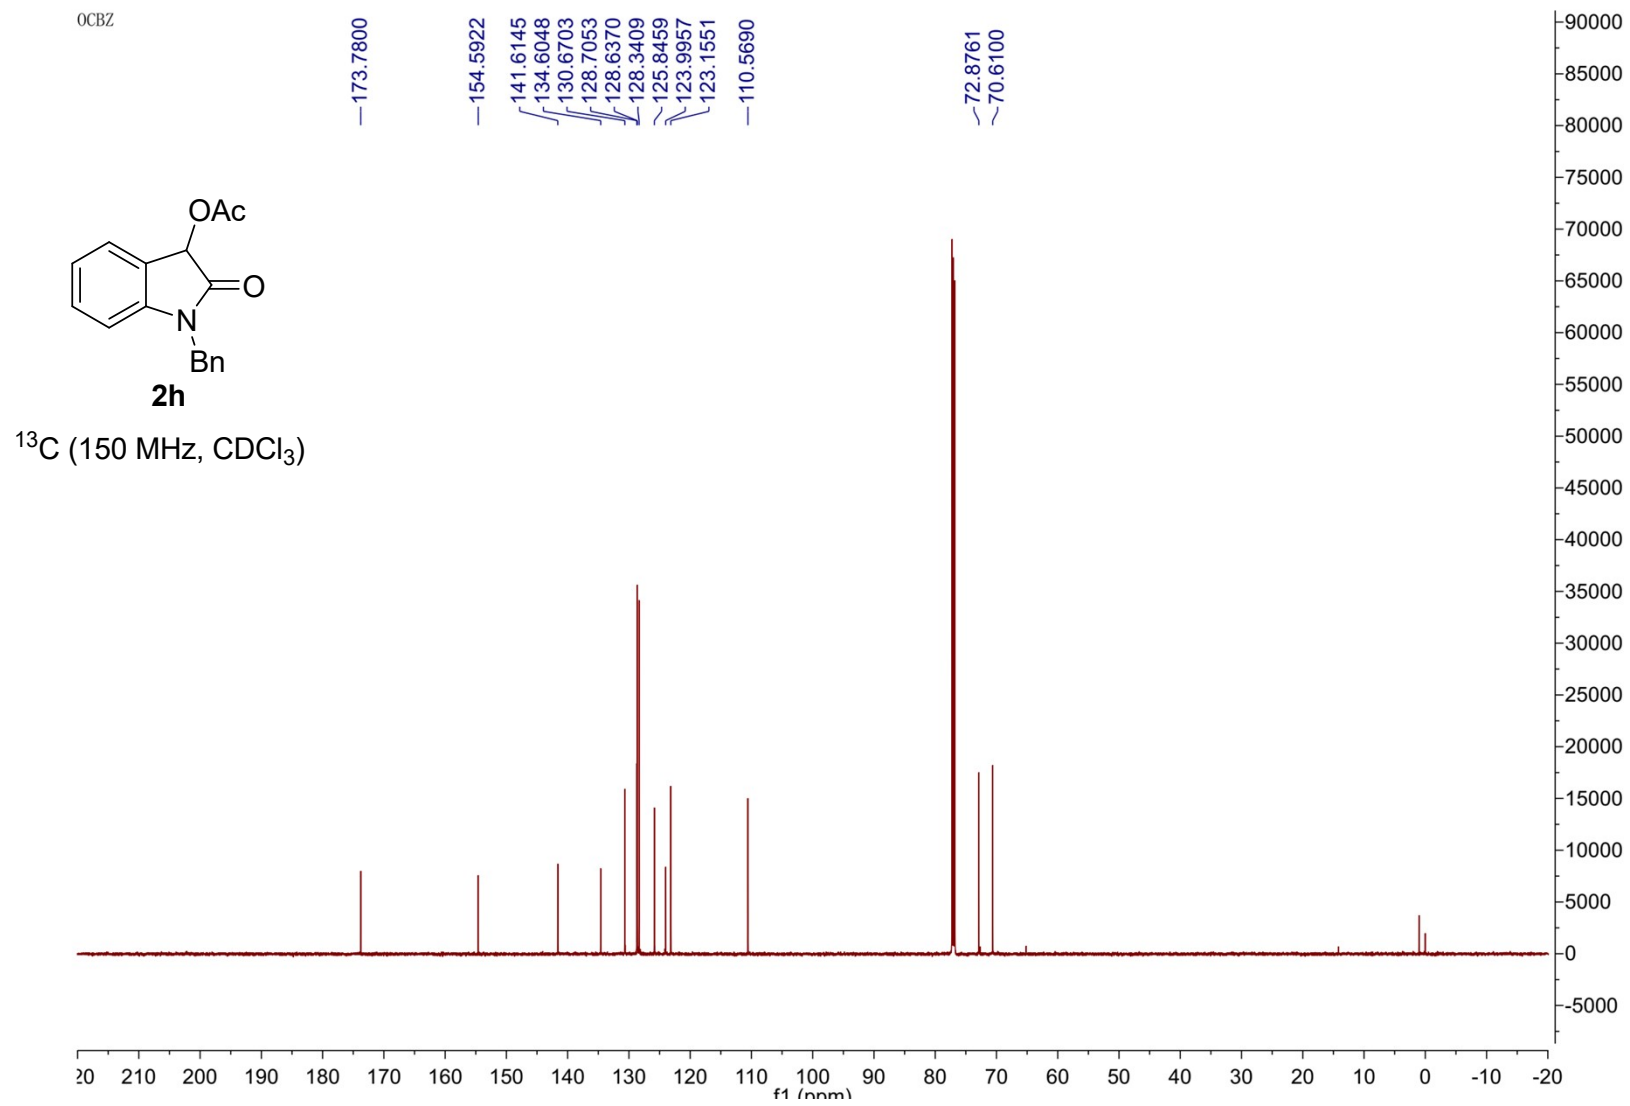

BTSZYL

9.3269  
9.3050  
9.2920  
9.2844  
9.2652  
9.2502

8.1124  
8.0994  
7.5949  
7.5825  
7.5704  
7.4558  
7.4432  
7.4305  
7.3838  
7.3715  
7.2686  
7.2554  
7.2435  
7.0327  
7.0202  
7.0078  
6.9389  
6.9259  
6.2159

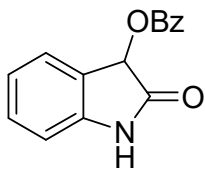

**2j**

<sup>1</sup>H (600 MHz, CDCl<sub>3</sub>)

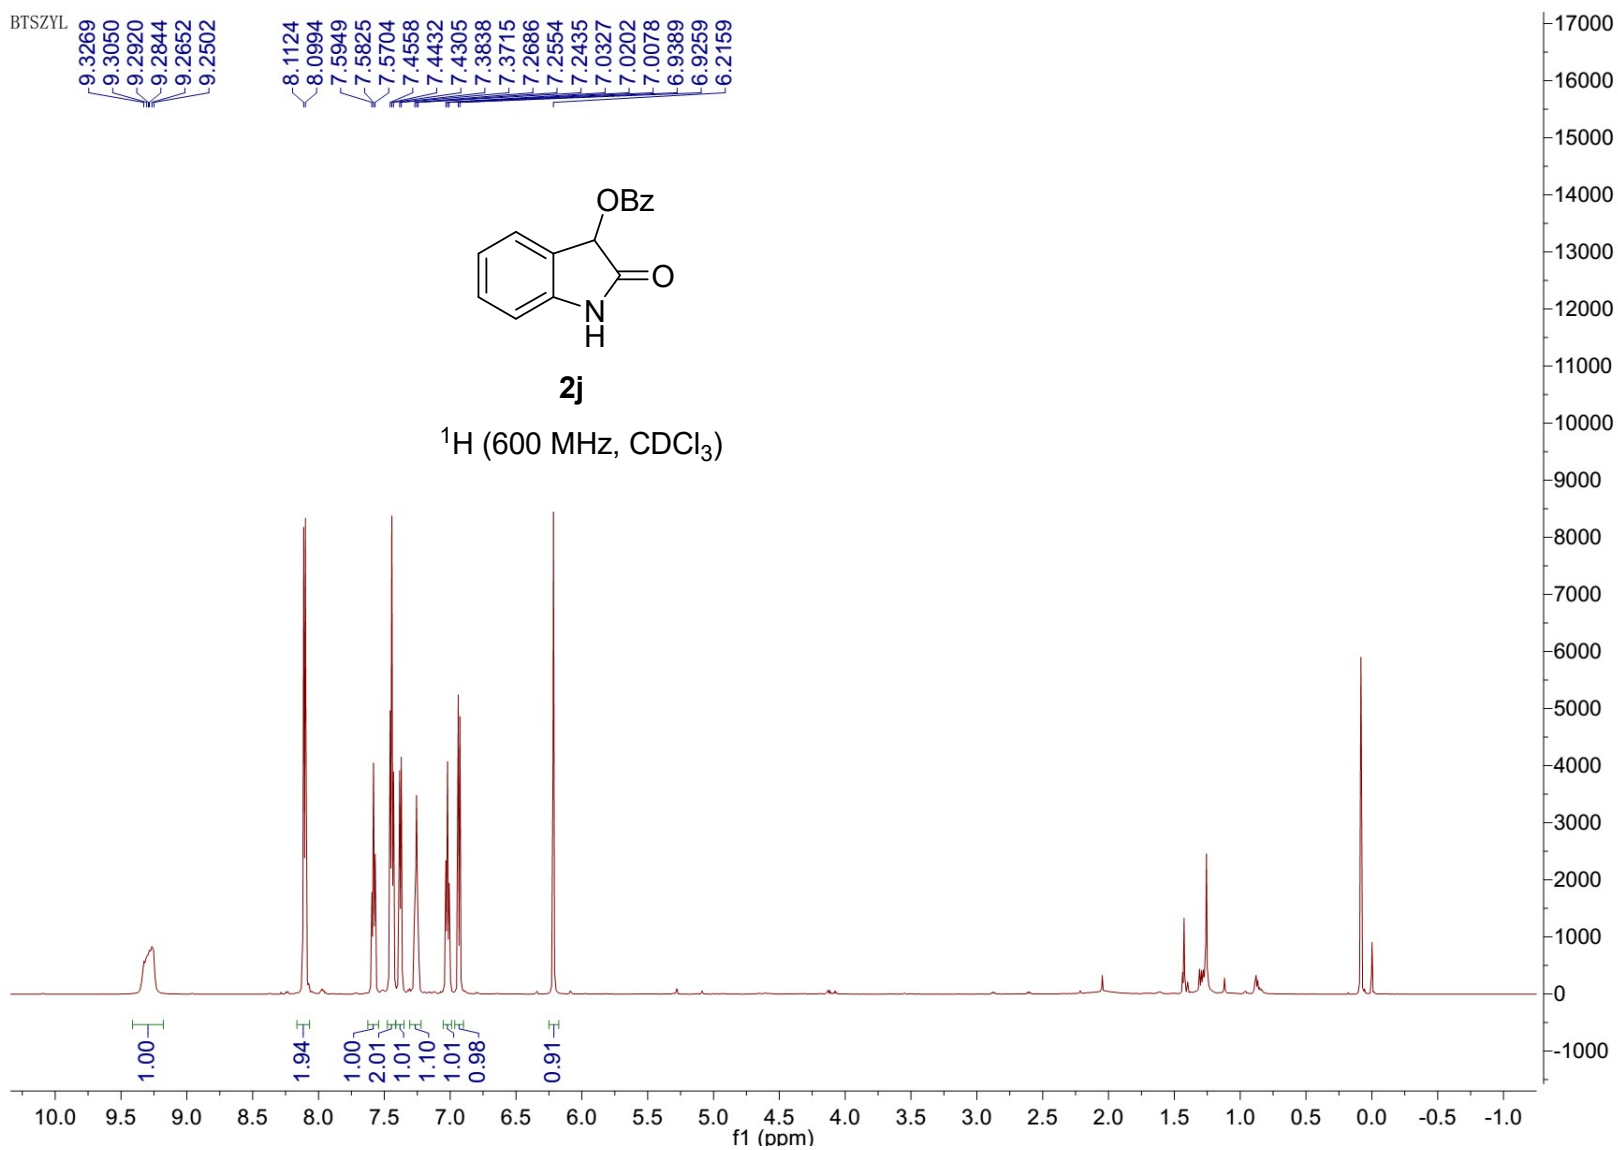

N-Bn

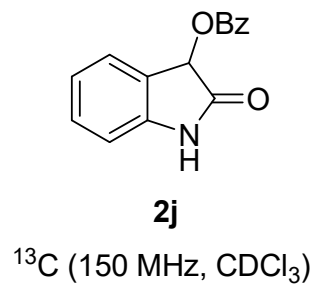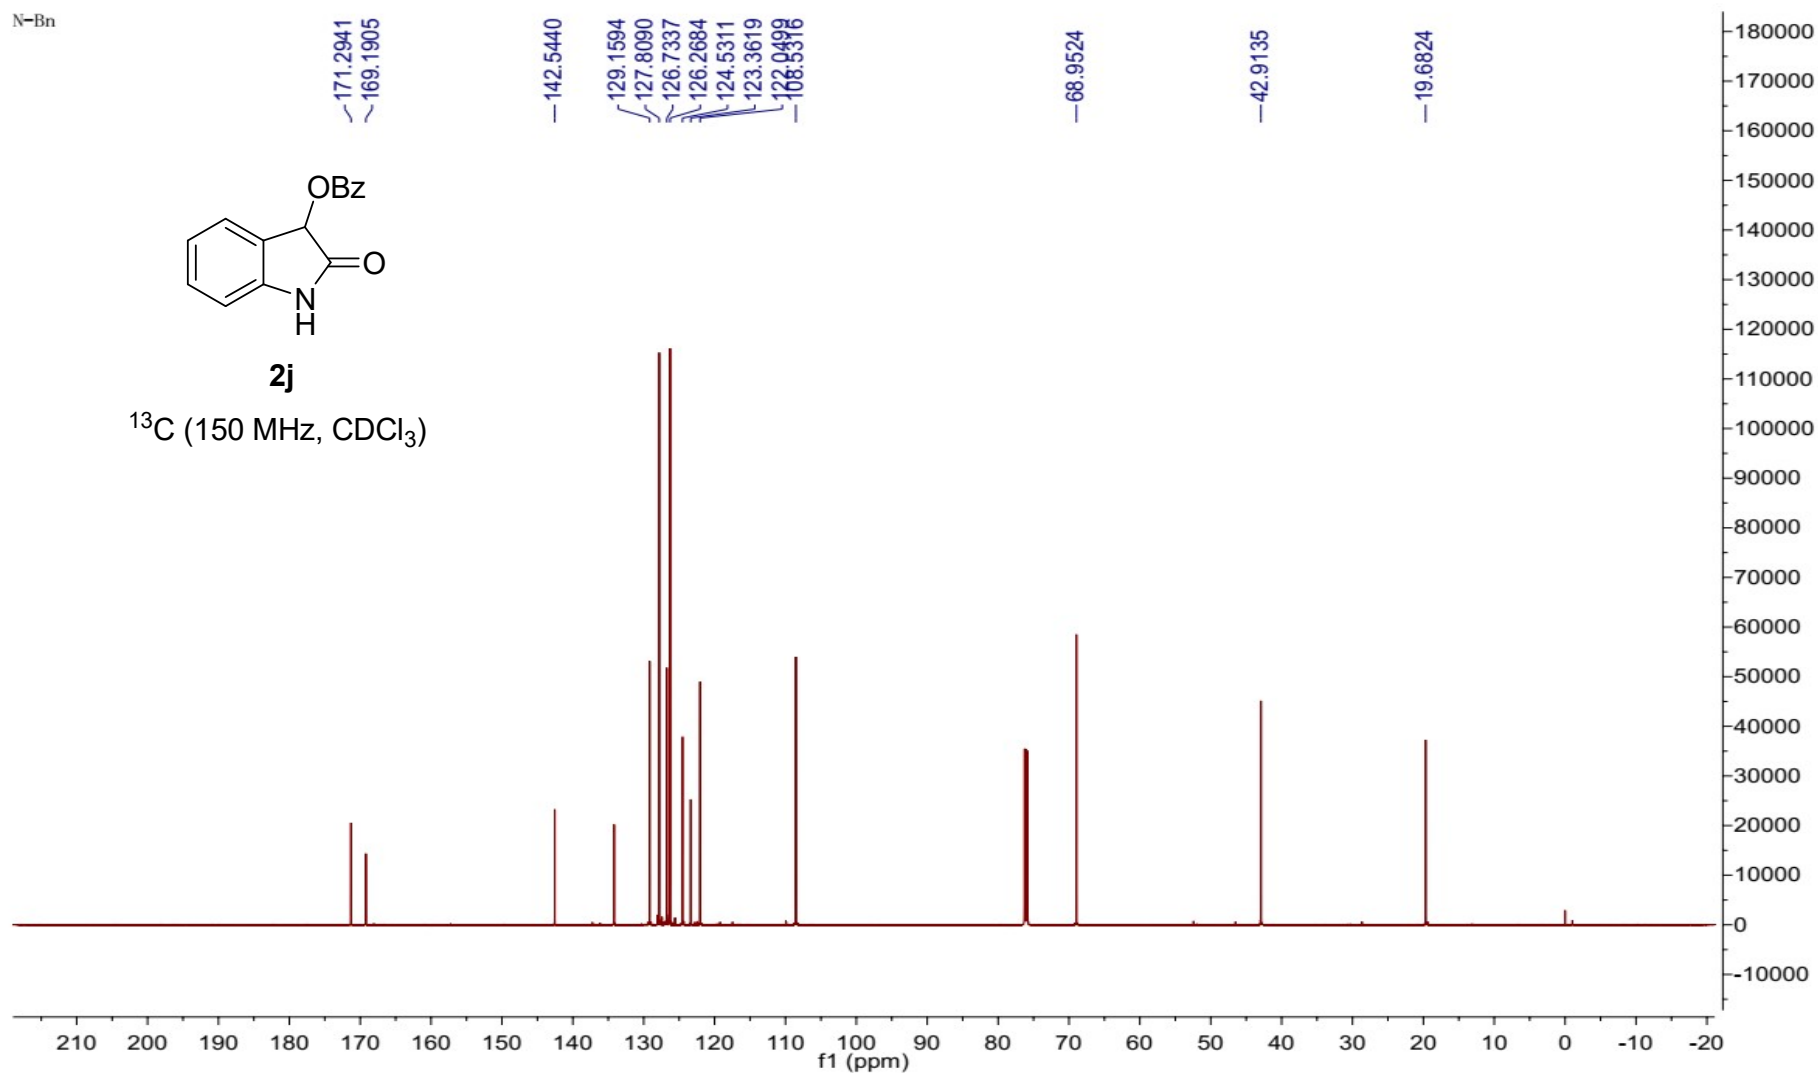

N-0105-A

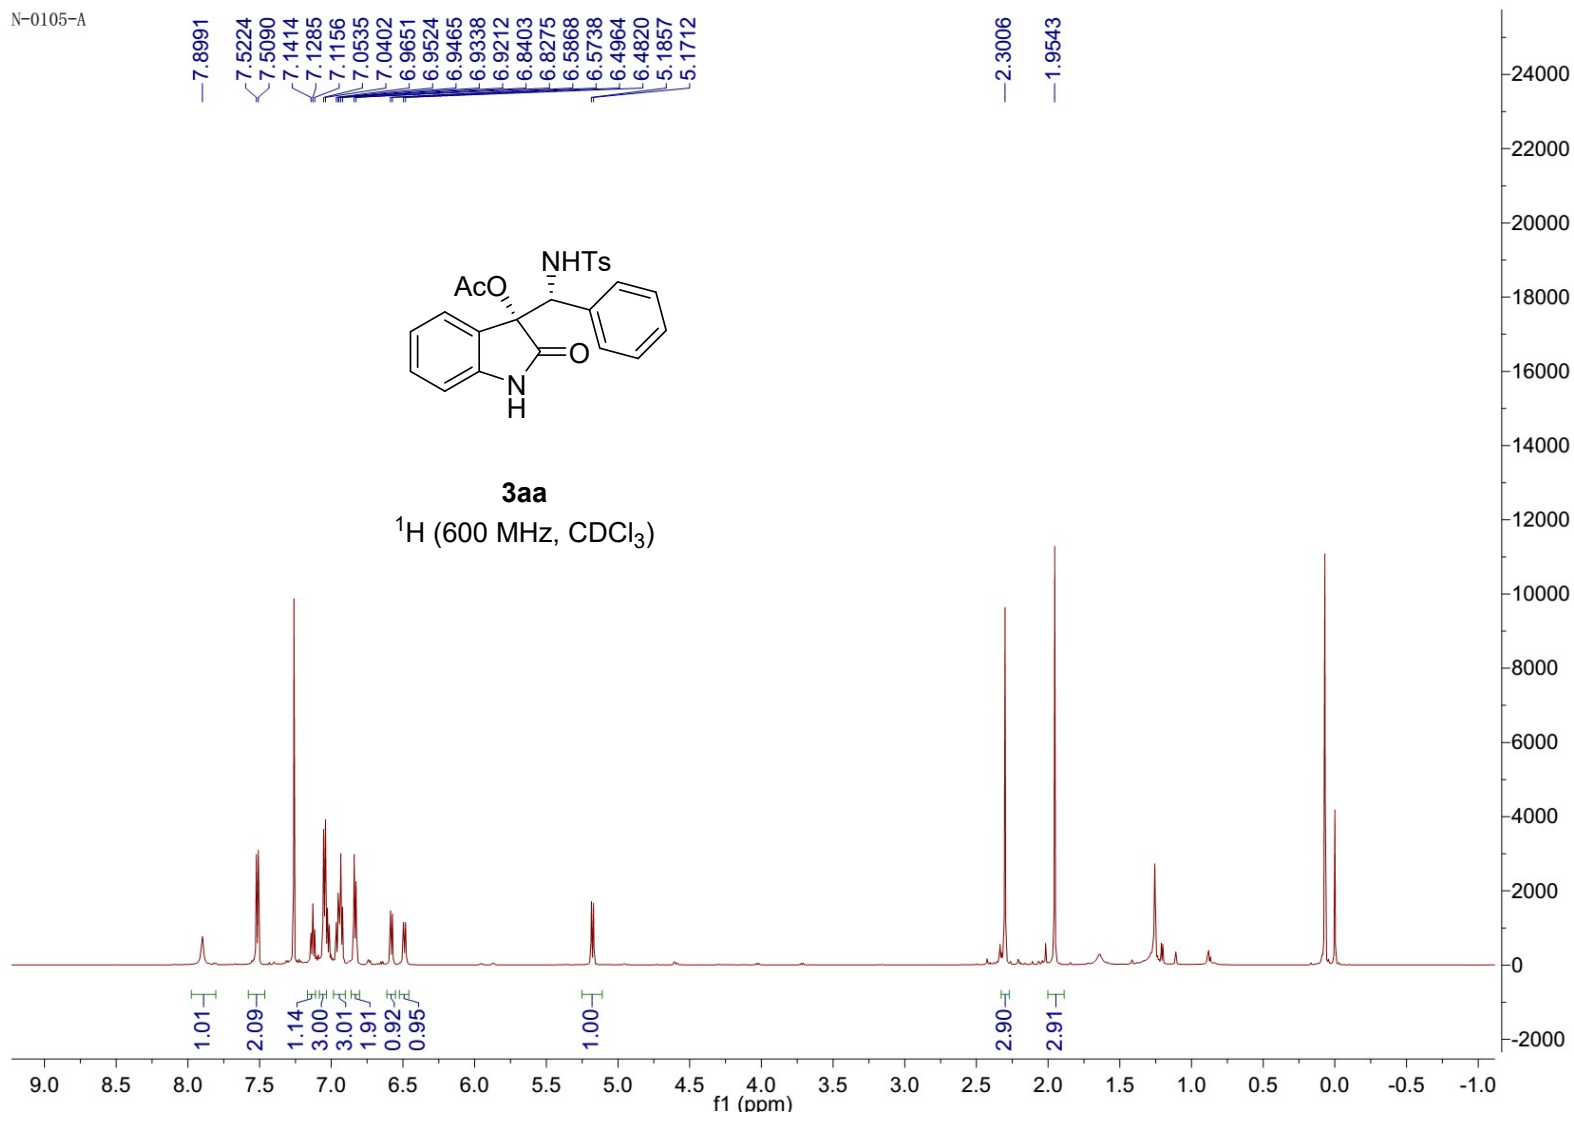

N-0105-A

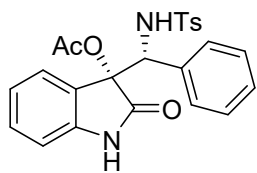

**3aa**

$^{13}\text{C}$  (150 MHz,  $\text{CDCl}_3$ )

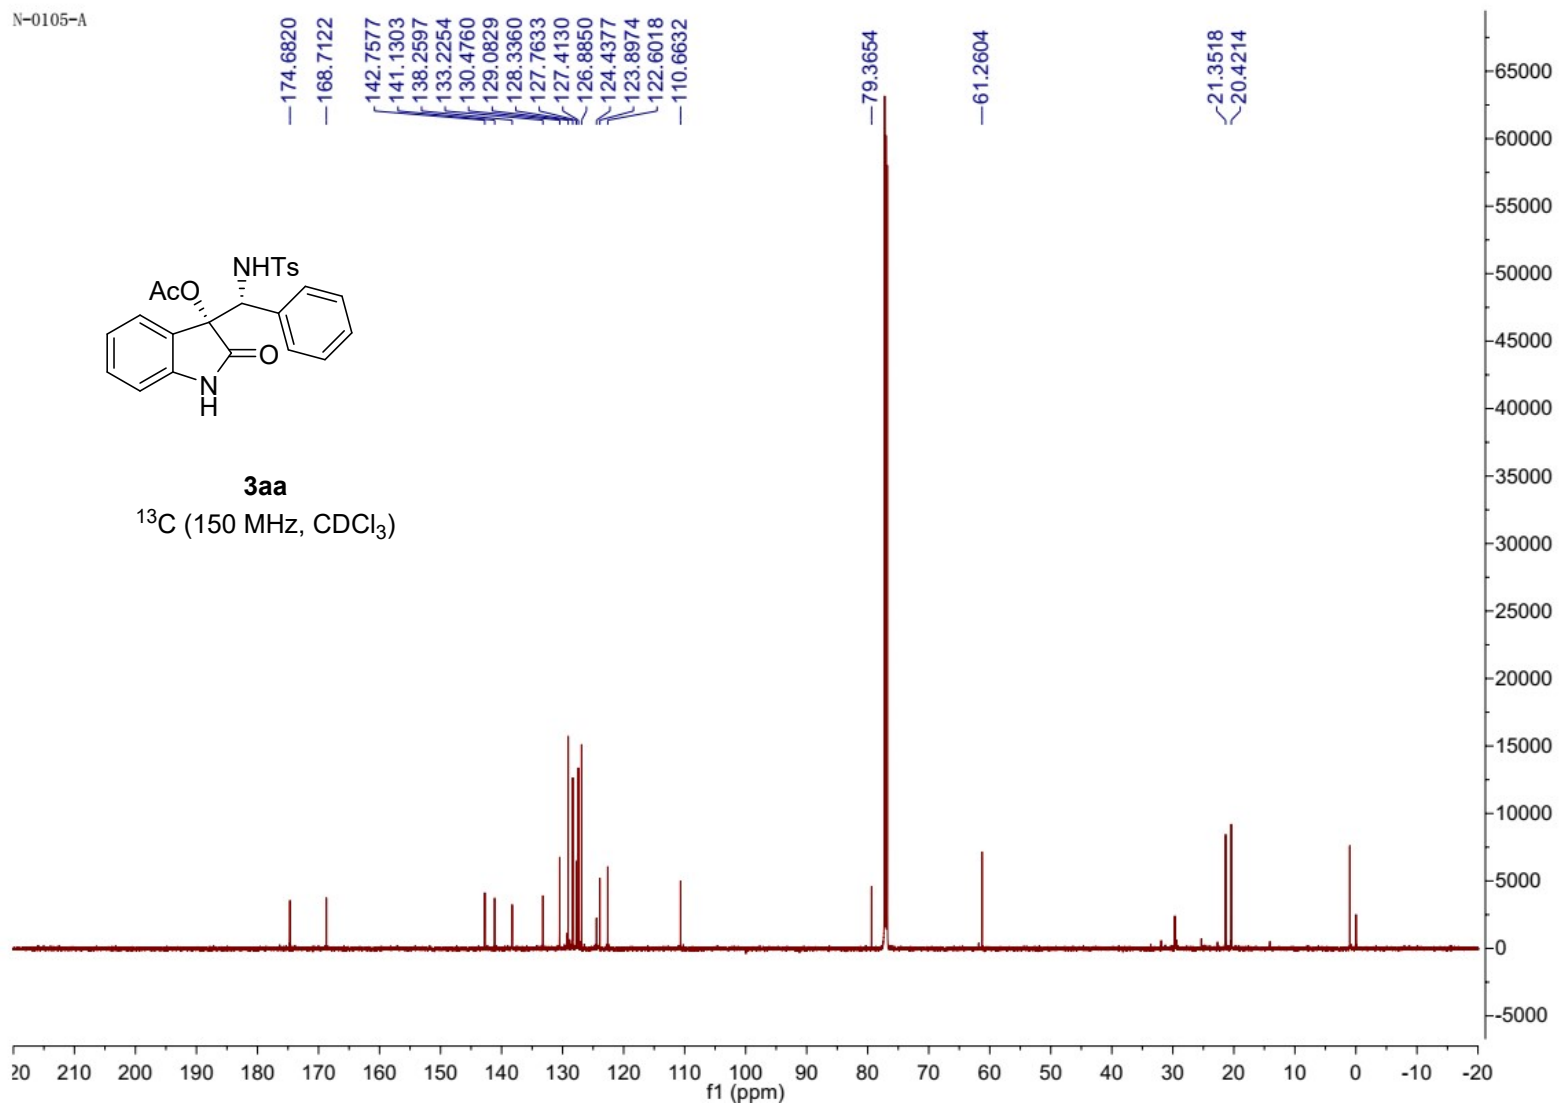

N-1225-A

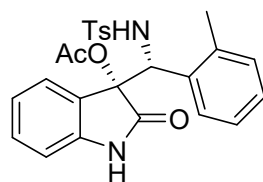

**3ba**

$^1\text{H}$  (600 MHz,  $\text{CDCl}_3$ )

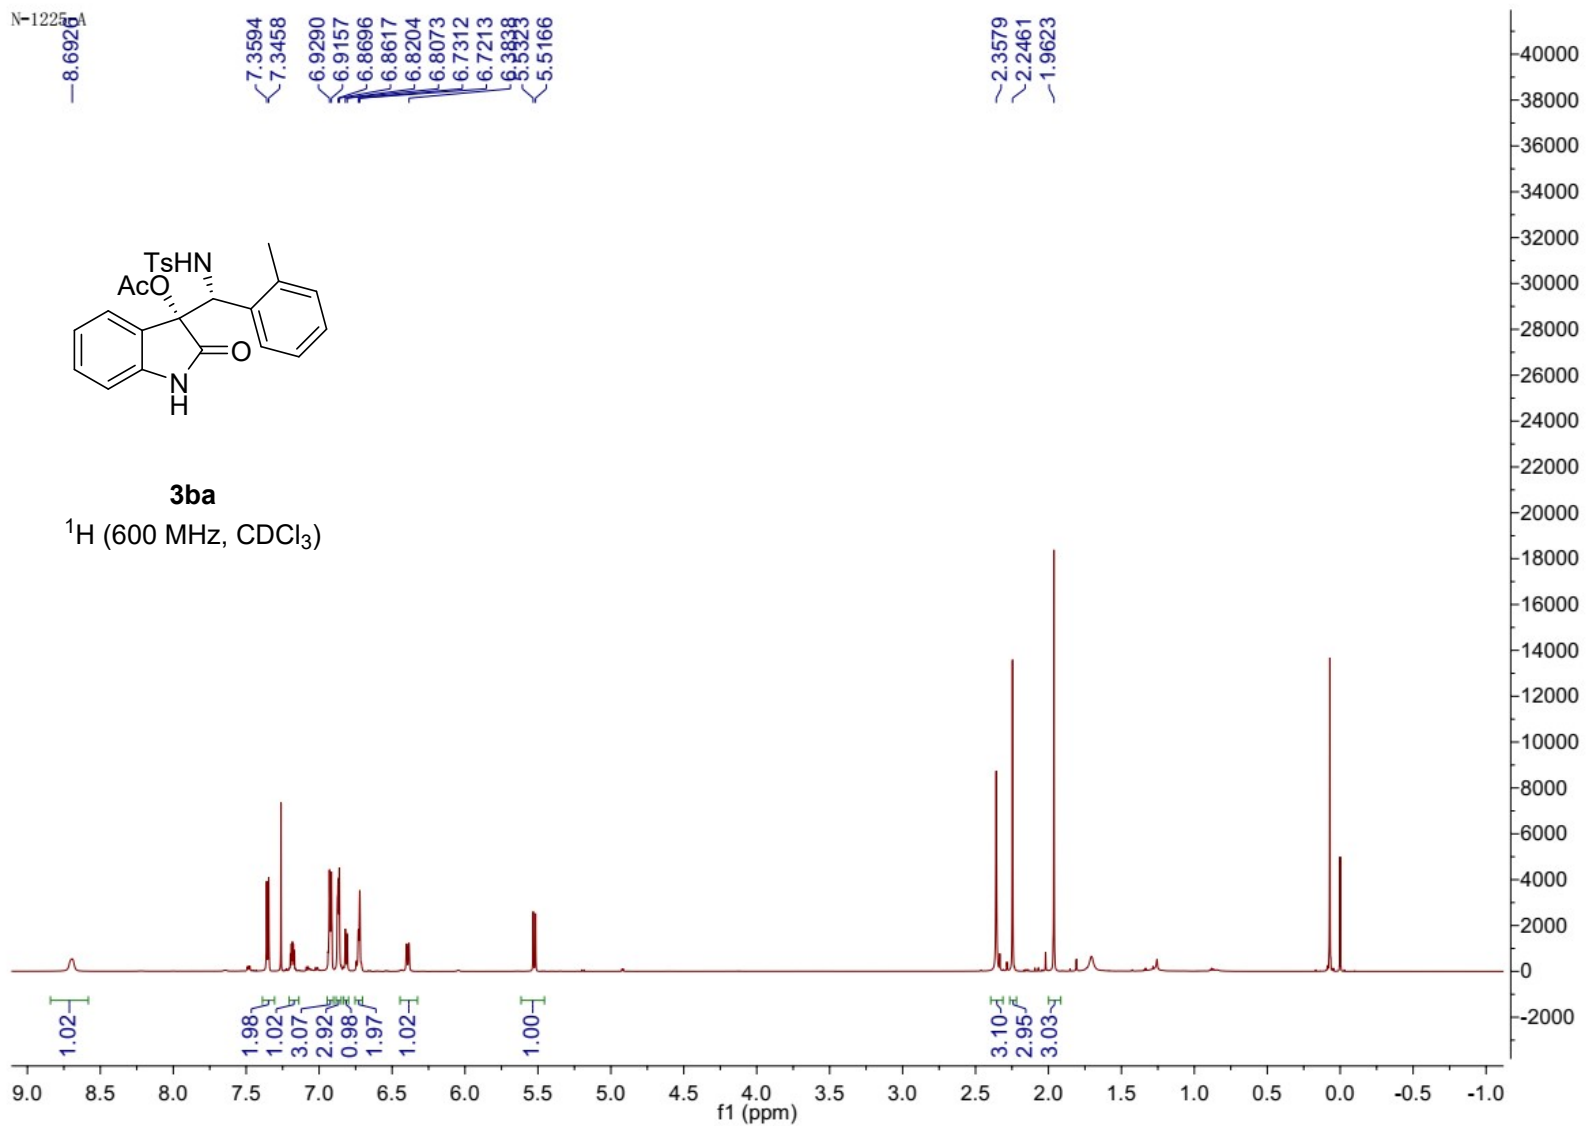

N-1225-A

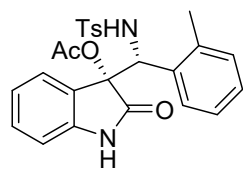

**3ba**

$^{13}\text{C}$  (150 MHz,  $\text{CDCl}_3$ )

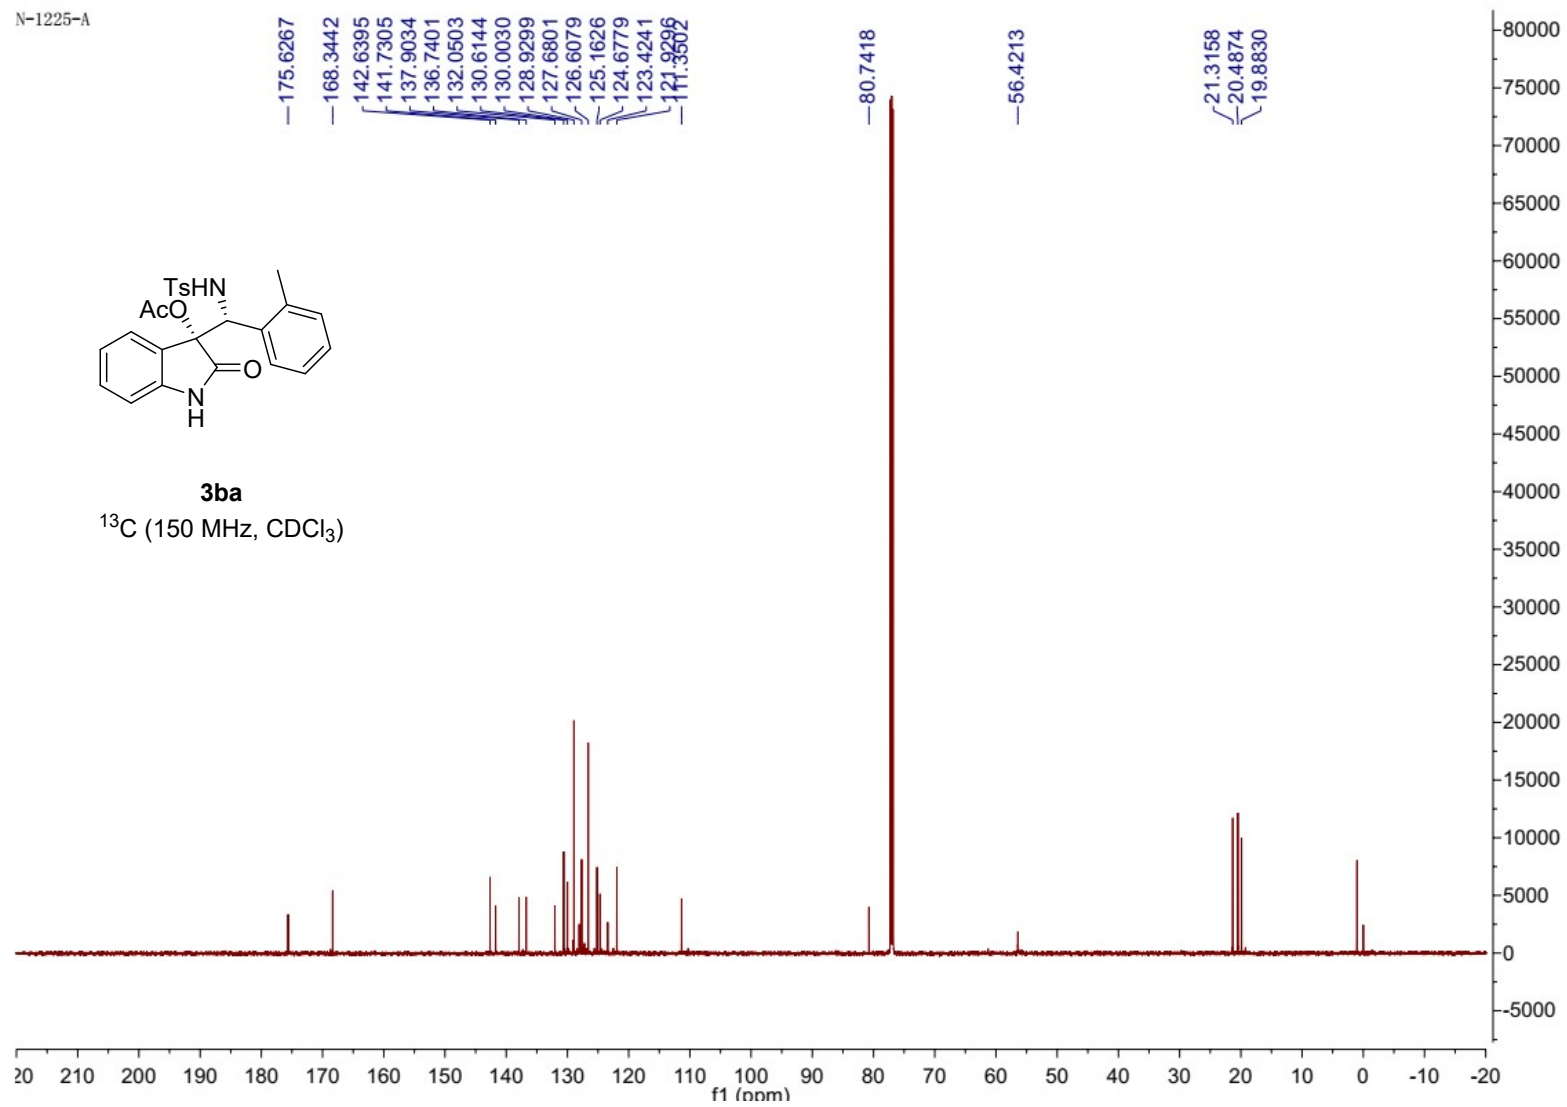

N-0316-A

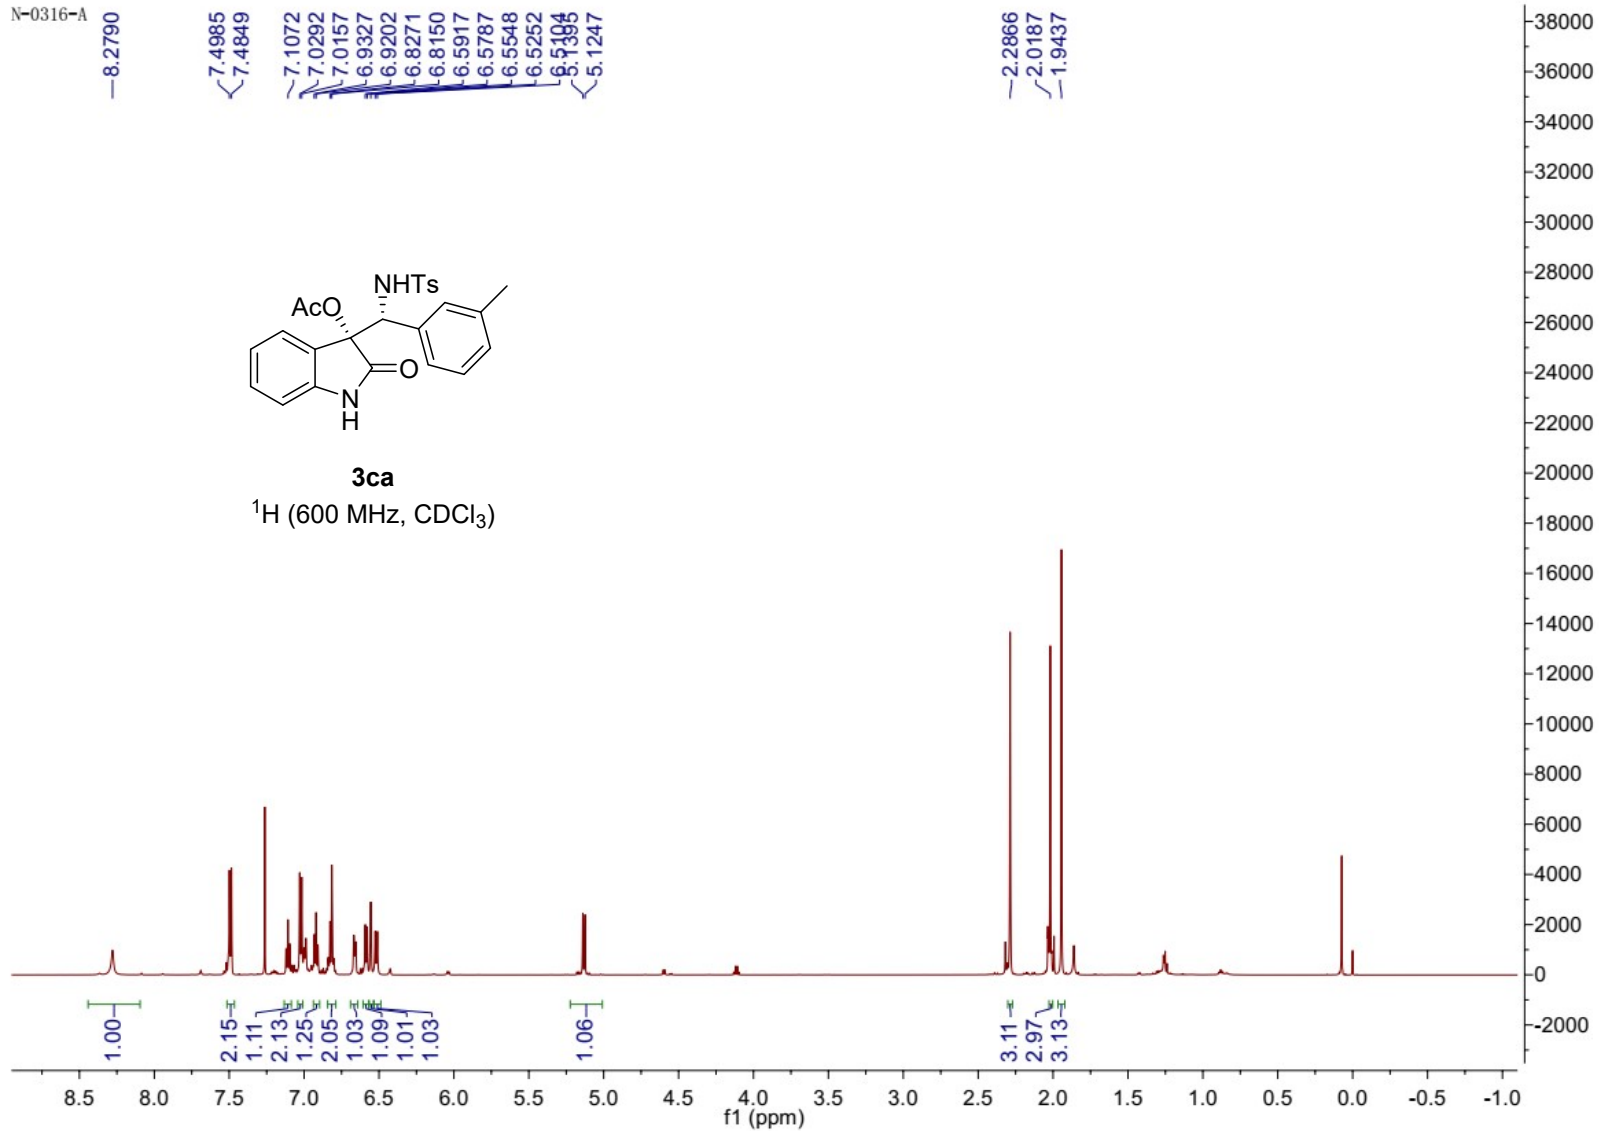



N-0316-A

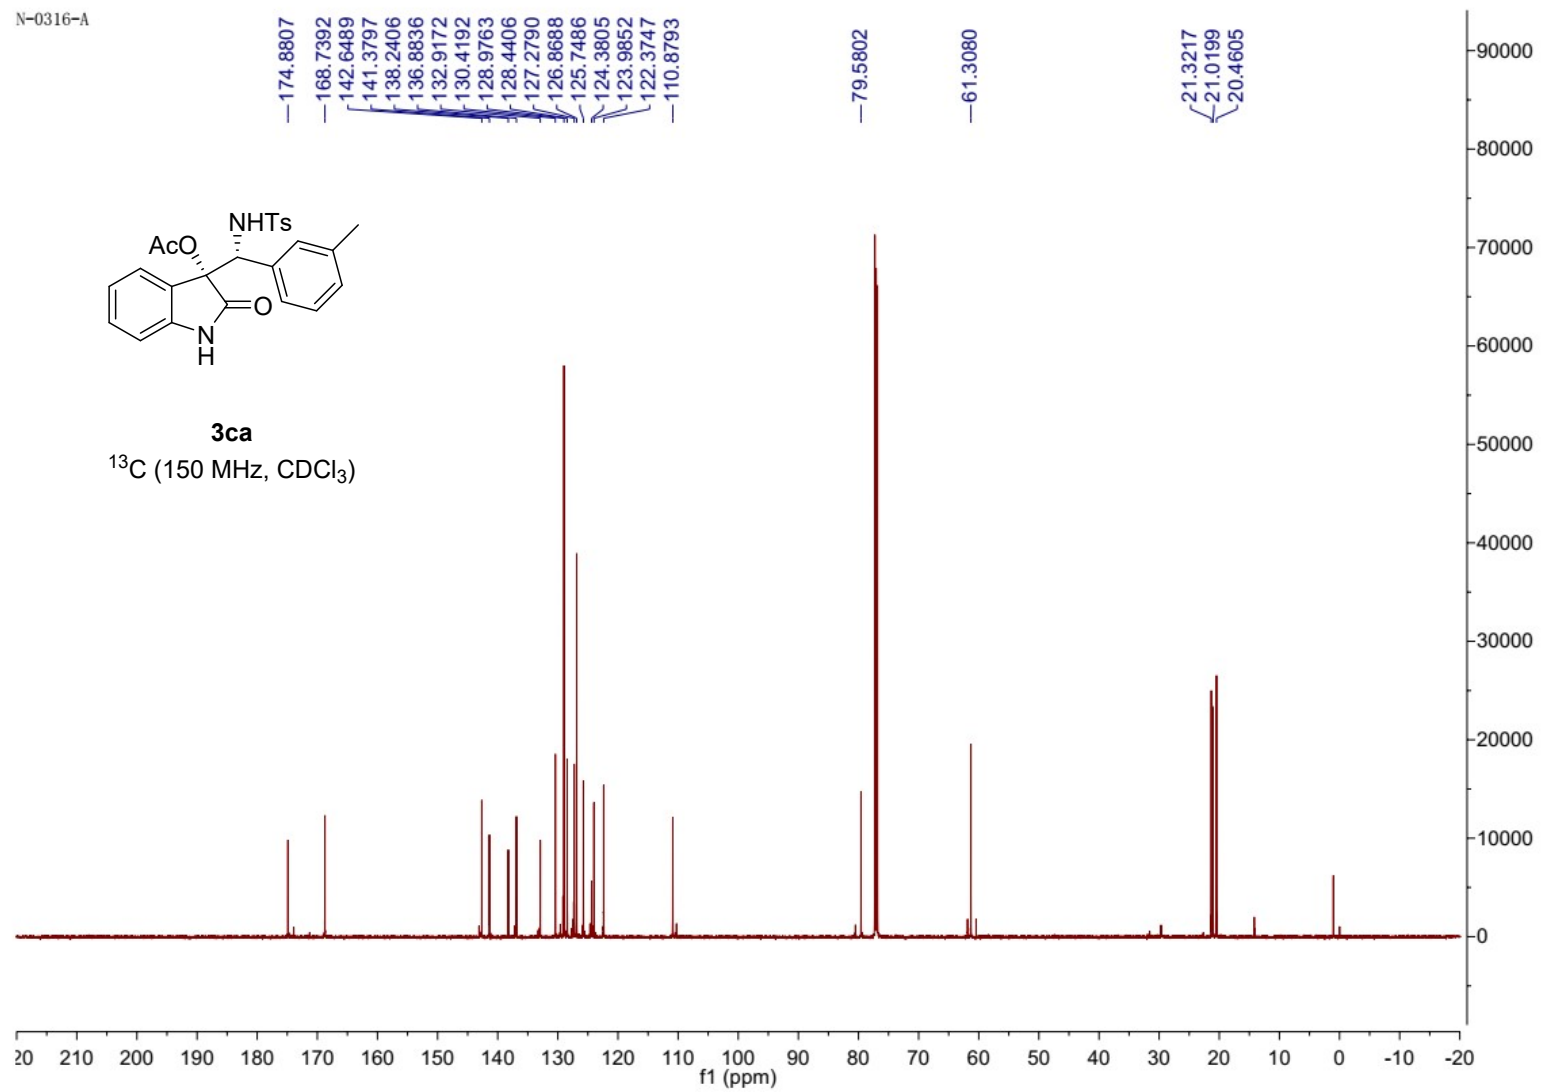

1225-B

8.9739  
7.3411  
7.3274  
7.1835  
7.1820  
6.9177  
6.9072  
6.8941  
6.8799  
6.8674  
6.8599  
6.8528  
6.8484  
6.8397  
6.8361  
6.7072  
6.6791  
6.4639  
5.5220

2.3774  
2.2327  
1.9602

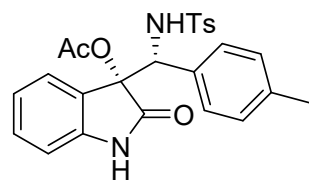

**3da**

<sup>1</sup>H (600 MHz, CDCl<sub>3</sub>)

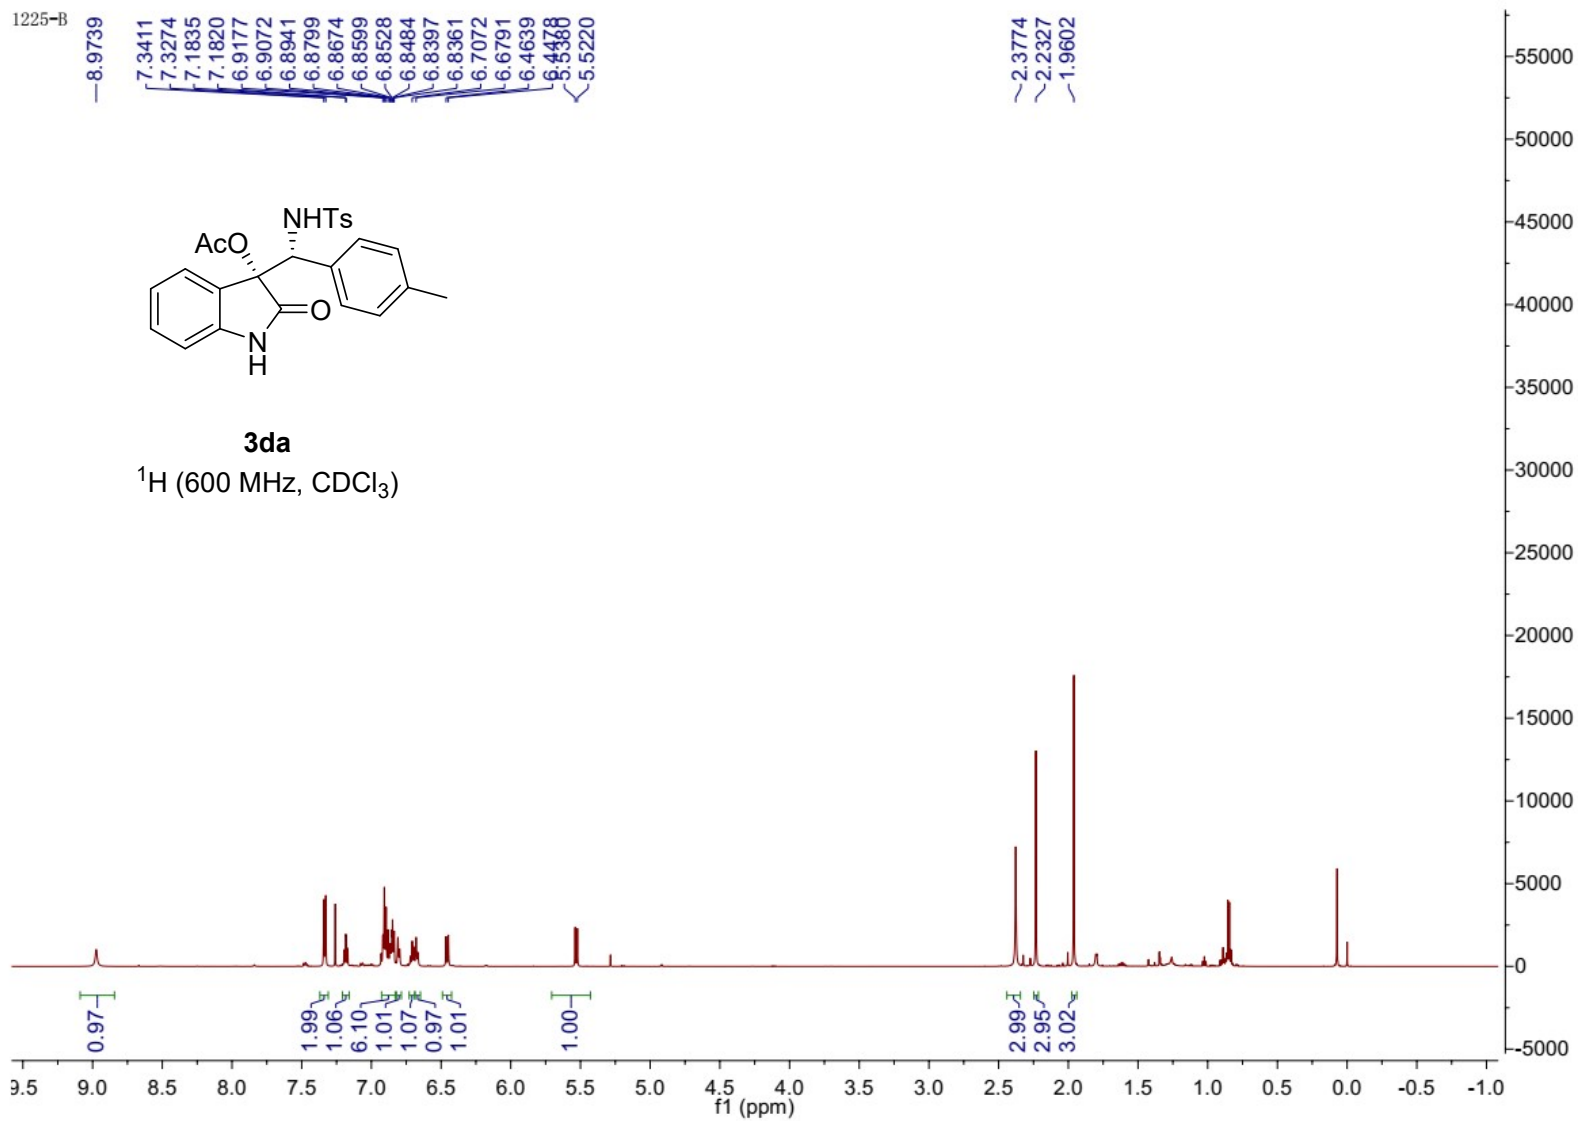

N-1225B

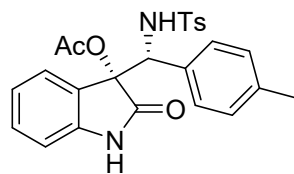

**3da**

<sup>13</sup>C (150 MHz, CDCl<sub>3</sub>)

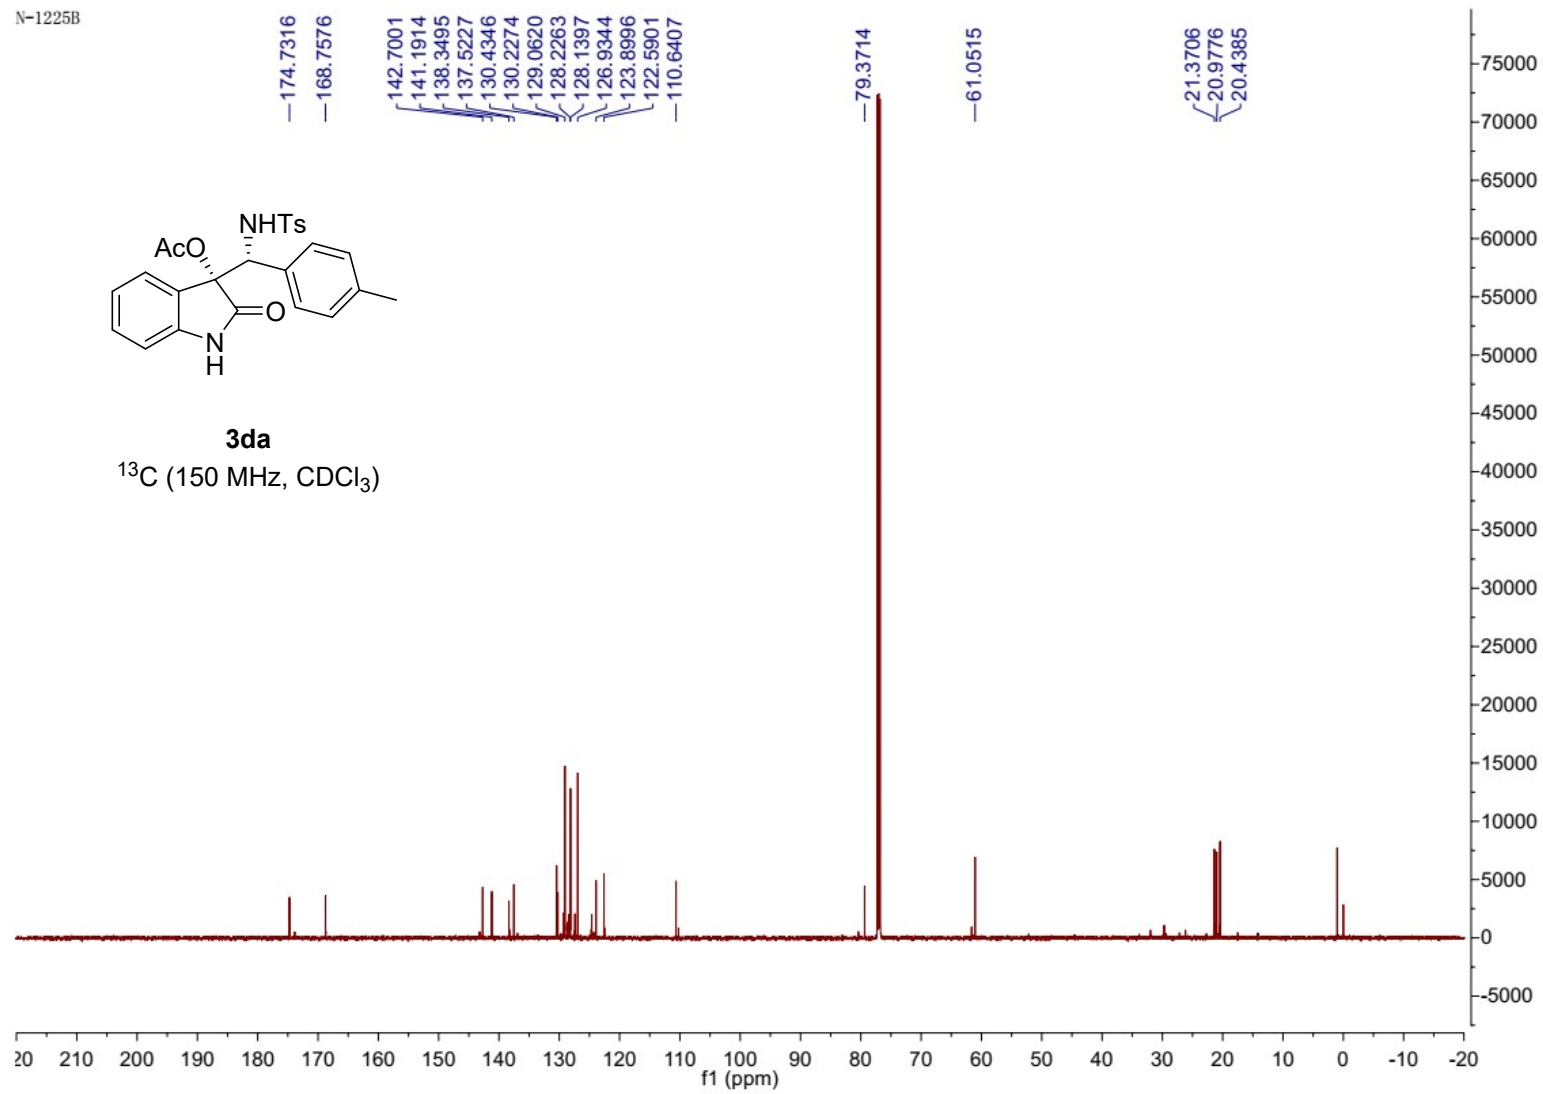

1226-A

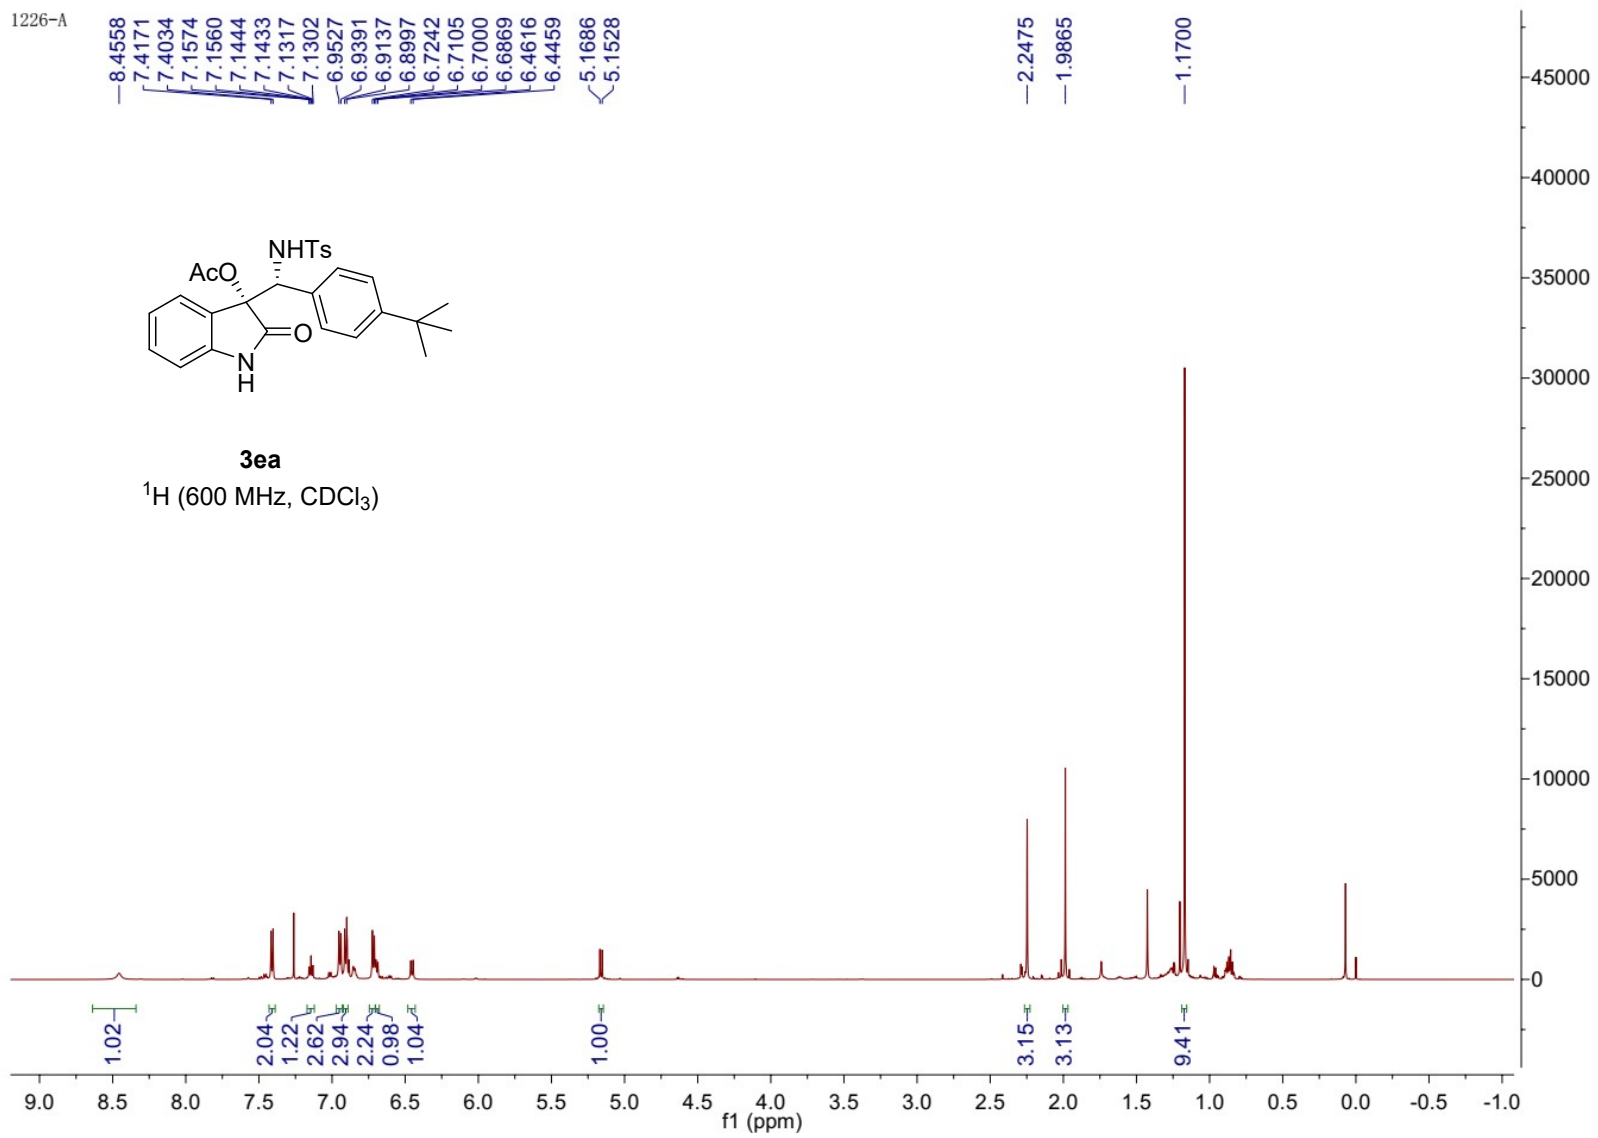

N-1226-A

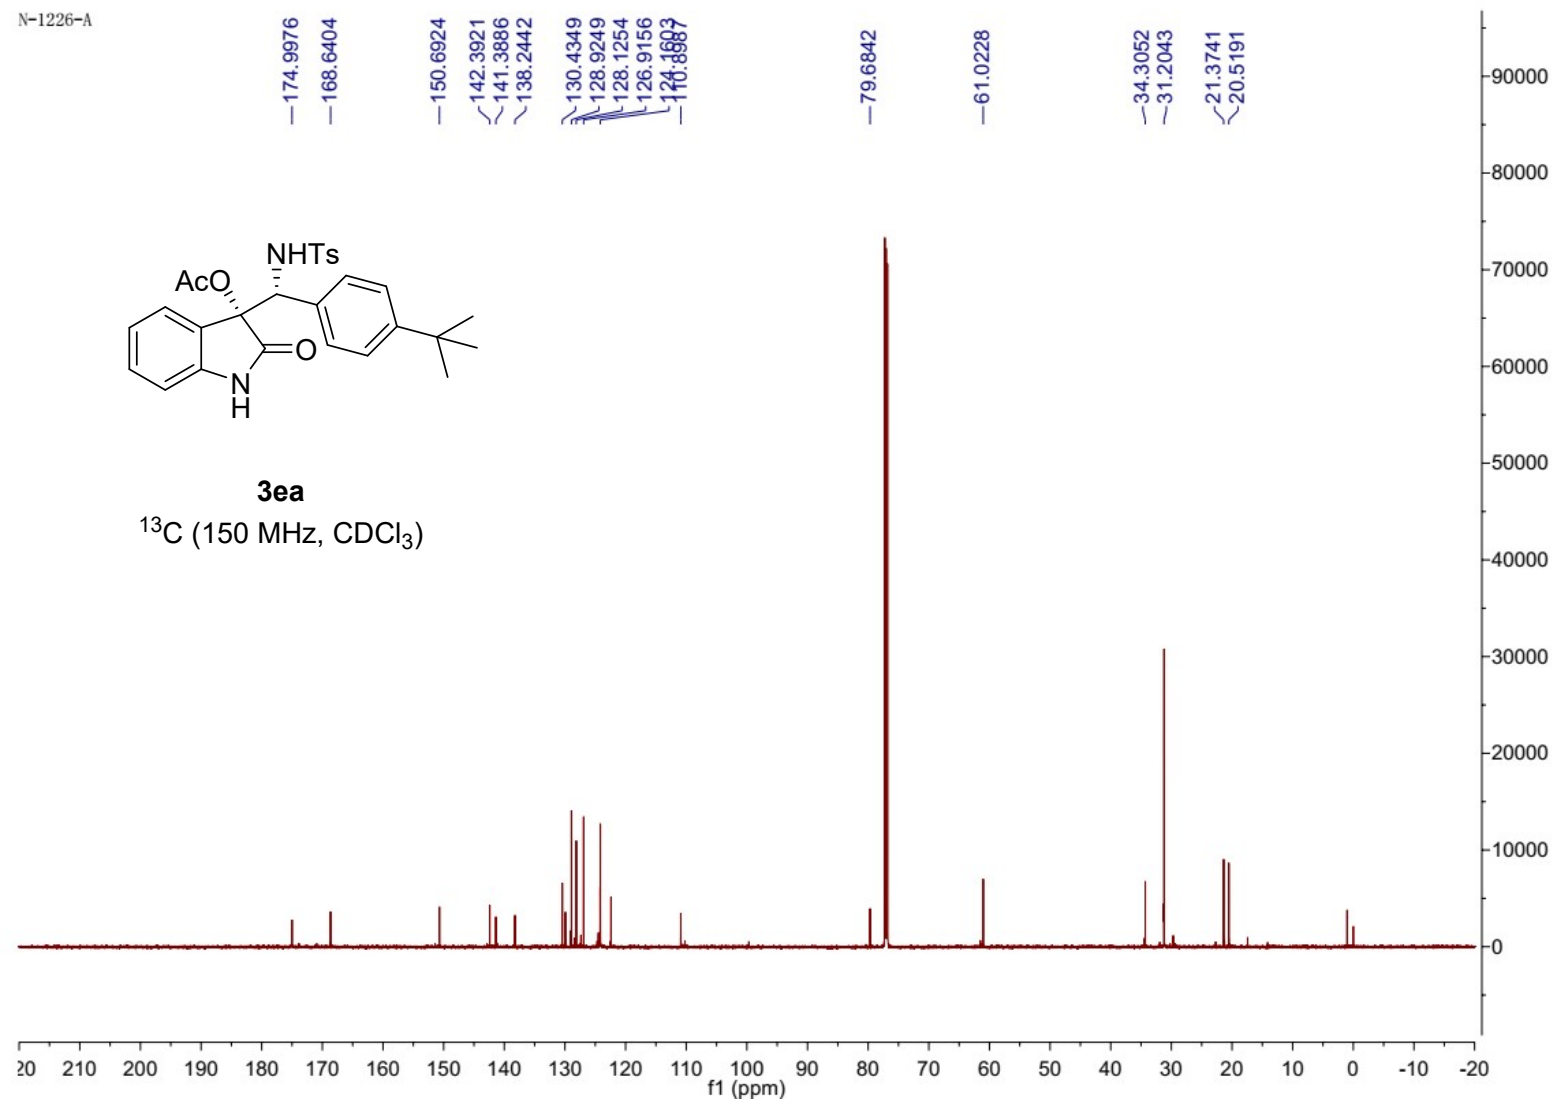

N35-B

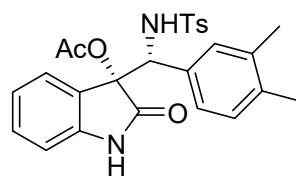

**3fa**

$^1\text{H}$  (600 MHz,  $\text{CDCl}_3$ )

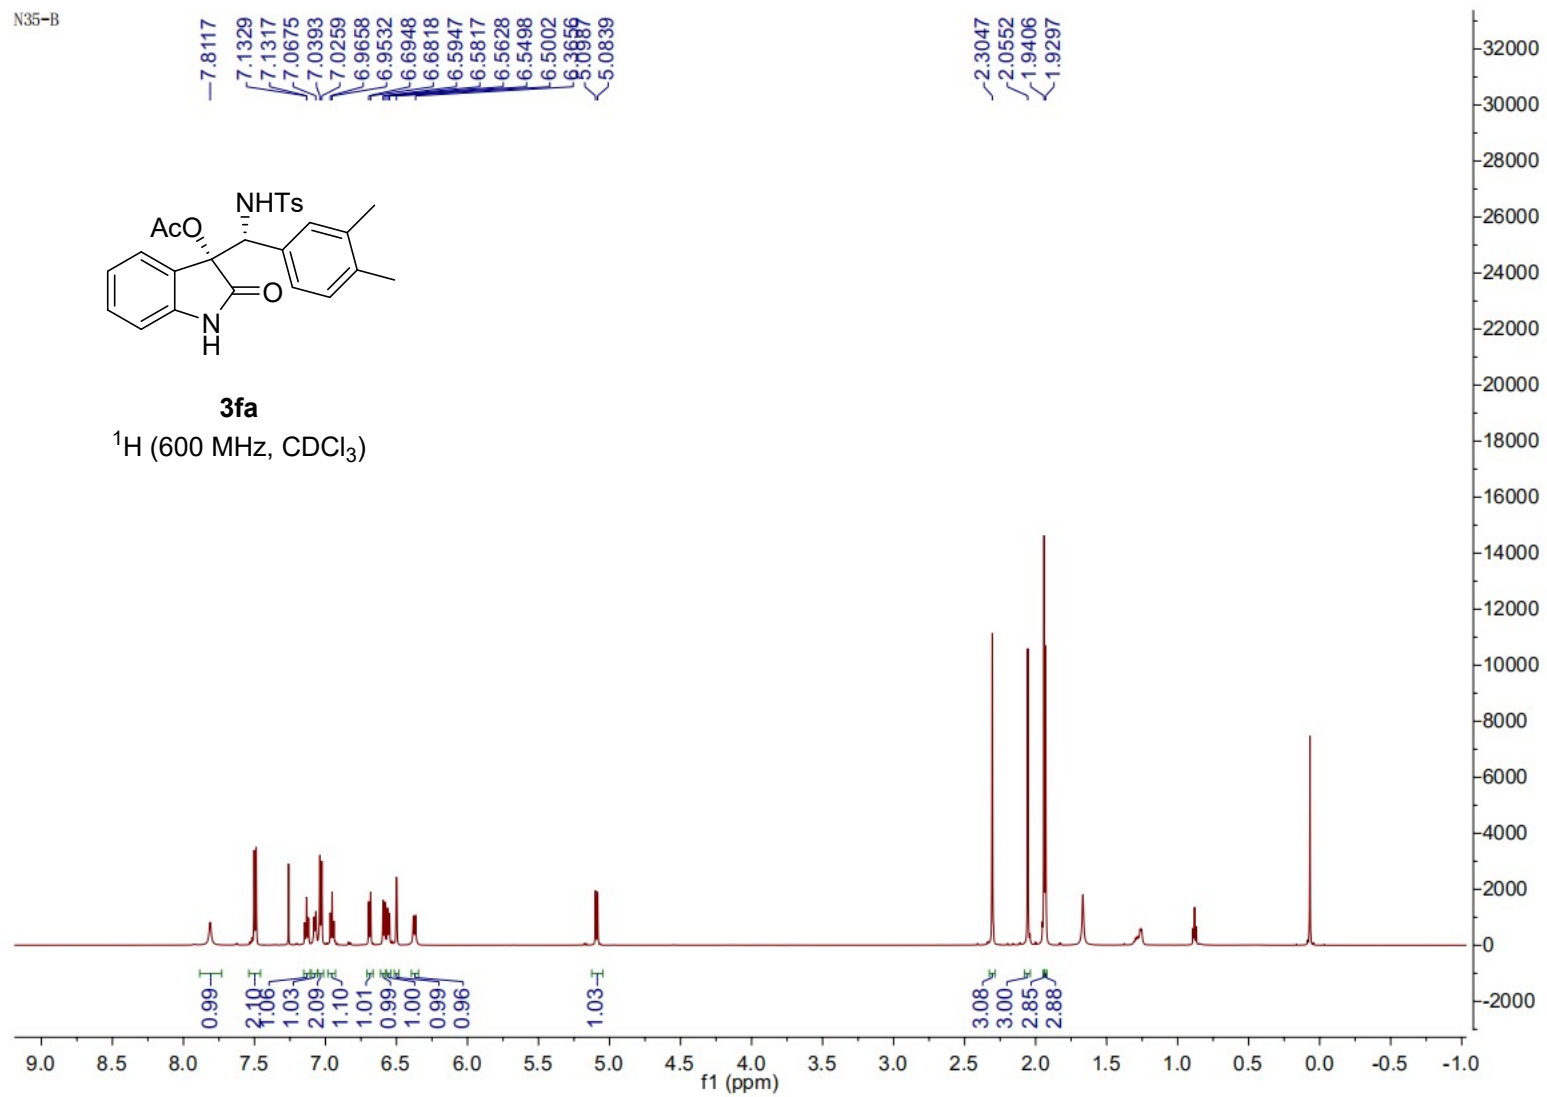

N35-B

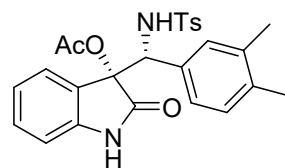

**3fa**

$^{13}\text{C}$  (150 MHz,  $\text{CDCl}_3$ )

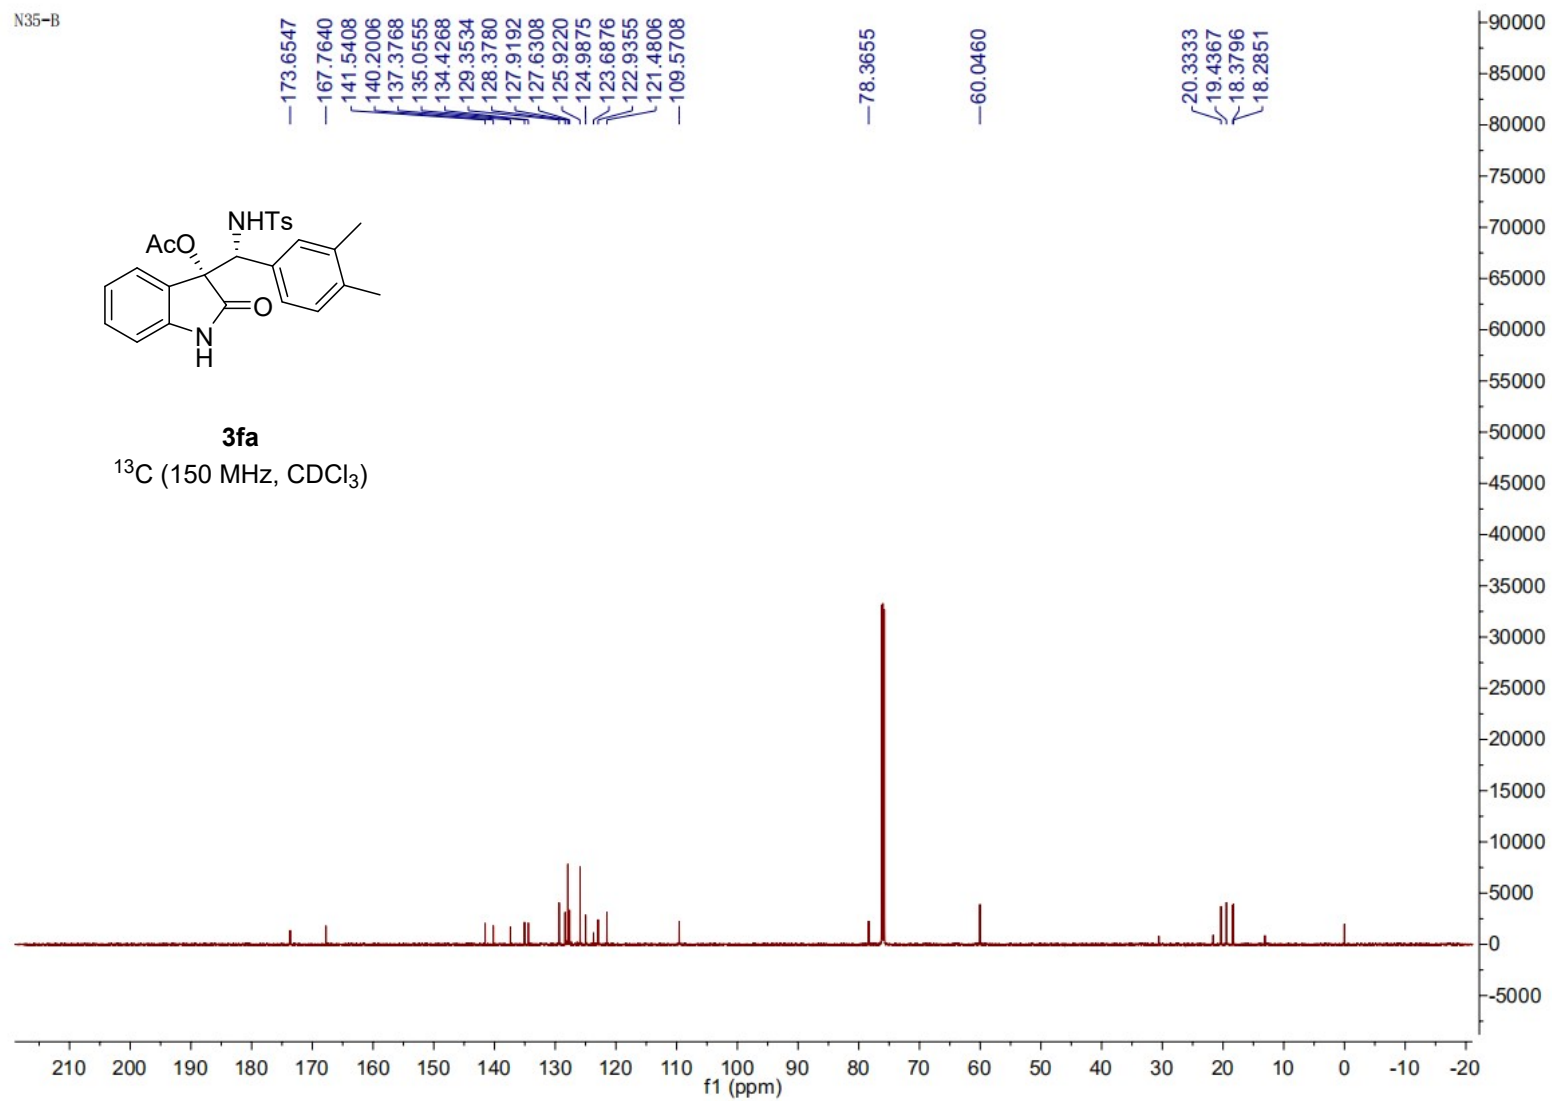

1226-B

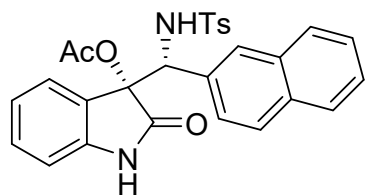

**3ga**

$^1\text{H}$  (600 MHz,  $\text{CDCl}_3$ )

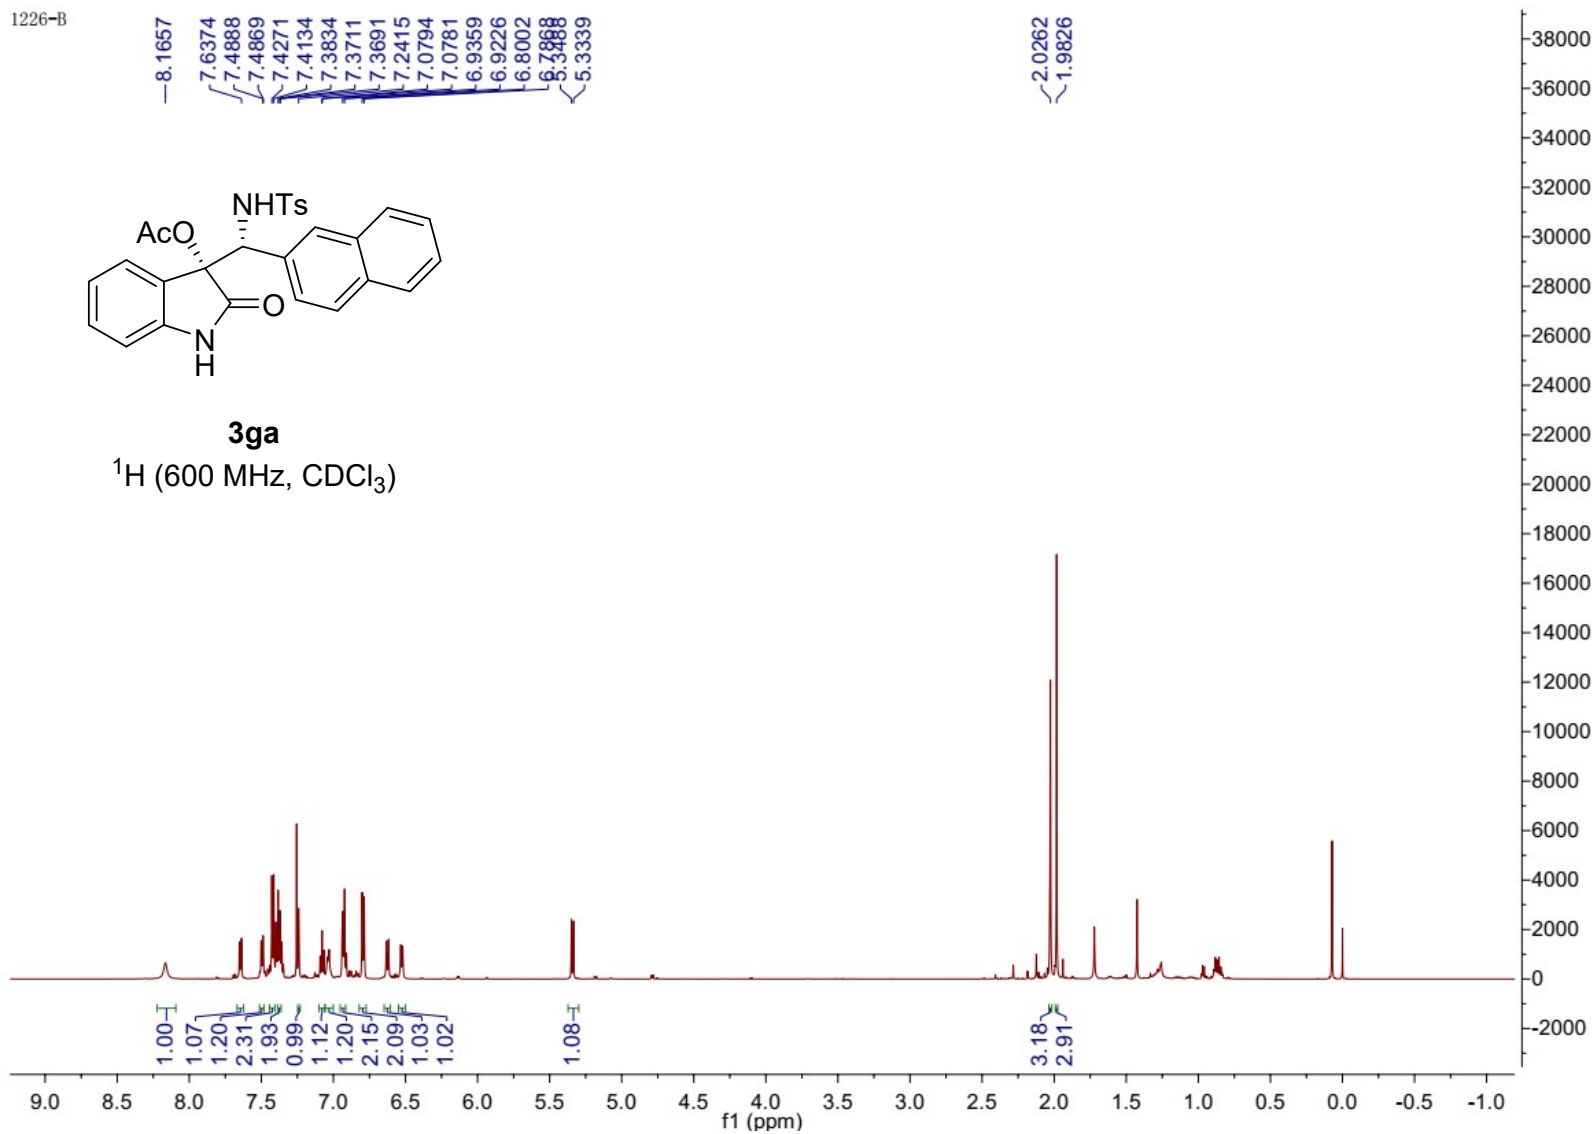



1226-B

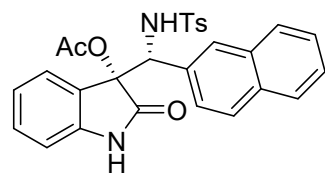

**3ga**  
 $^{13}\text{C}$  (150 MHz,  $\text{CDCl}_3$ )

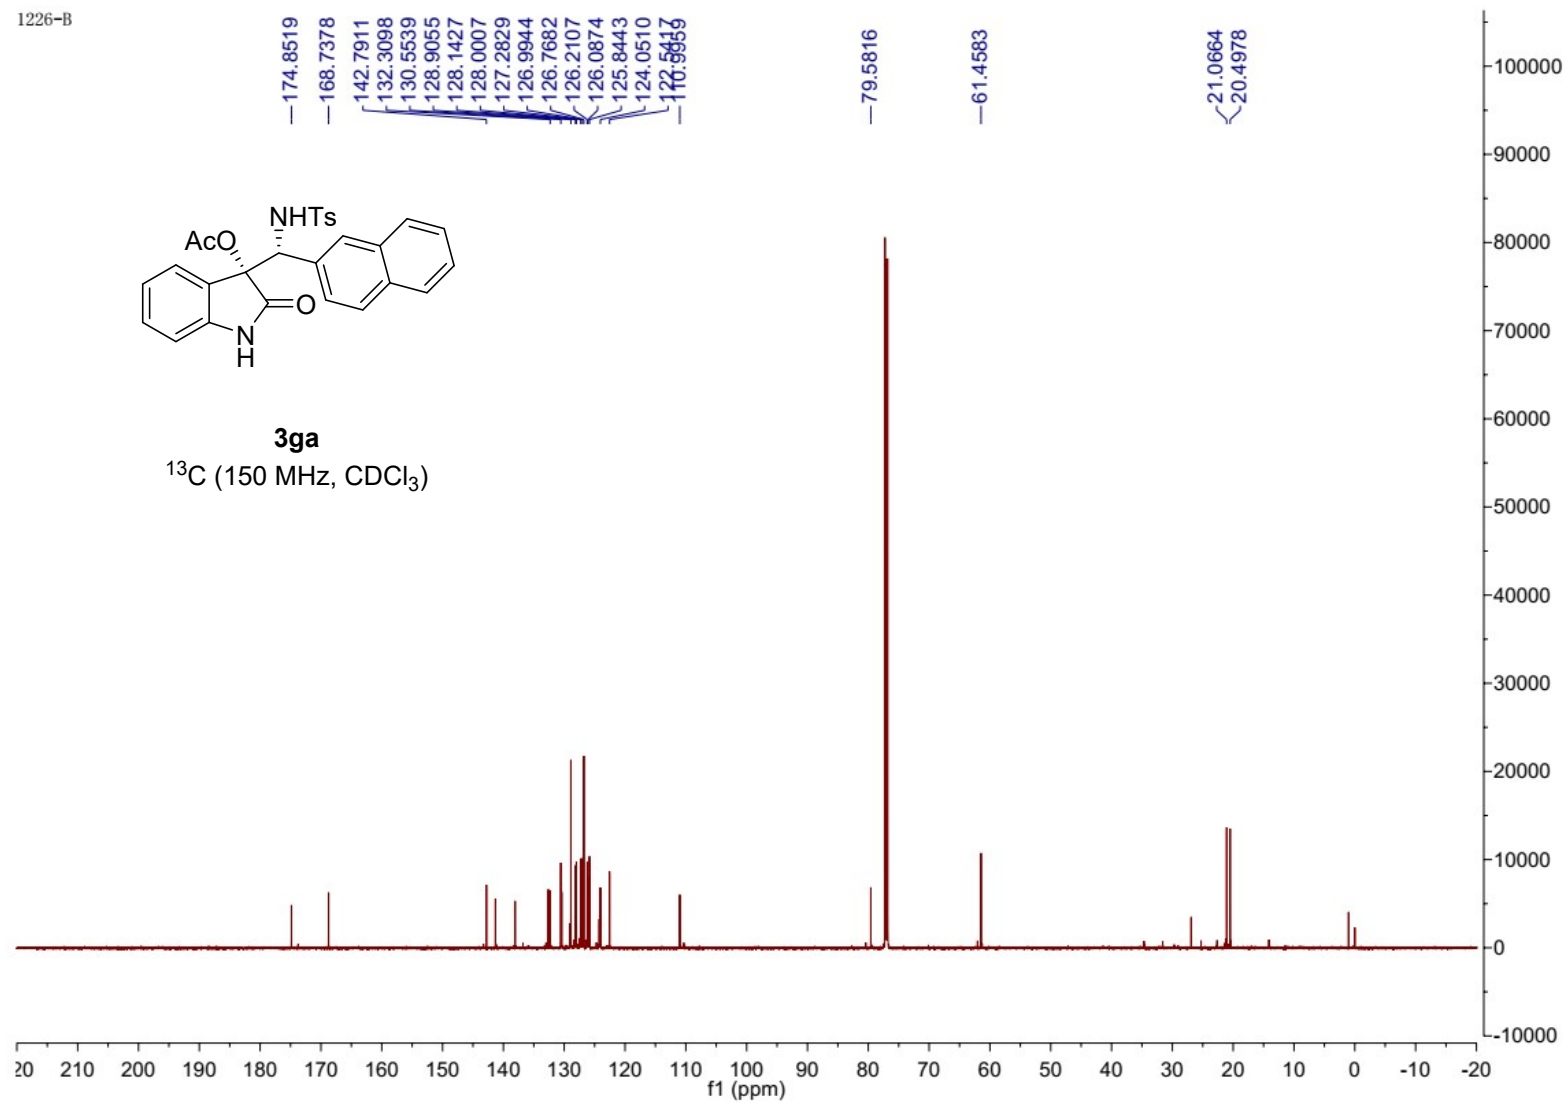

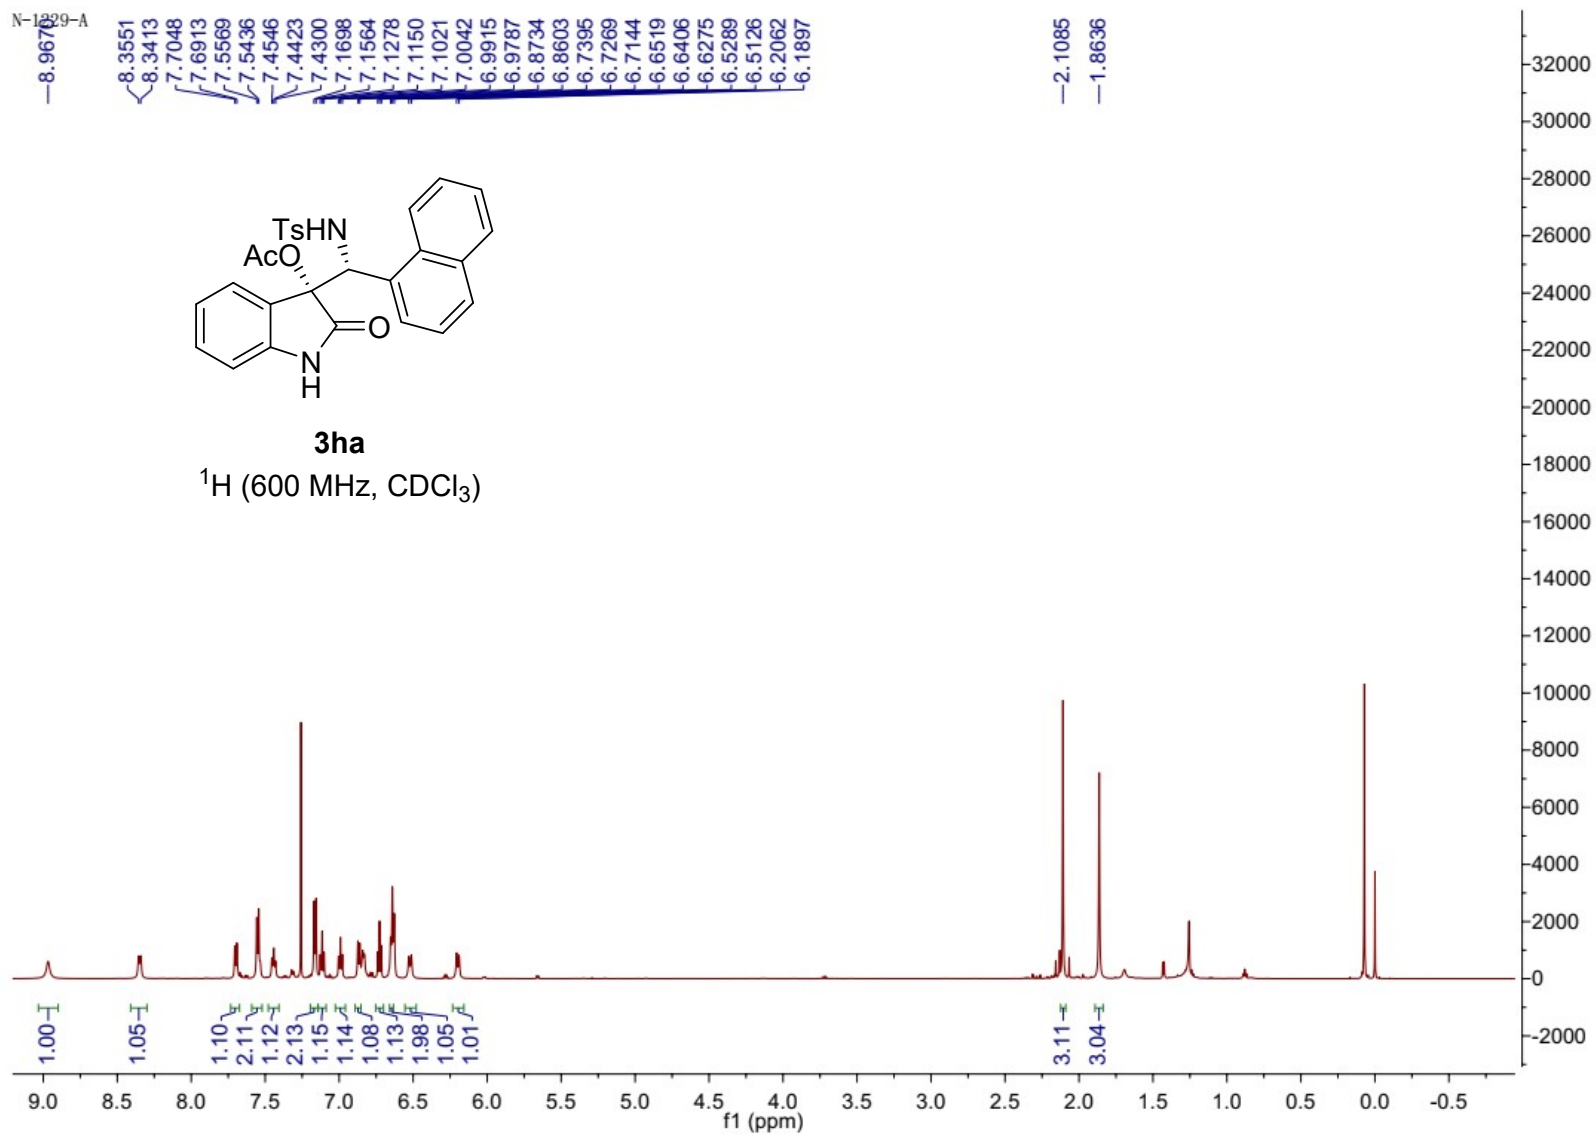

N-1229-A

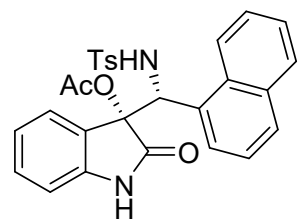

**3ha**

$^{13}\text{C}$  (150 MHz,  $\text{CDCl}_3$ )

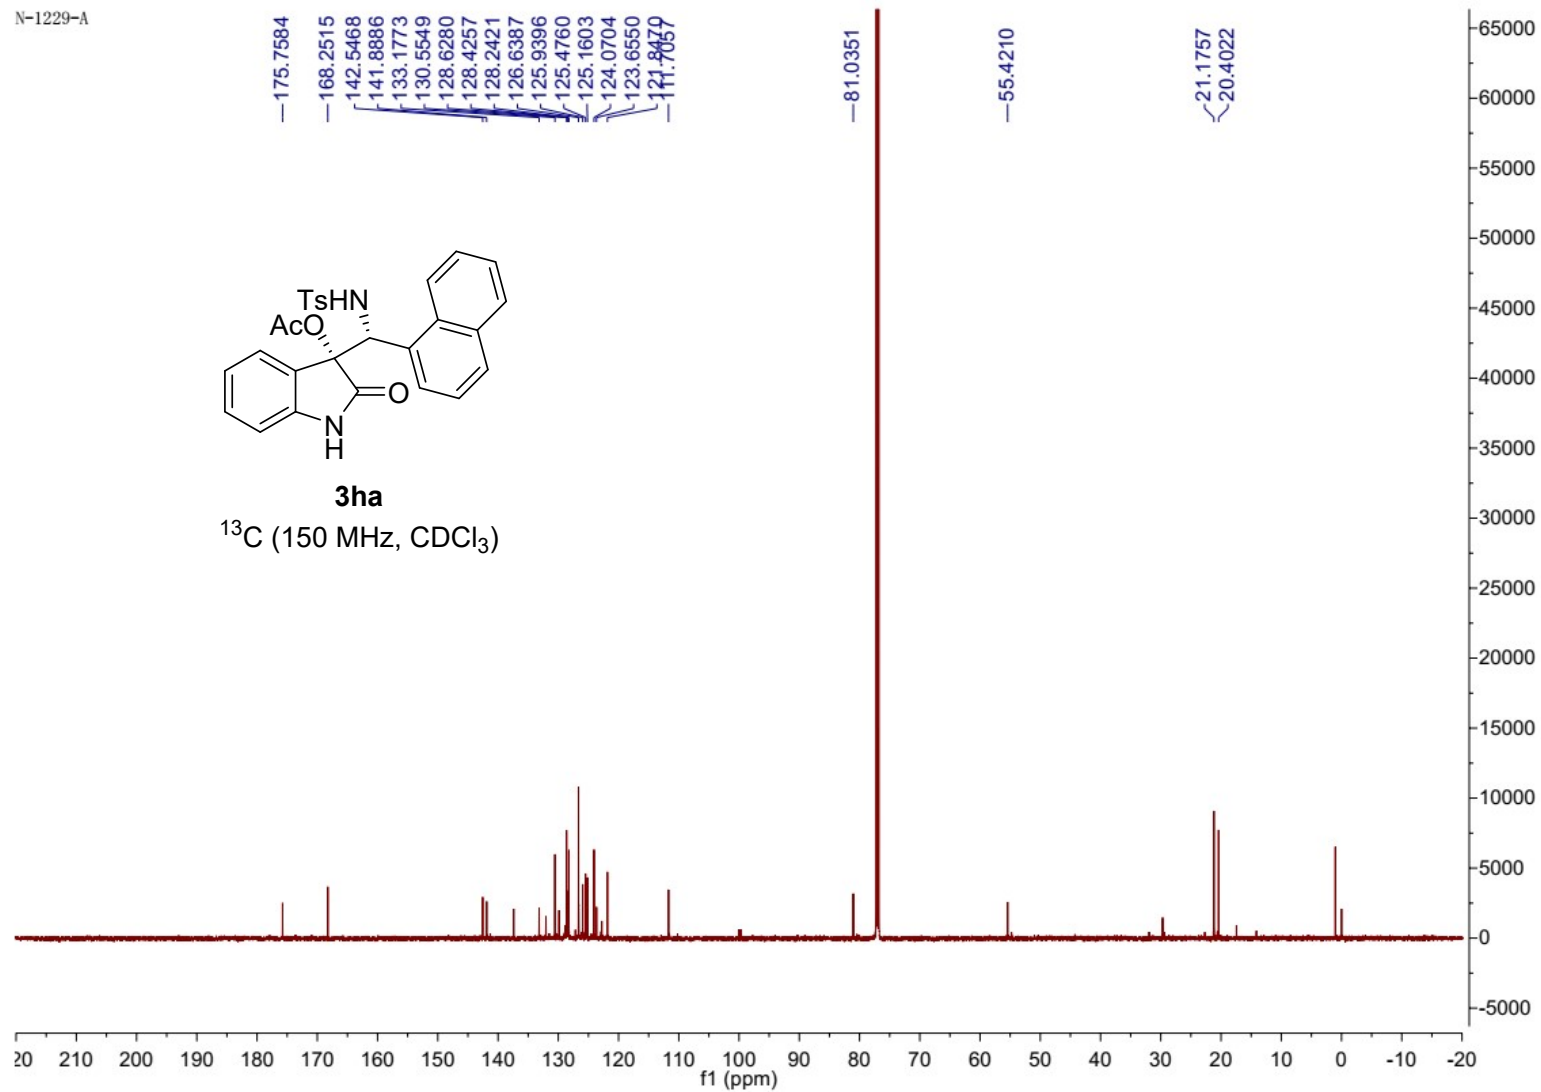

1226-D

8.2921  
7.6873  
7.5560  
7.5424  
7.2927  
7.2800  
7.1982  
7.1849  
7.1391  
7.0822  
7.0688  
6.9919  
6.9793  
6.7645  
6.7506  
6.6031  
5.5907  
5.2203

2.2921  
1.9620

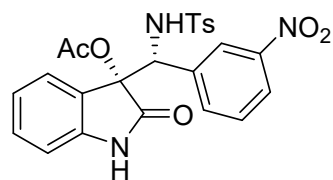

**3ia**

<sup>1</sup>H (600 MHz, CDCl<sub>3</sub>)

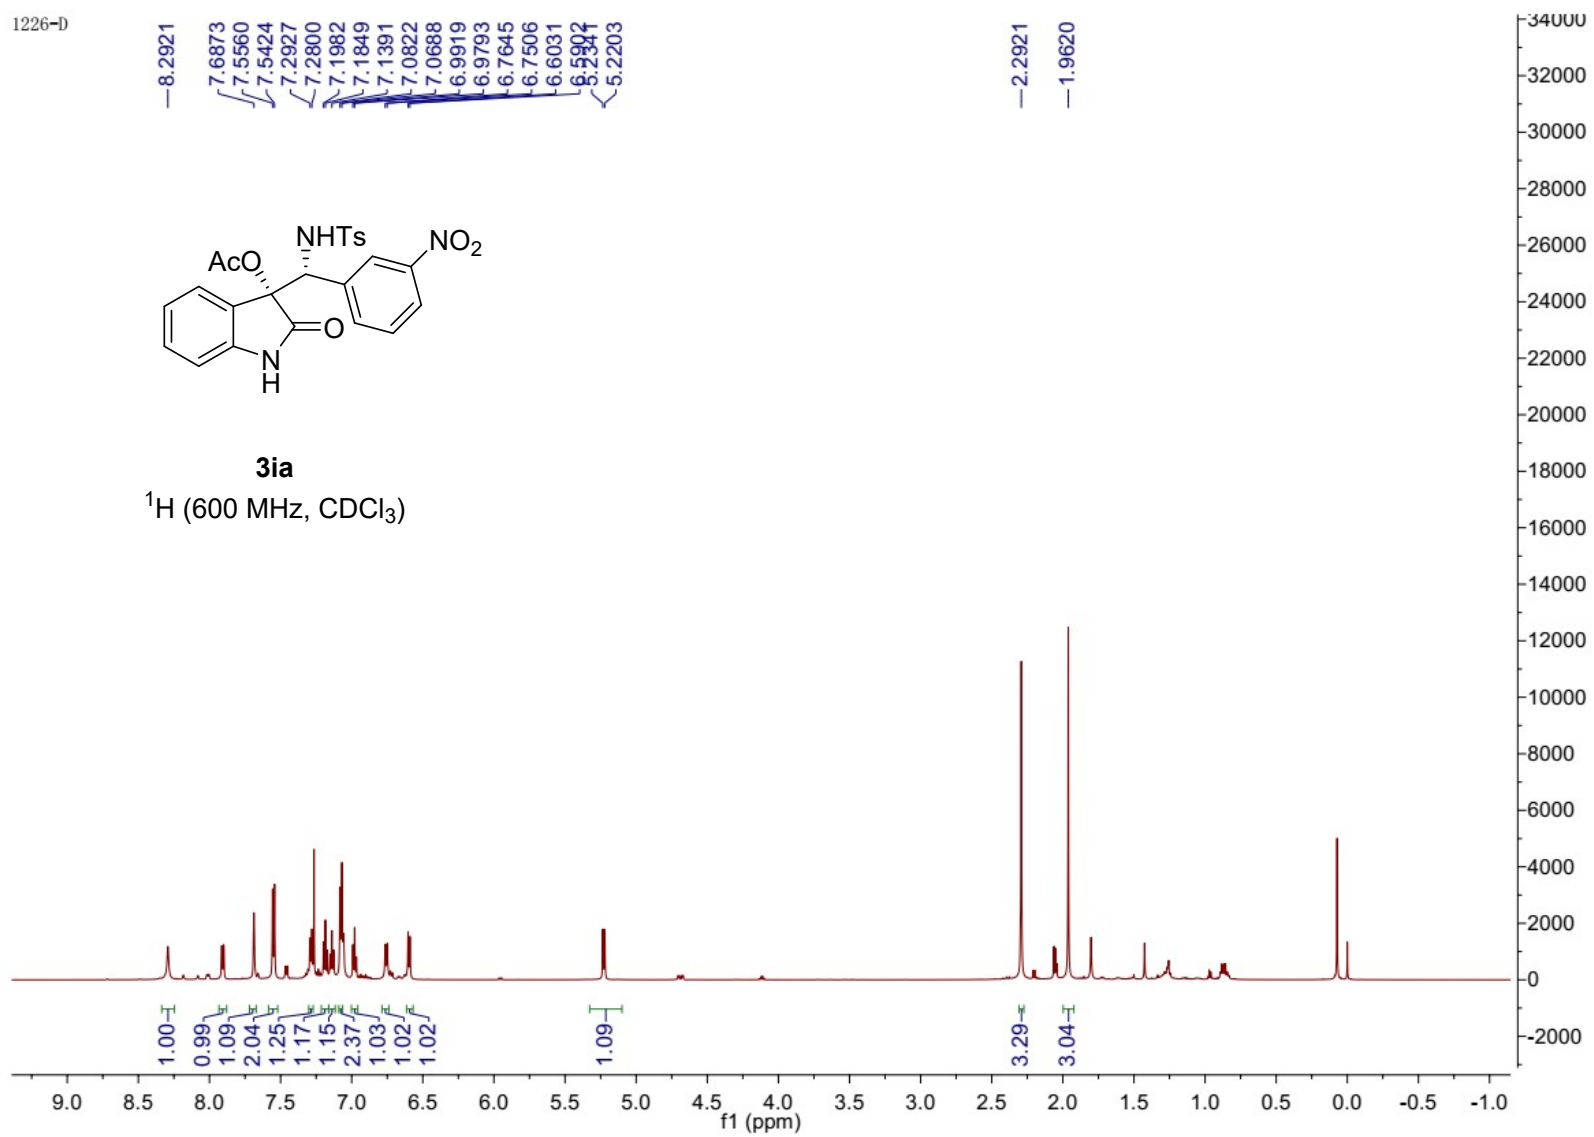

1226-D

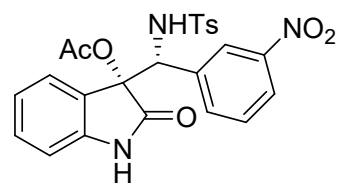

**3ia**

<sup>13</sup>C (150 MHz, CDCl<sub>3</sub>)

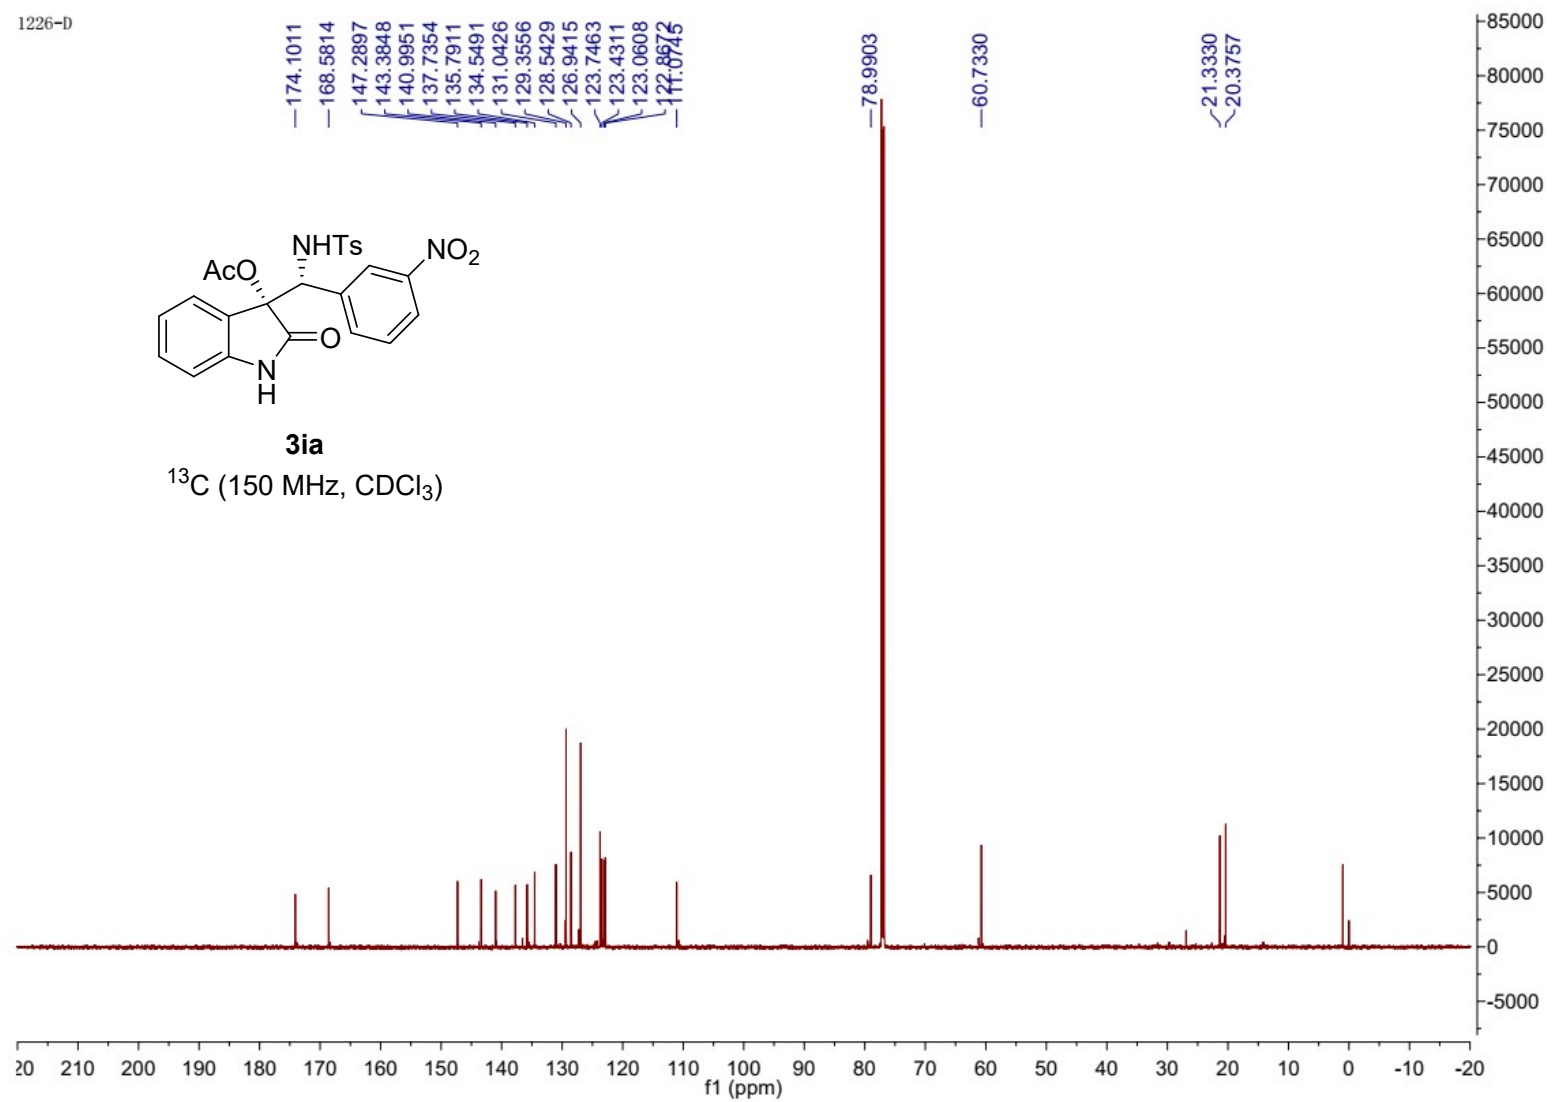

1226-C

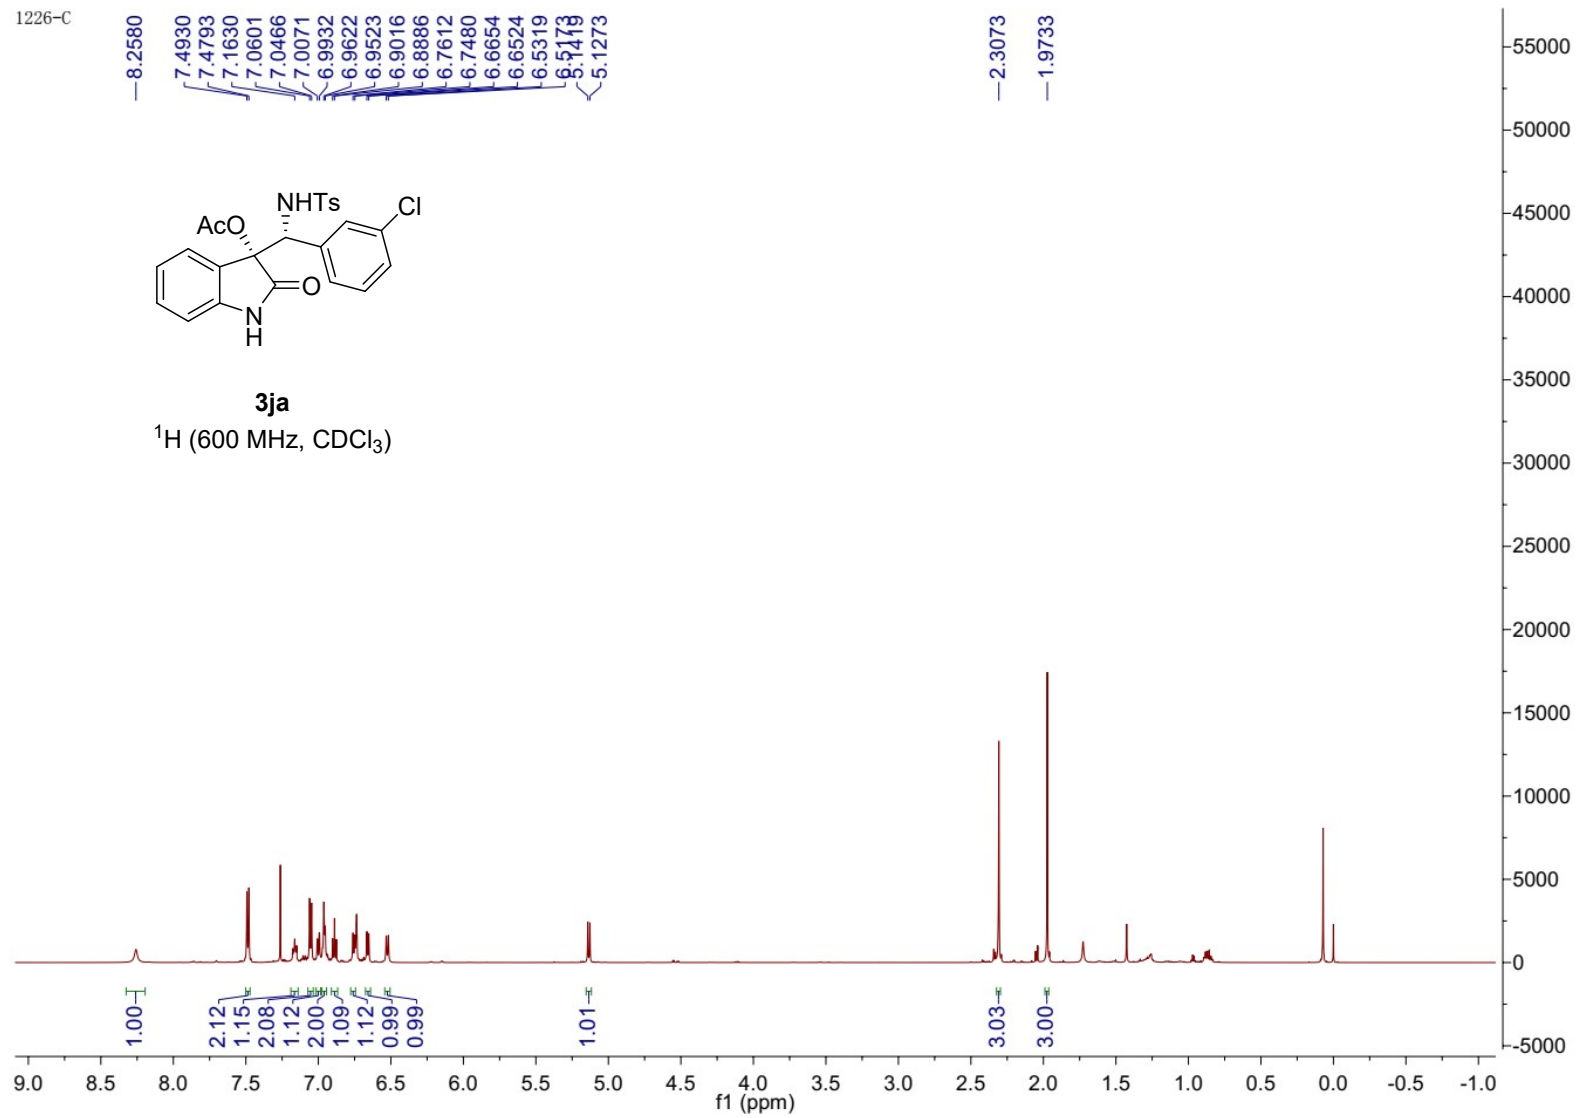

1226-C

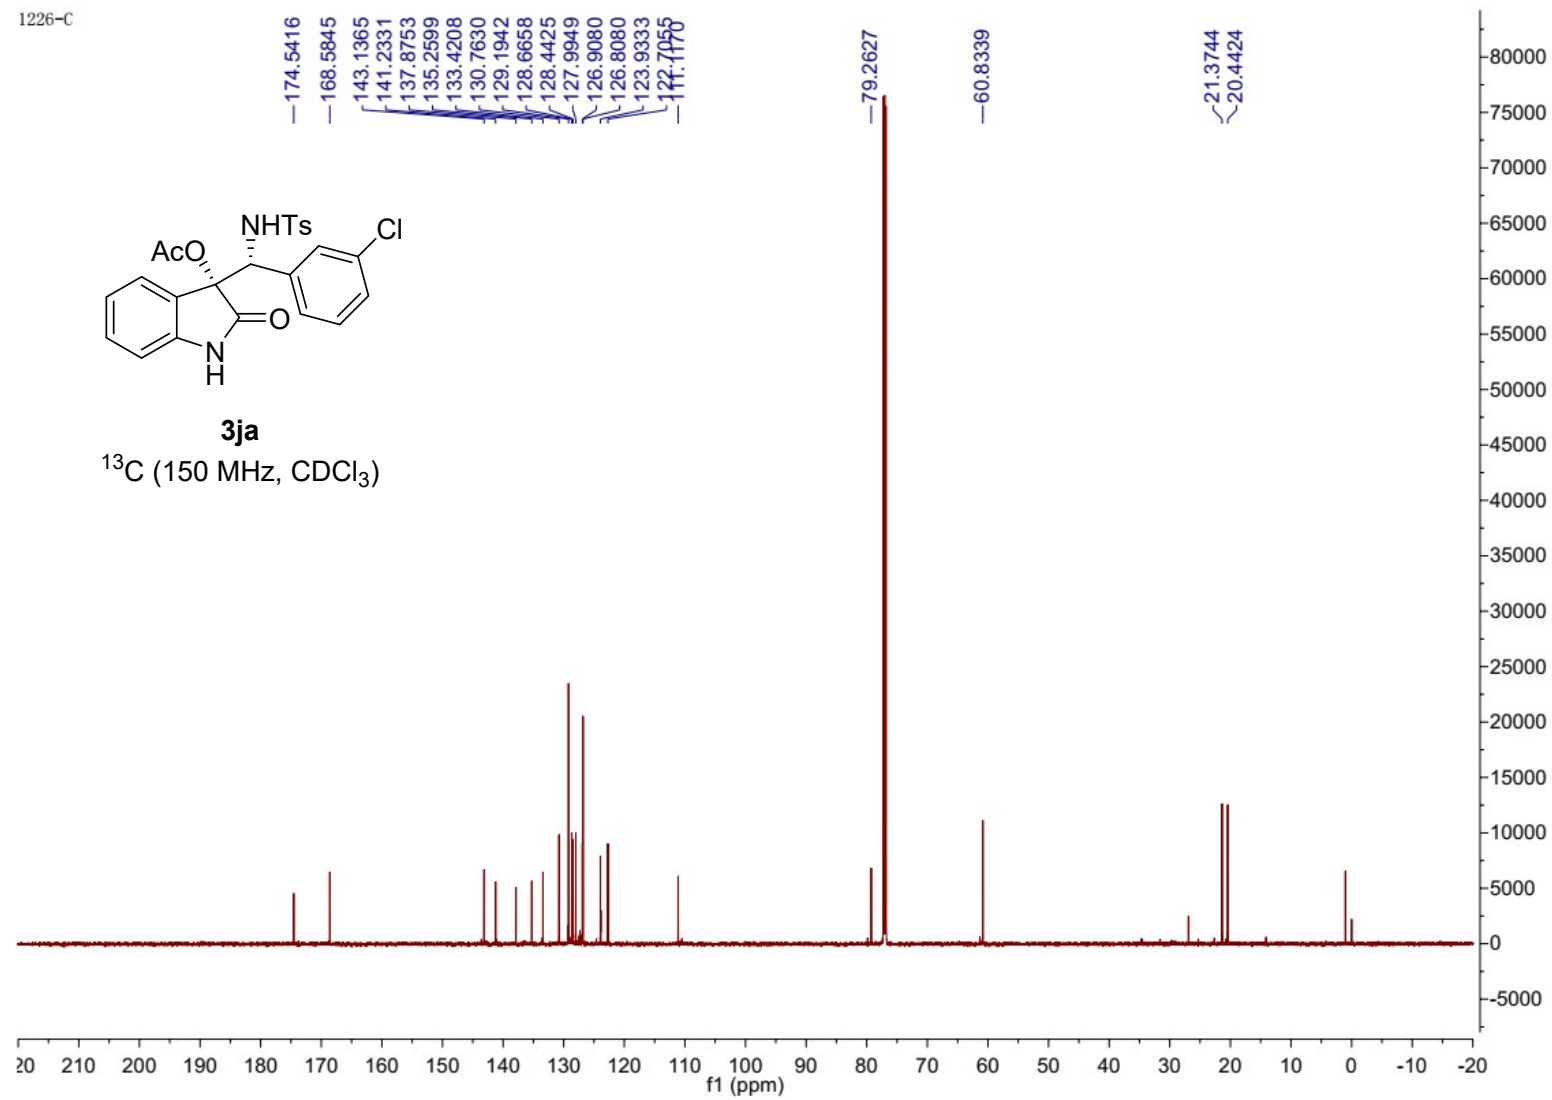

N-0308-D

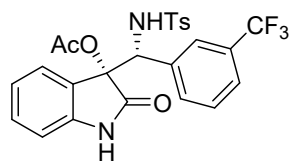

**3ka**

<sup>1</sup>H (600 MHz, CDCl<sub>3</sub>)

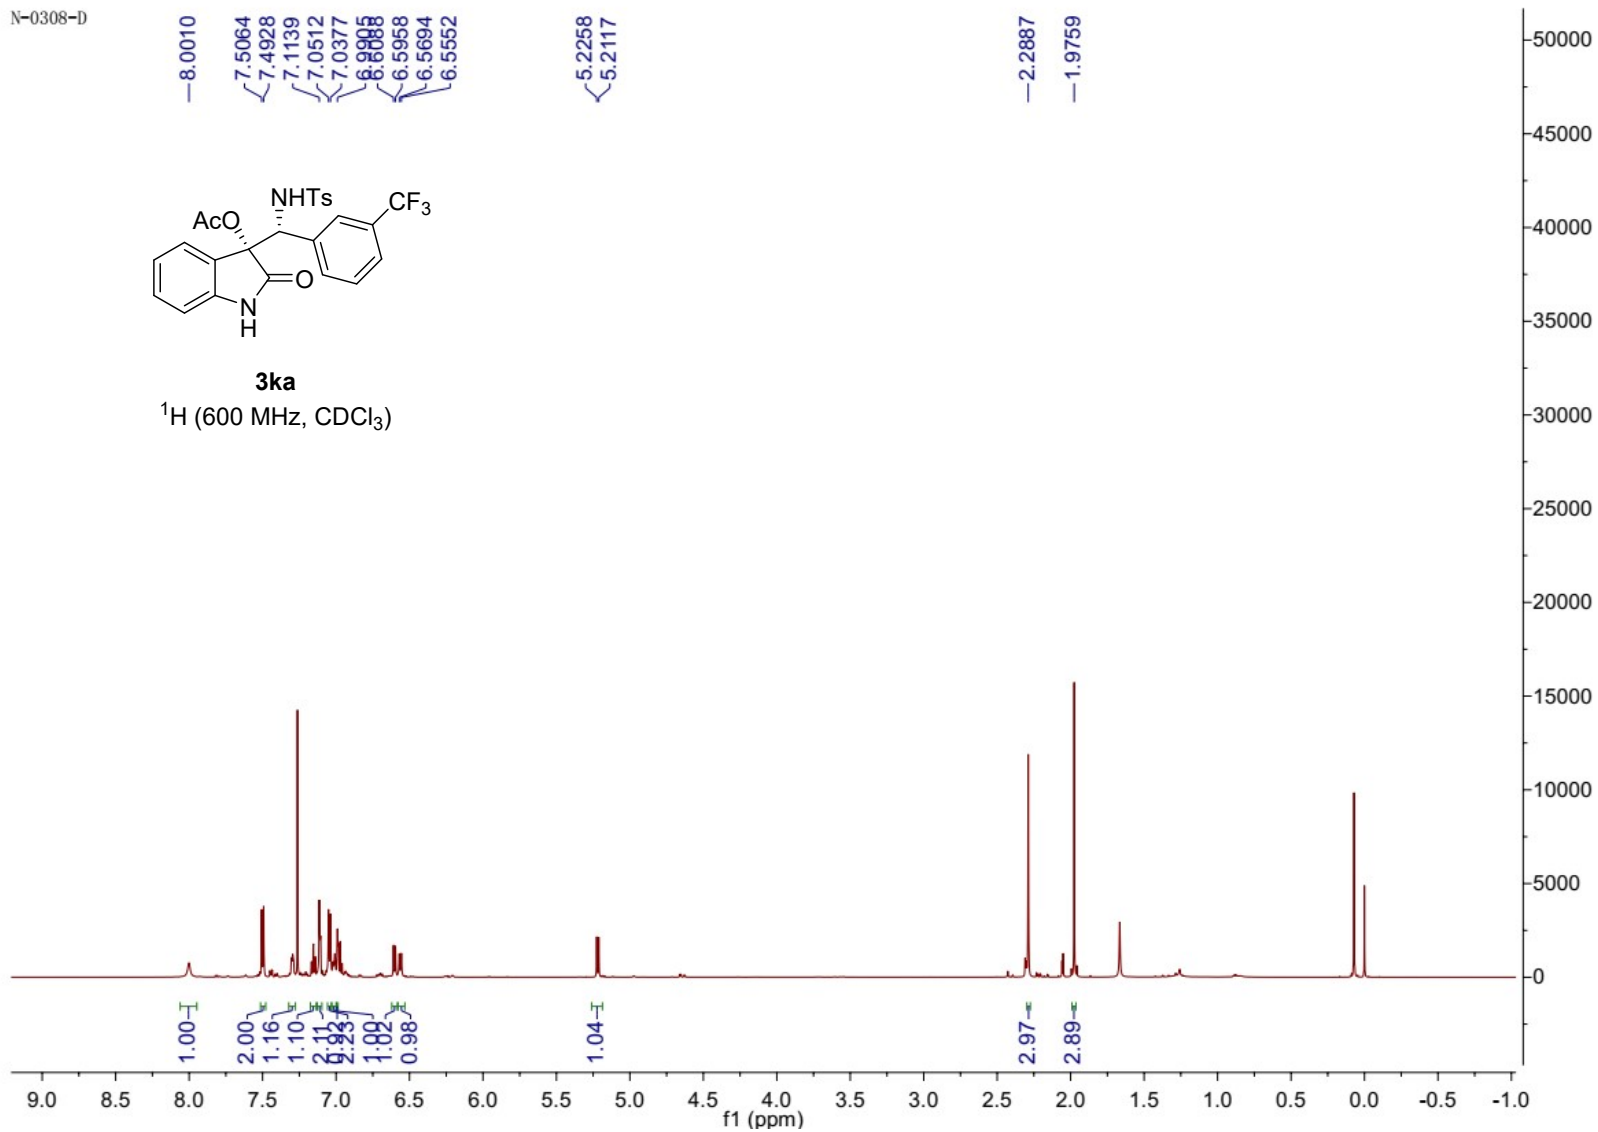



N-0308-D

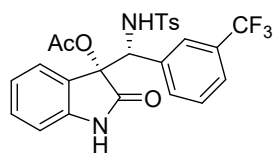

**3ka**

<sup>13</sup>C (150 MHz, CDCl<sub>3</sub>)

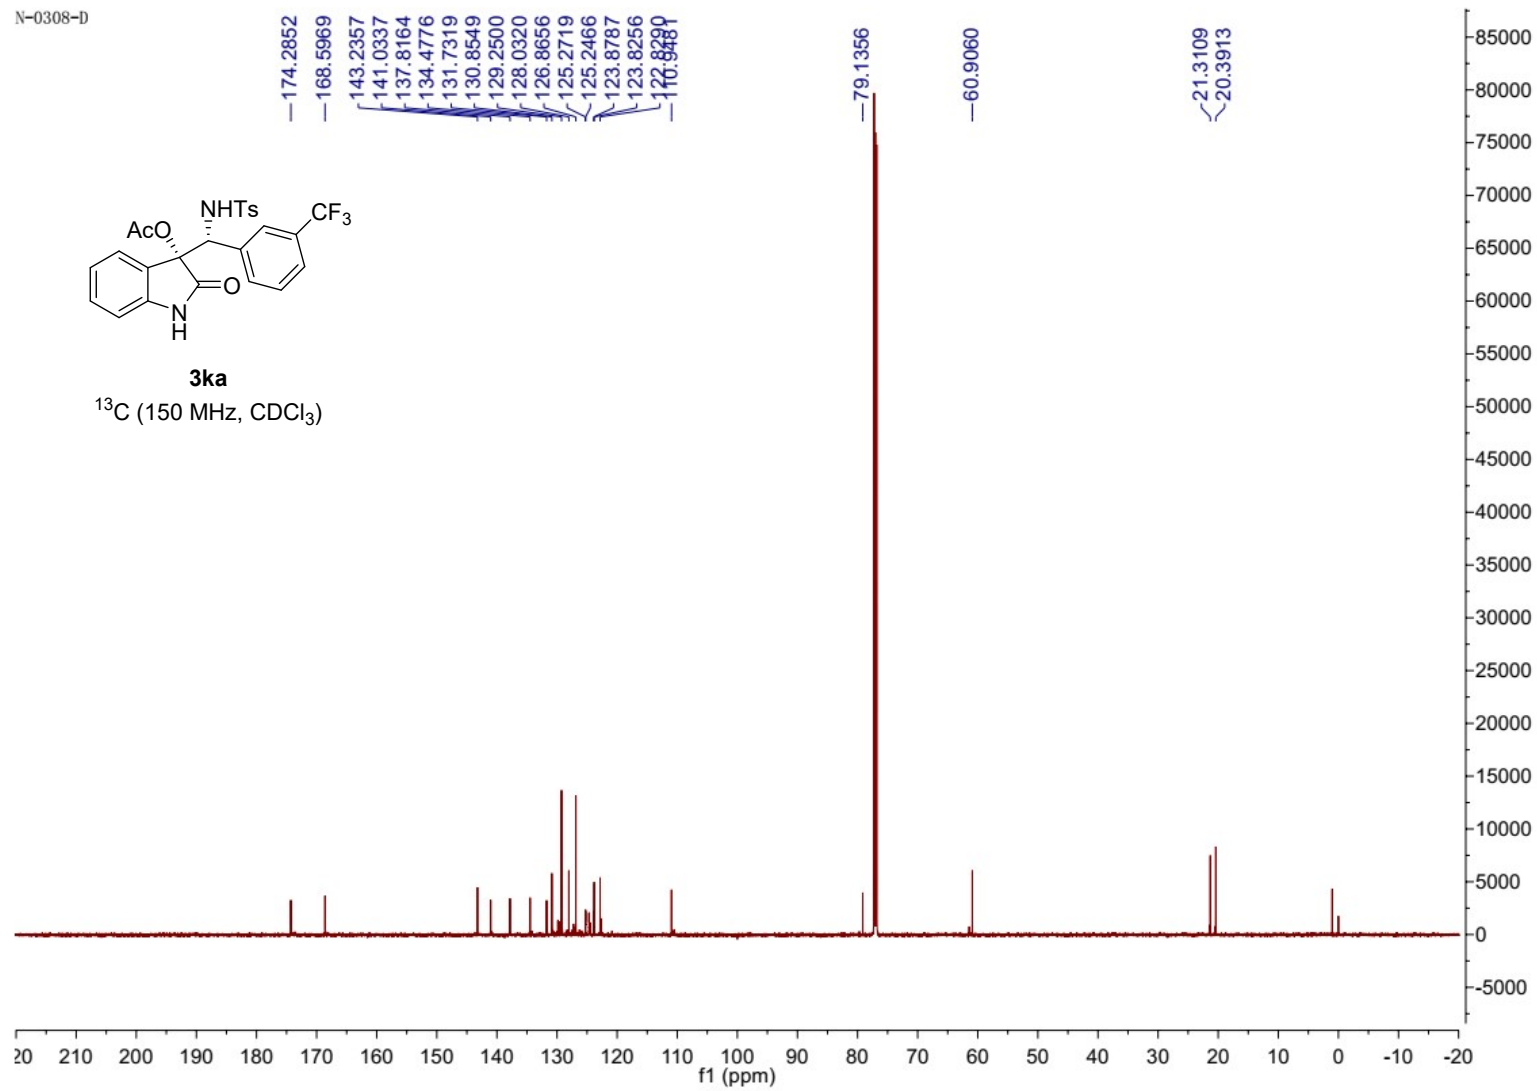

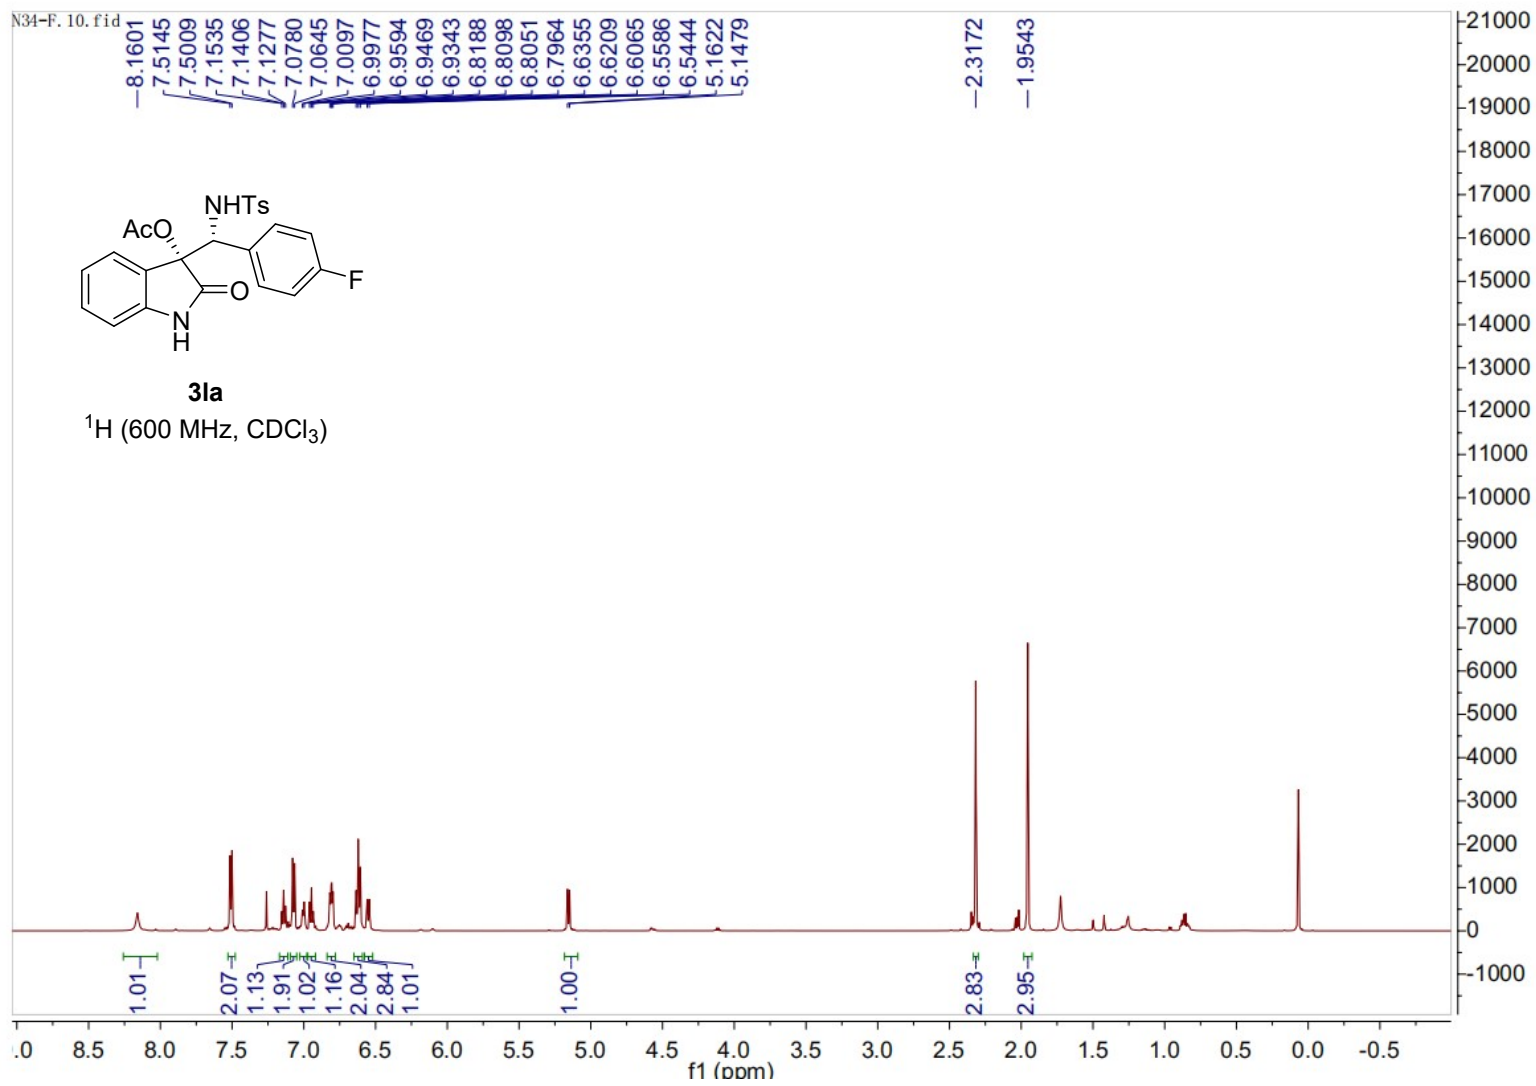

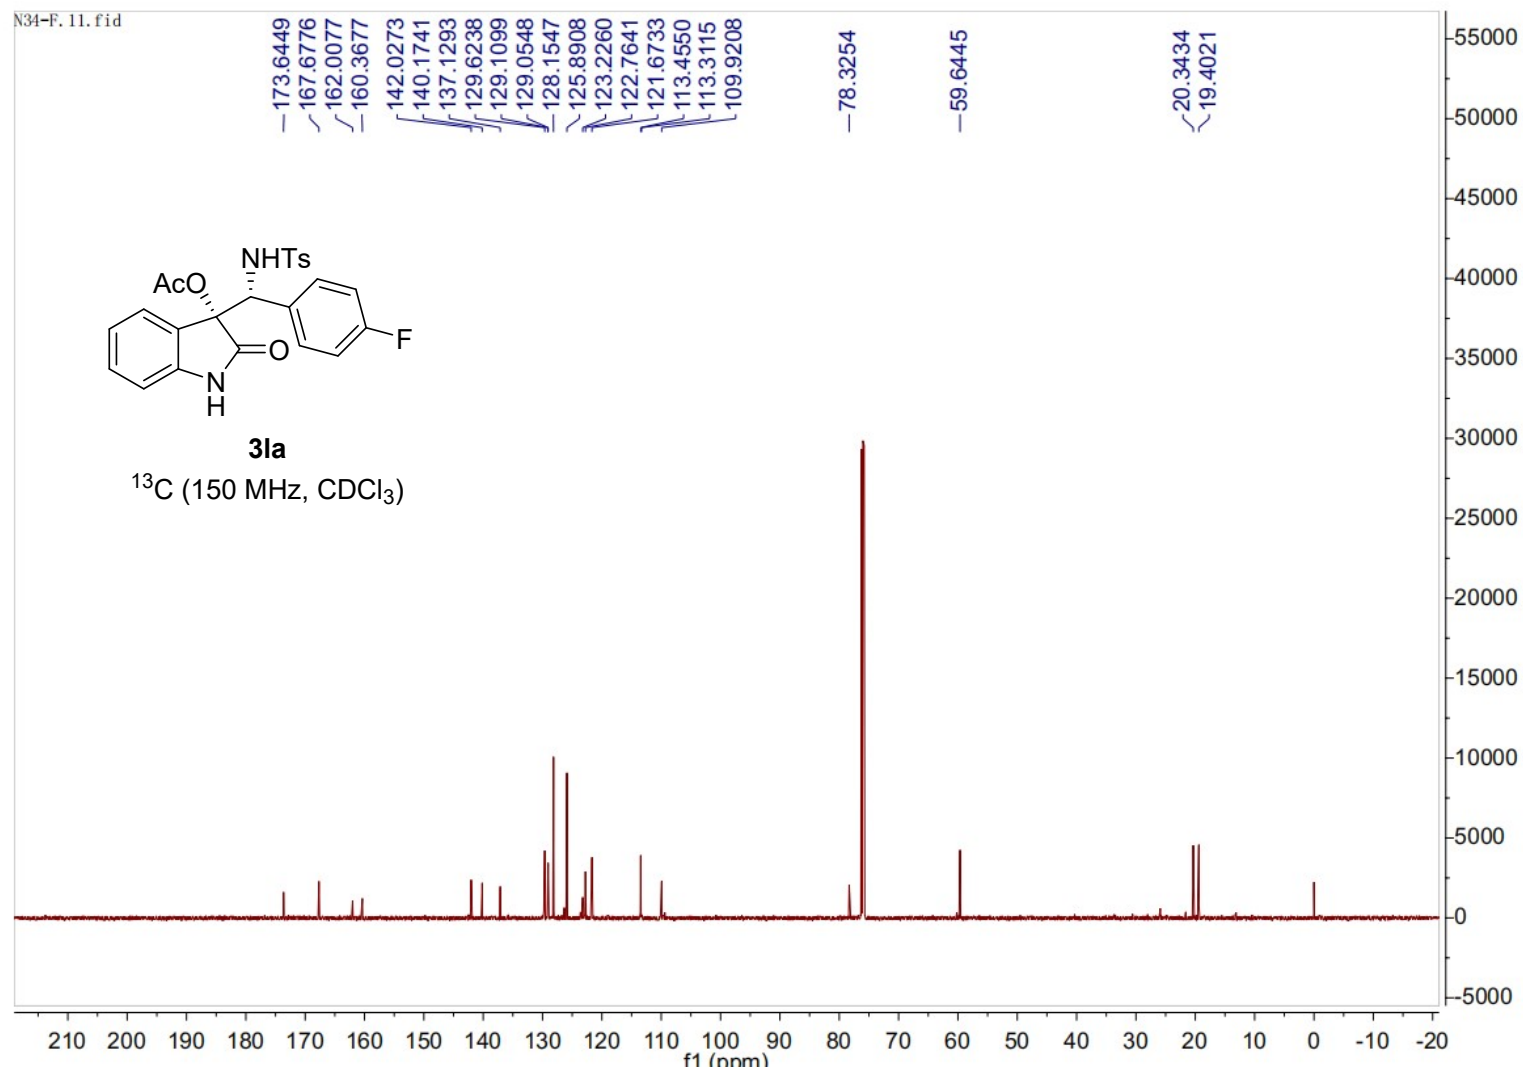

N-1225-D

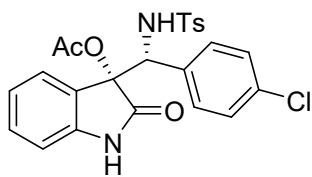

**3ma**

$^1\text{H}$  (600 MHz,  $\text{CDCl}_3$ )

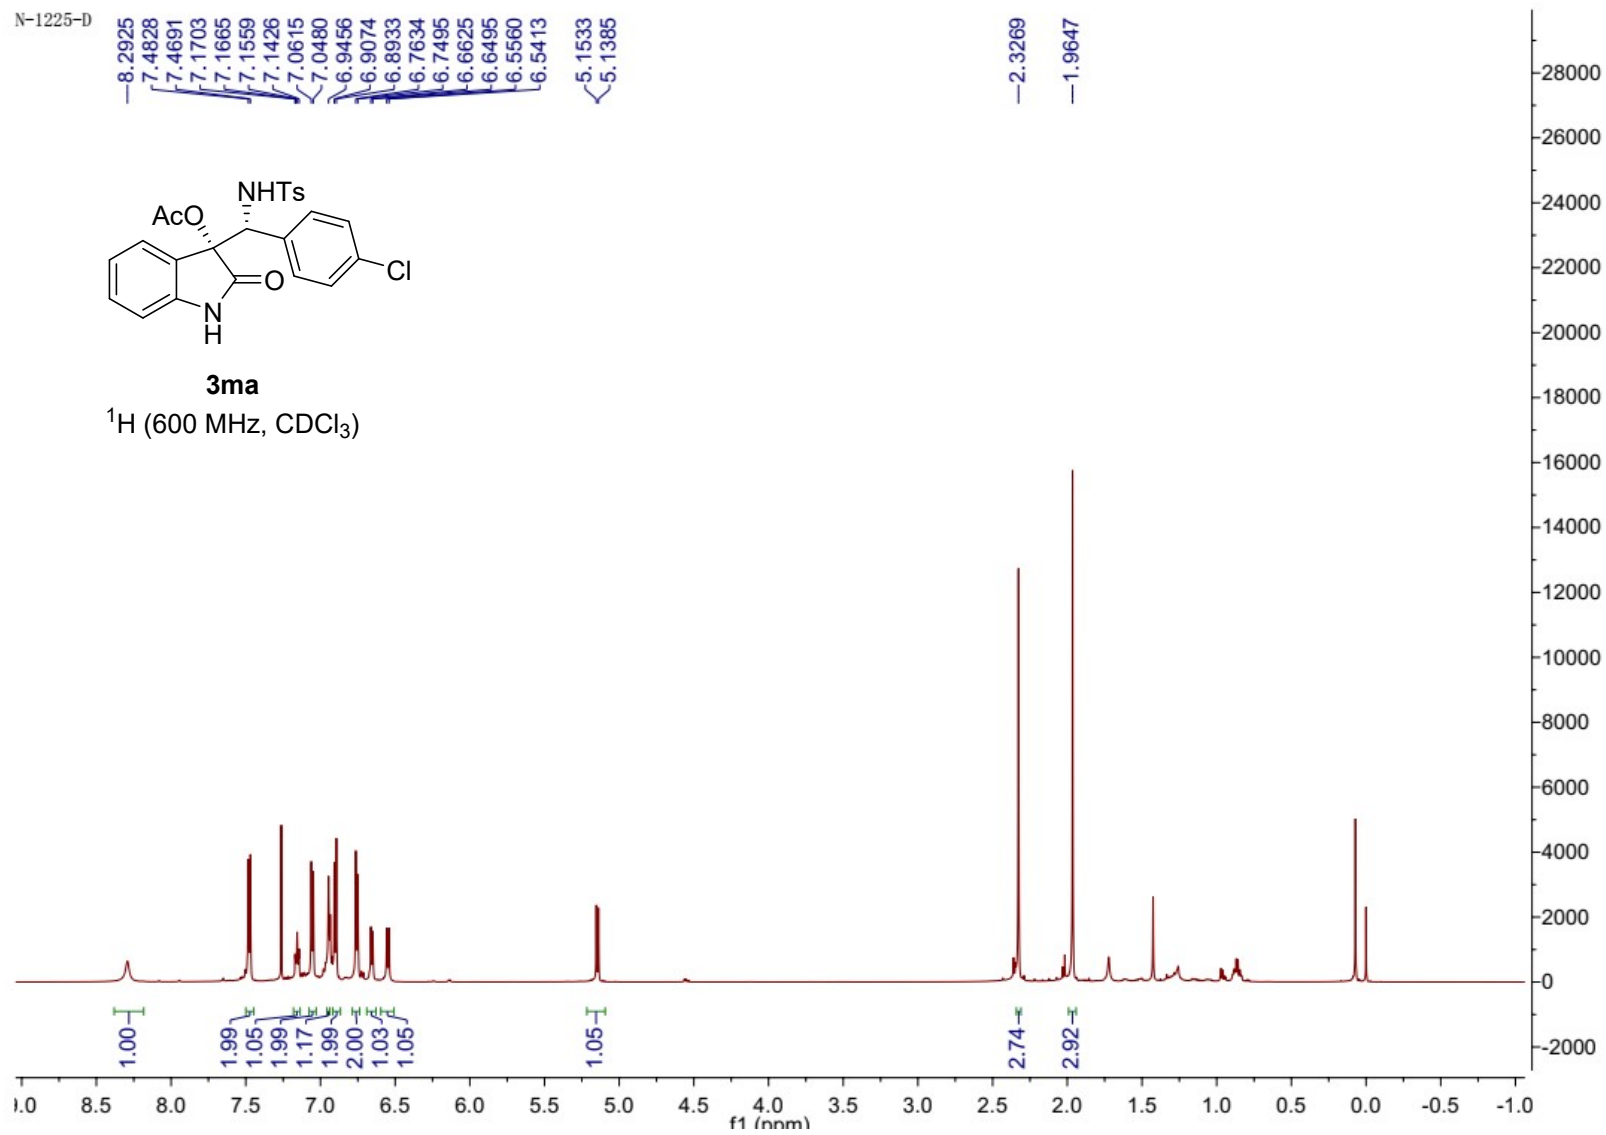

N-1225-D

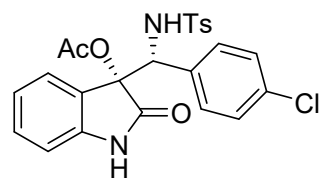

**3ma**

$^{13}\text{C}$  (150 MHz,  $\text{CDCl}_3$ )

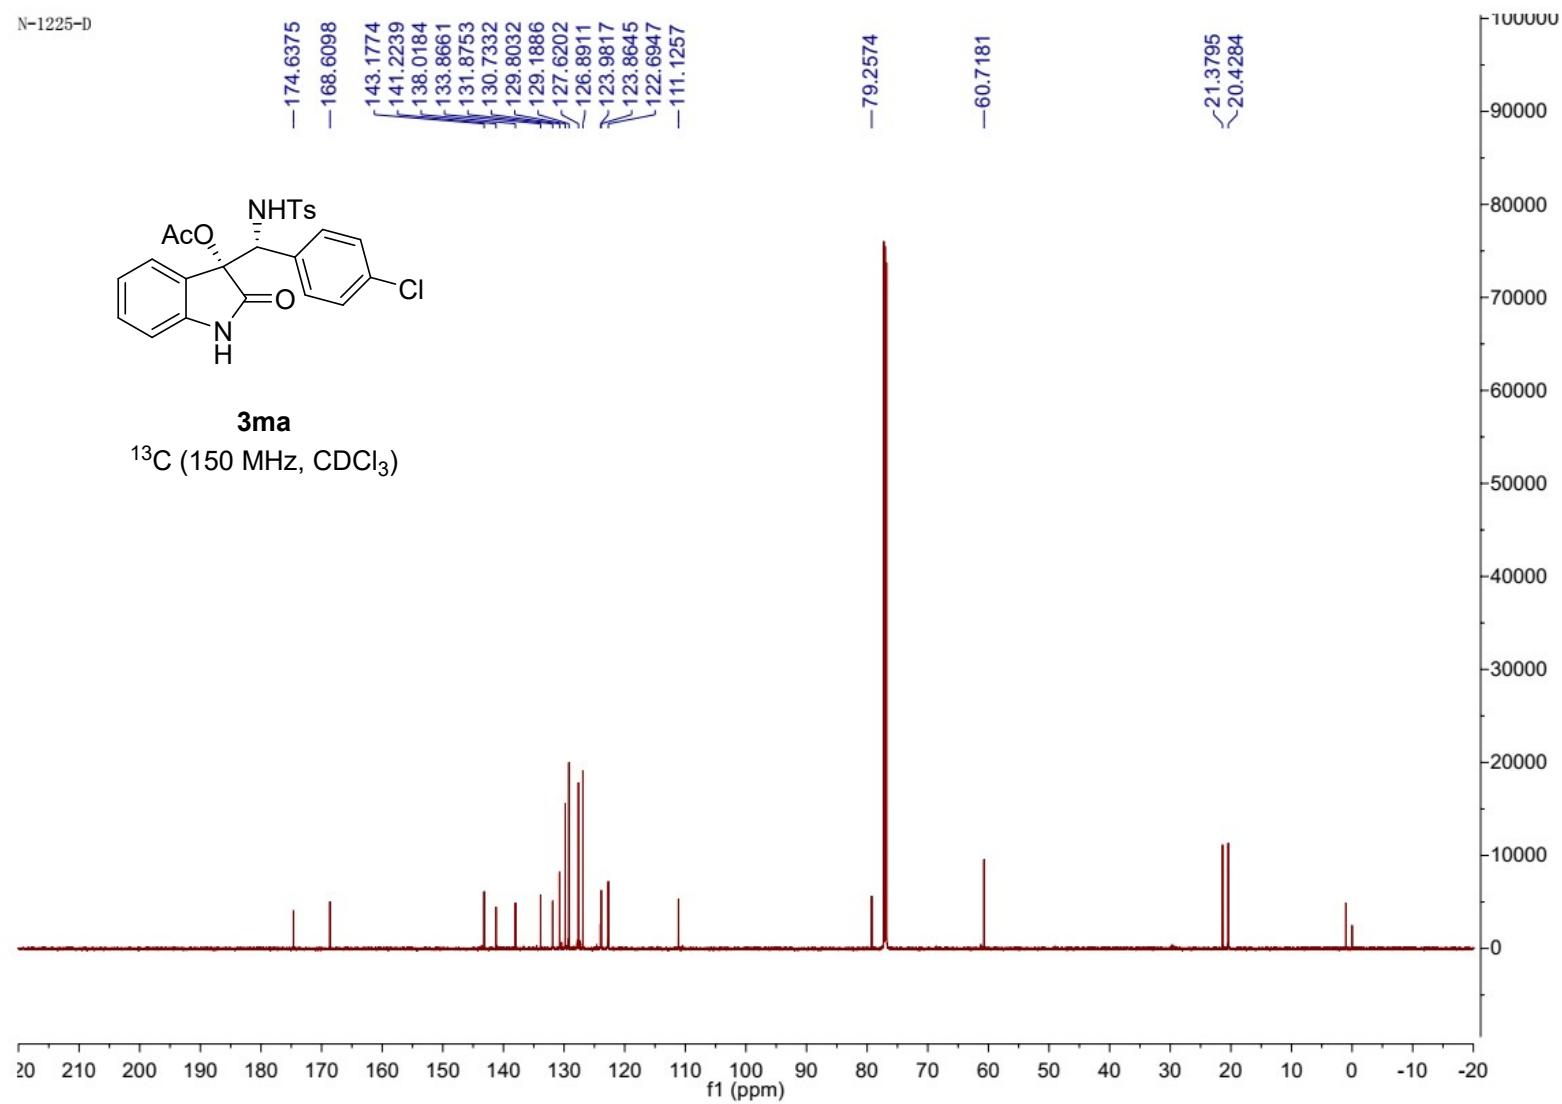

N-1219-B

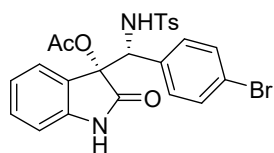

**3na**

$^1\text{H}$  (600 MHz,  $\text{CDCl}_3$ )

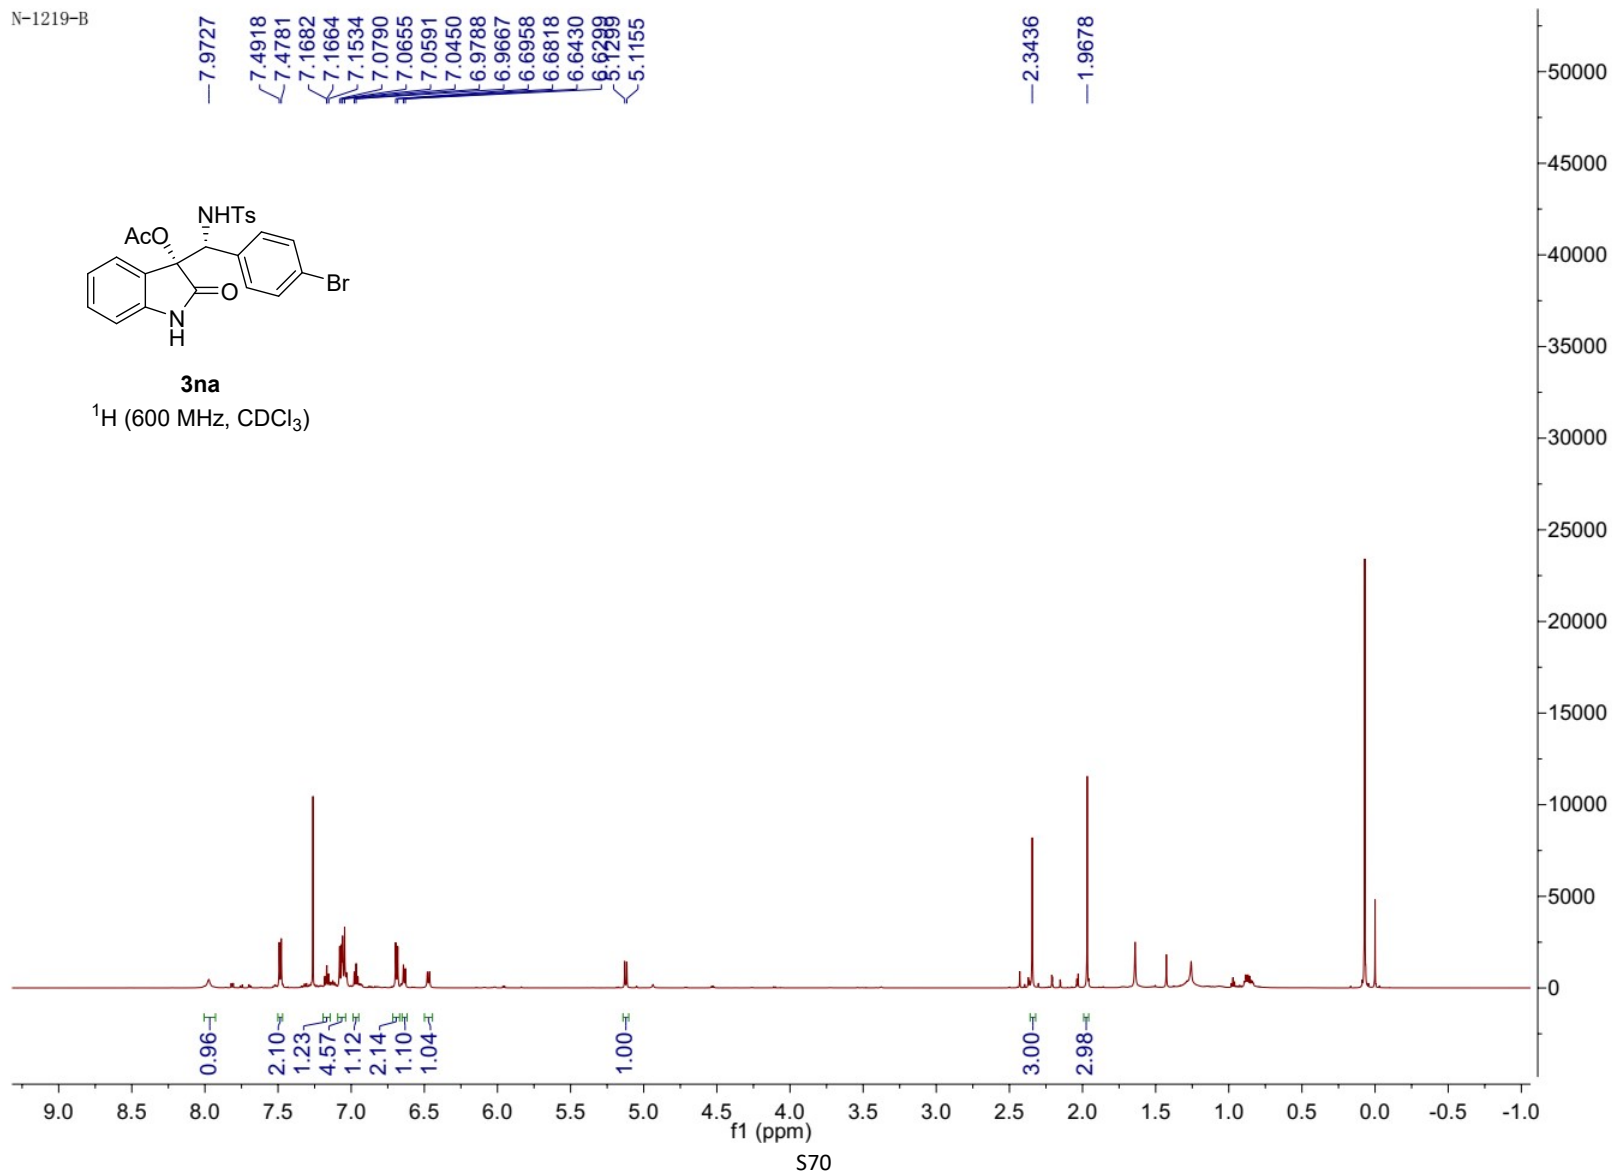

N-1219-B

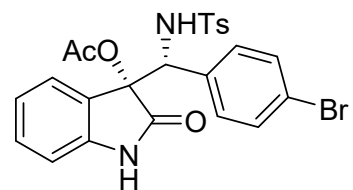

**3na**

$^{13}\text{C}$  (150 MHz,  $\text{CDCl}_3$ )

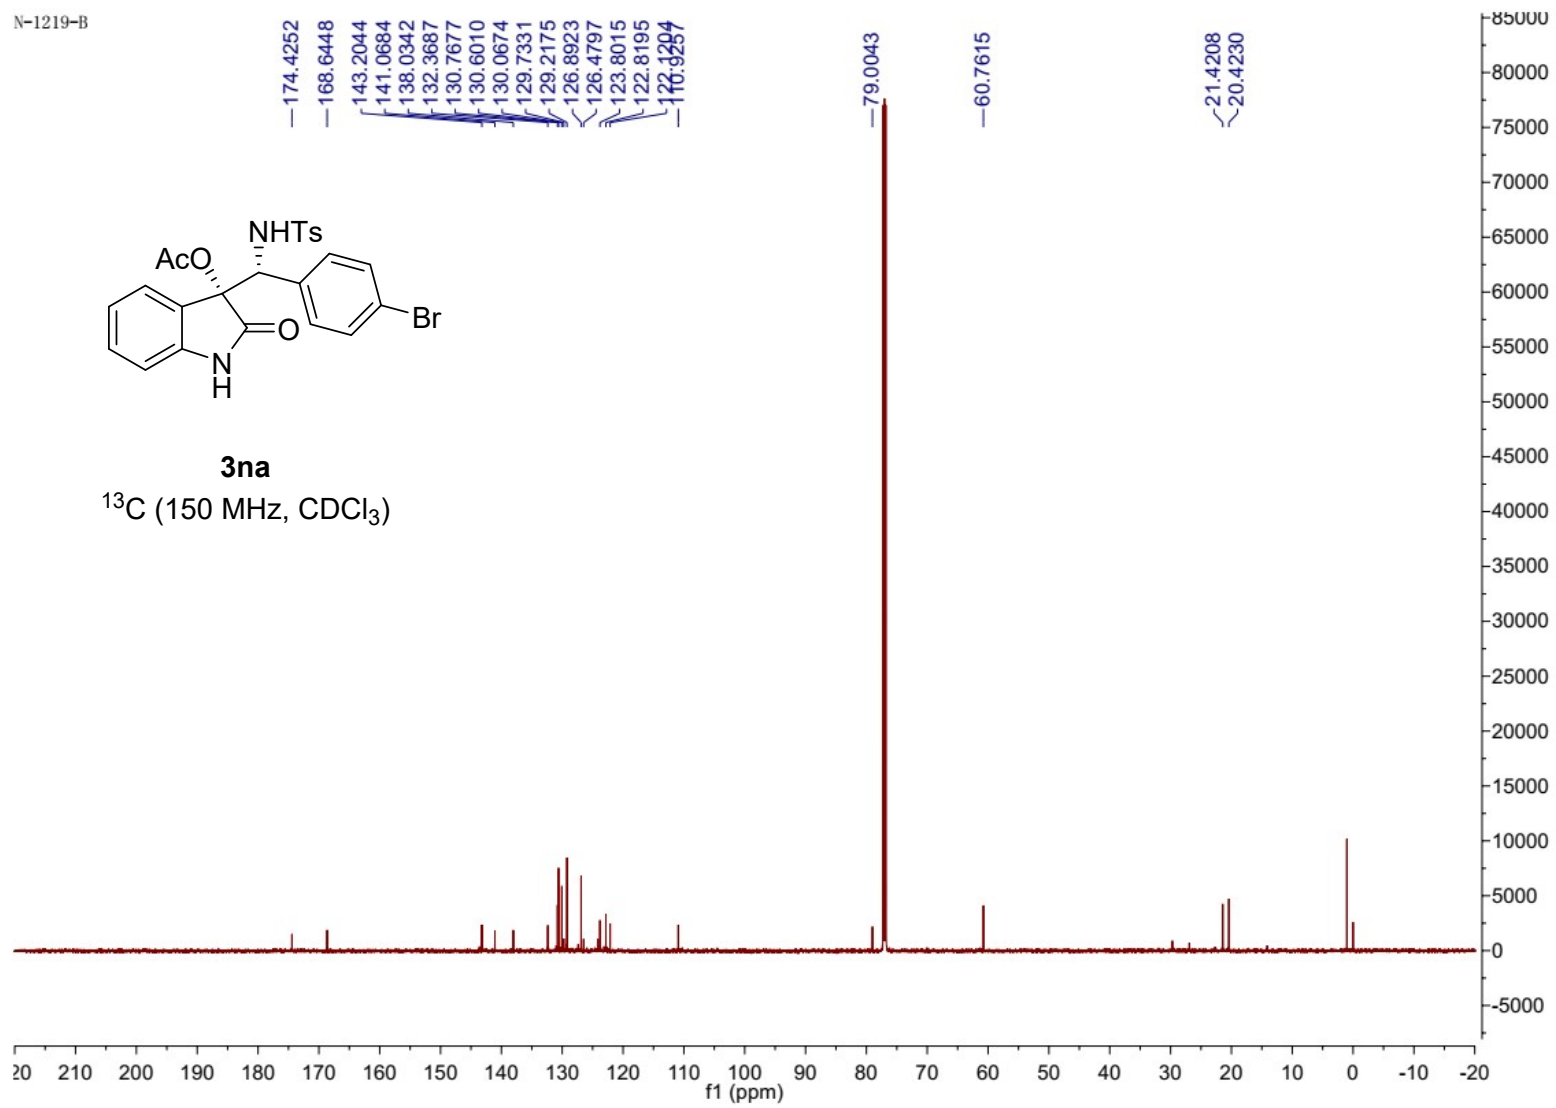

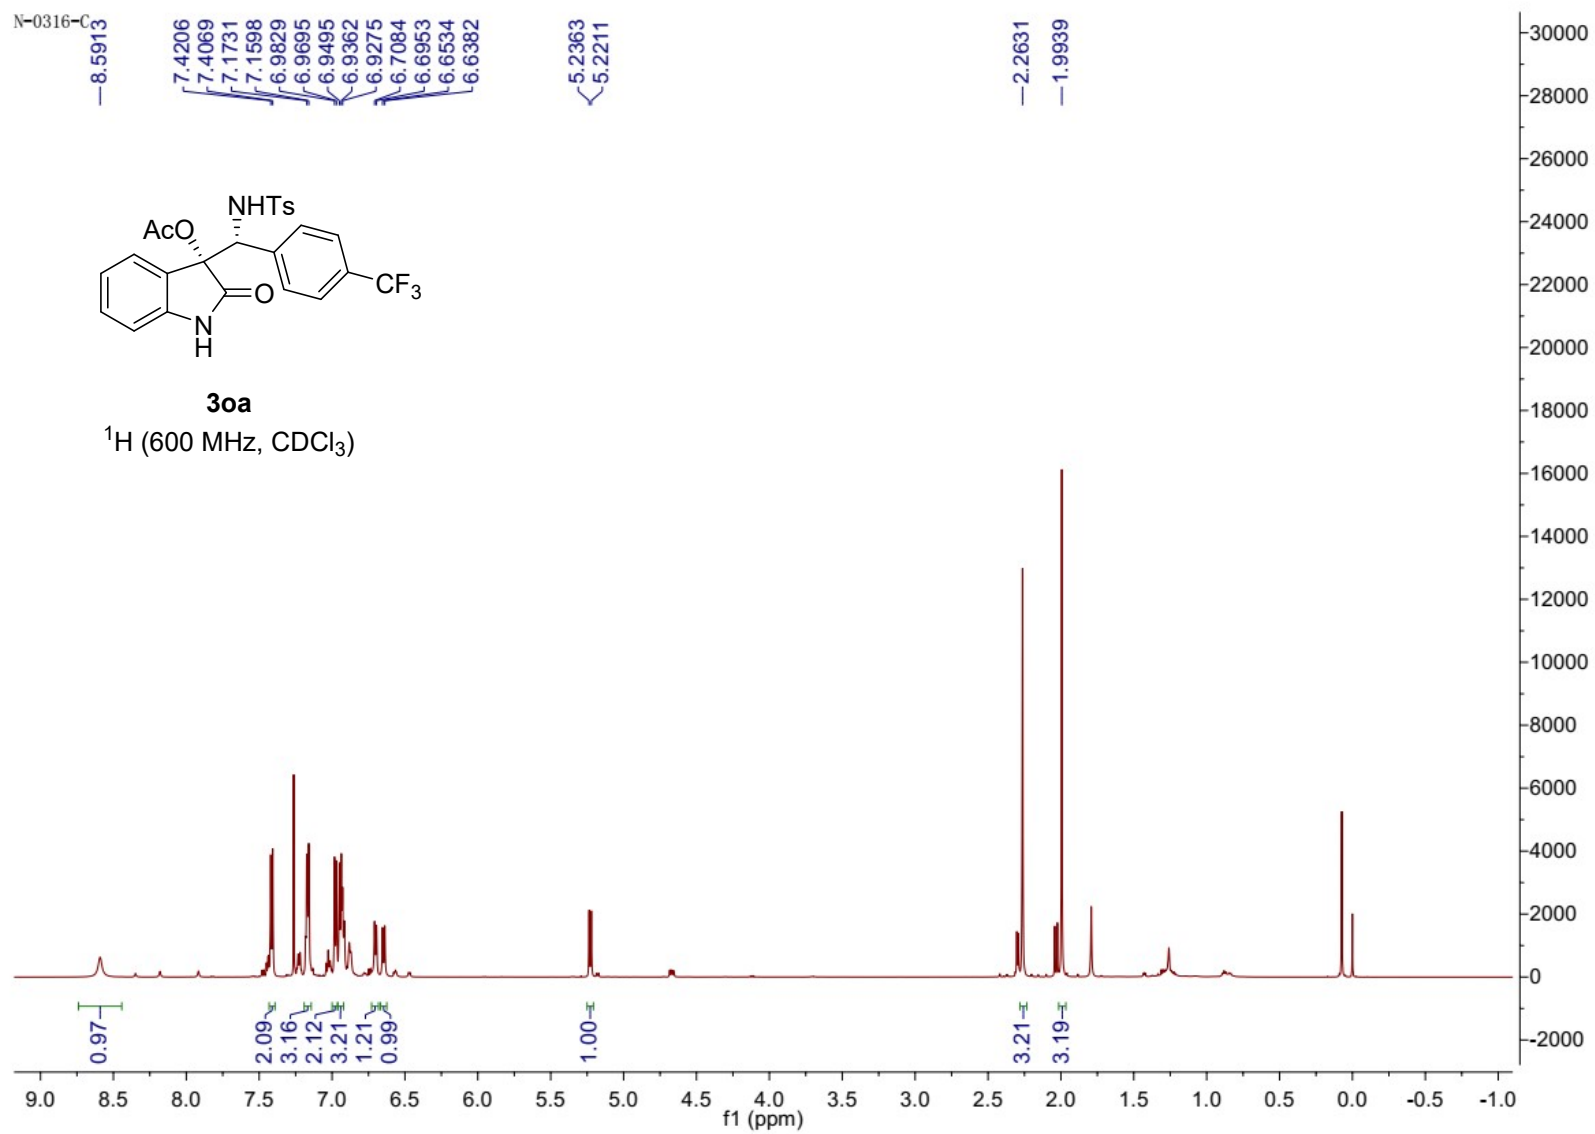



N-0316-C

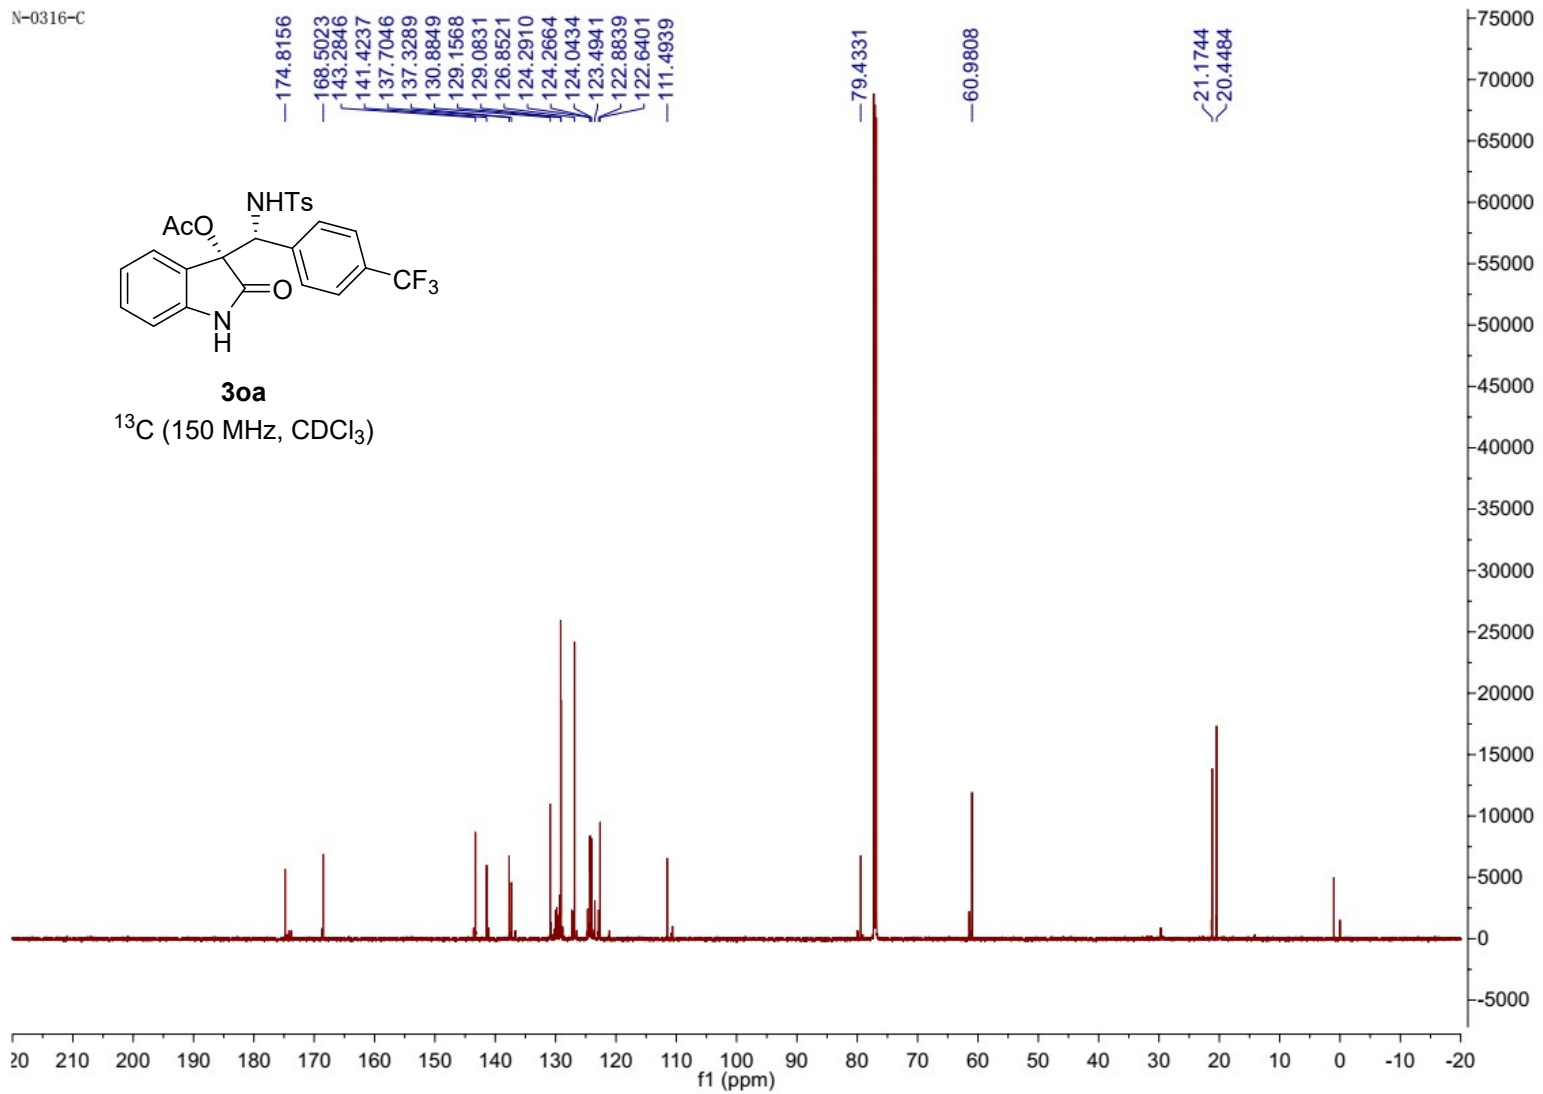

N-1227-D

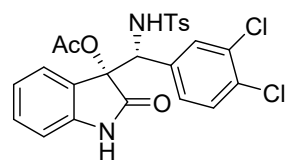

**3pa**

<sup>1</sup>H (600 MHz, CDCl<sub>3</sub>)

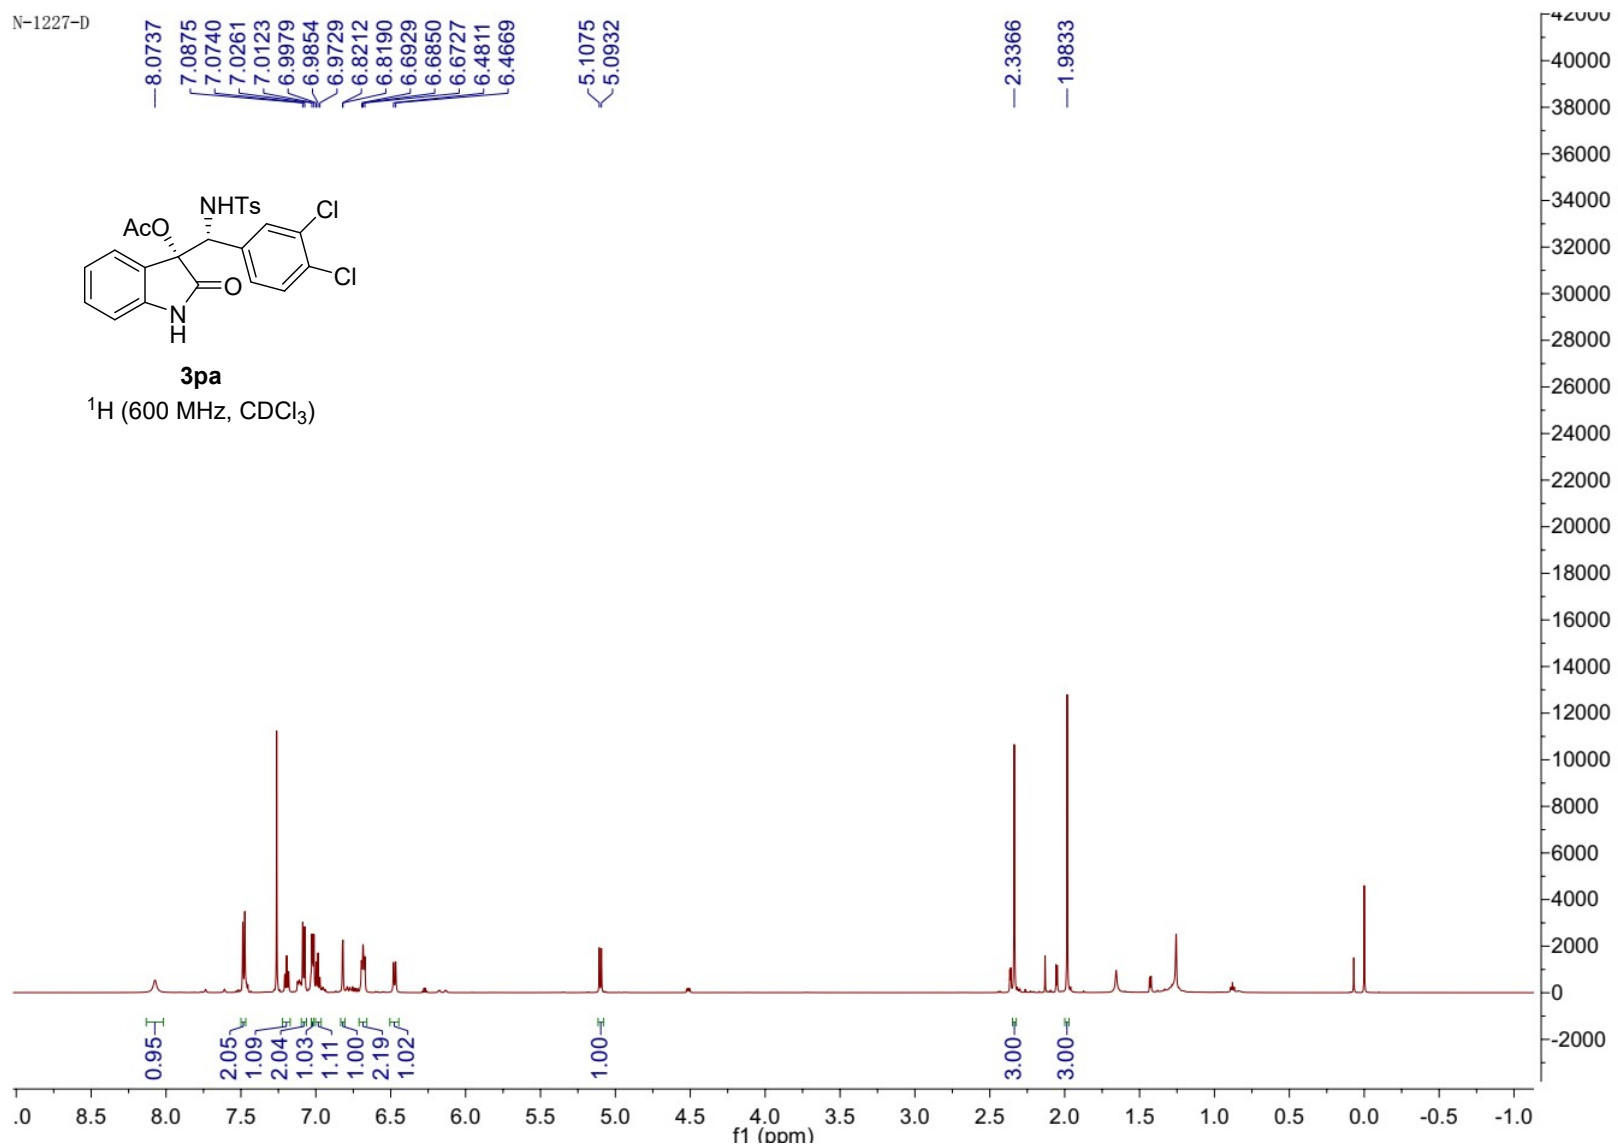

N-1227-D

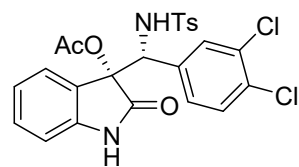

**3pa**

<sup>13</sup>C (150 MHz, CDCl<sub>3</sub>)

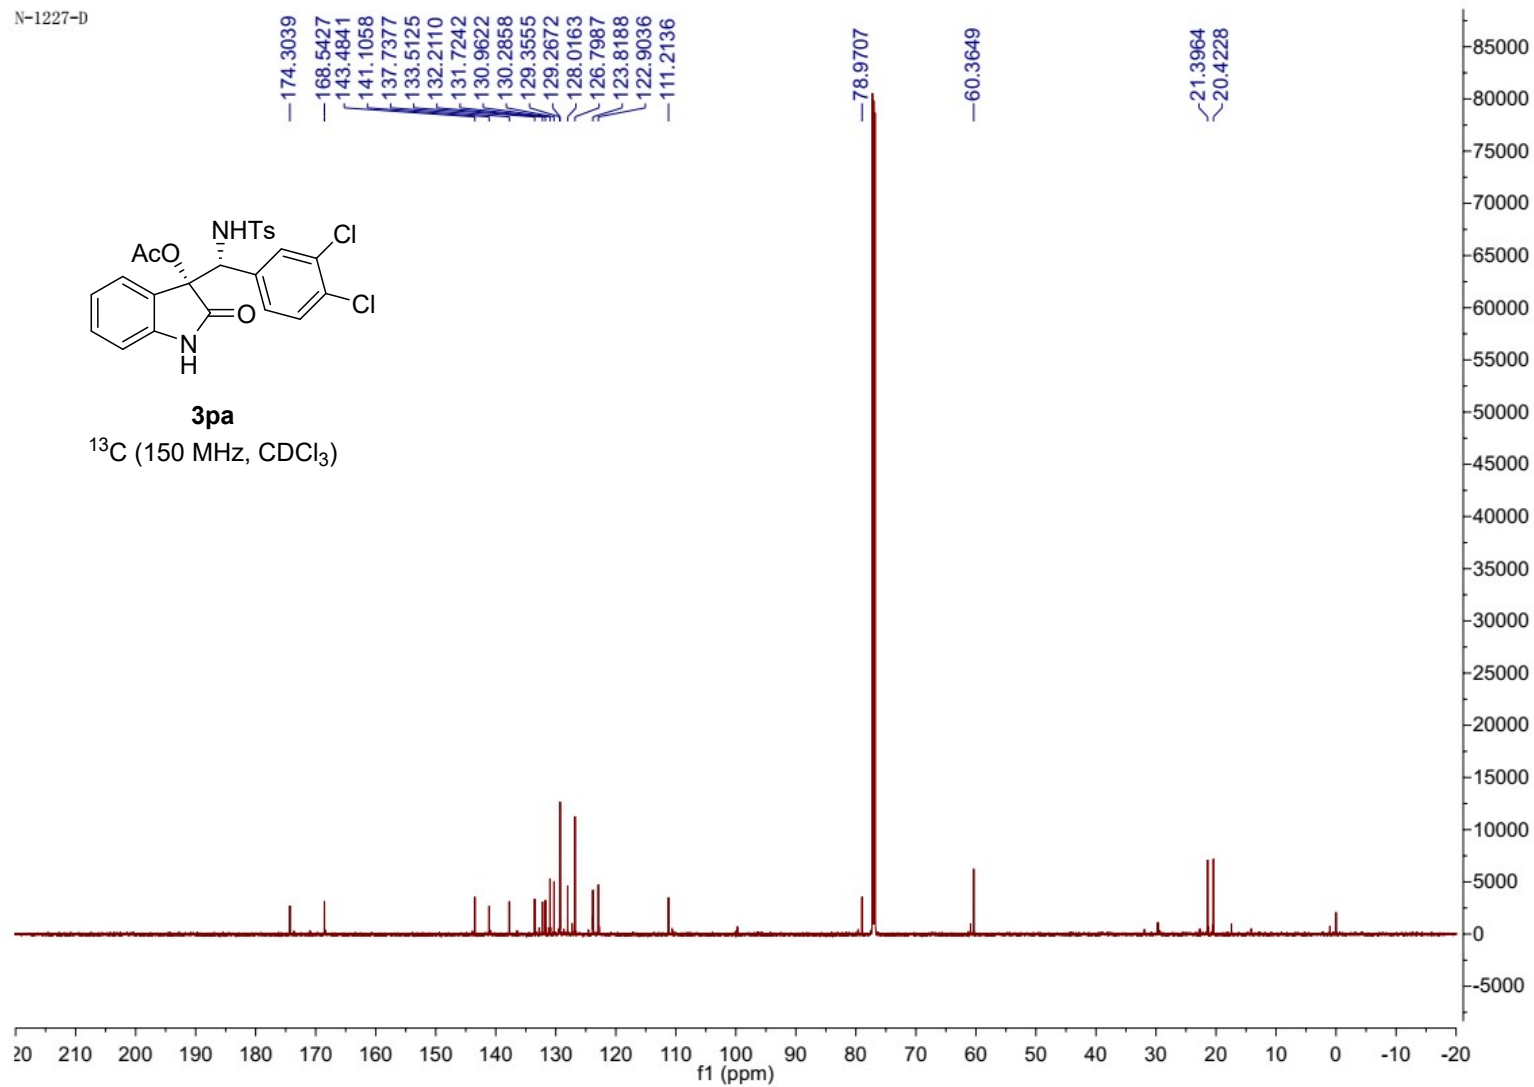

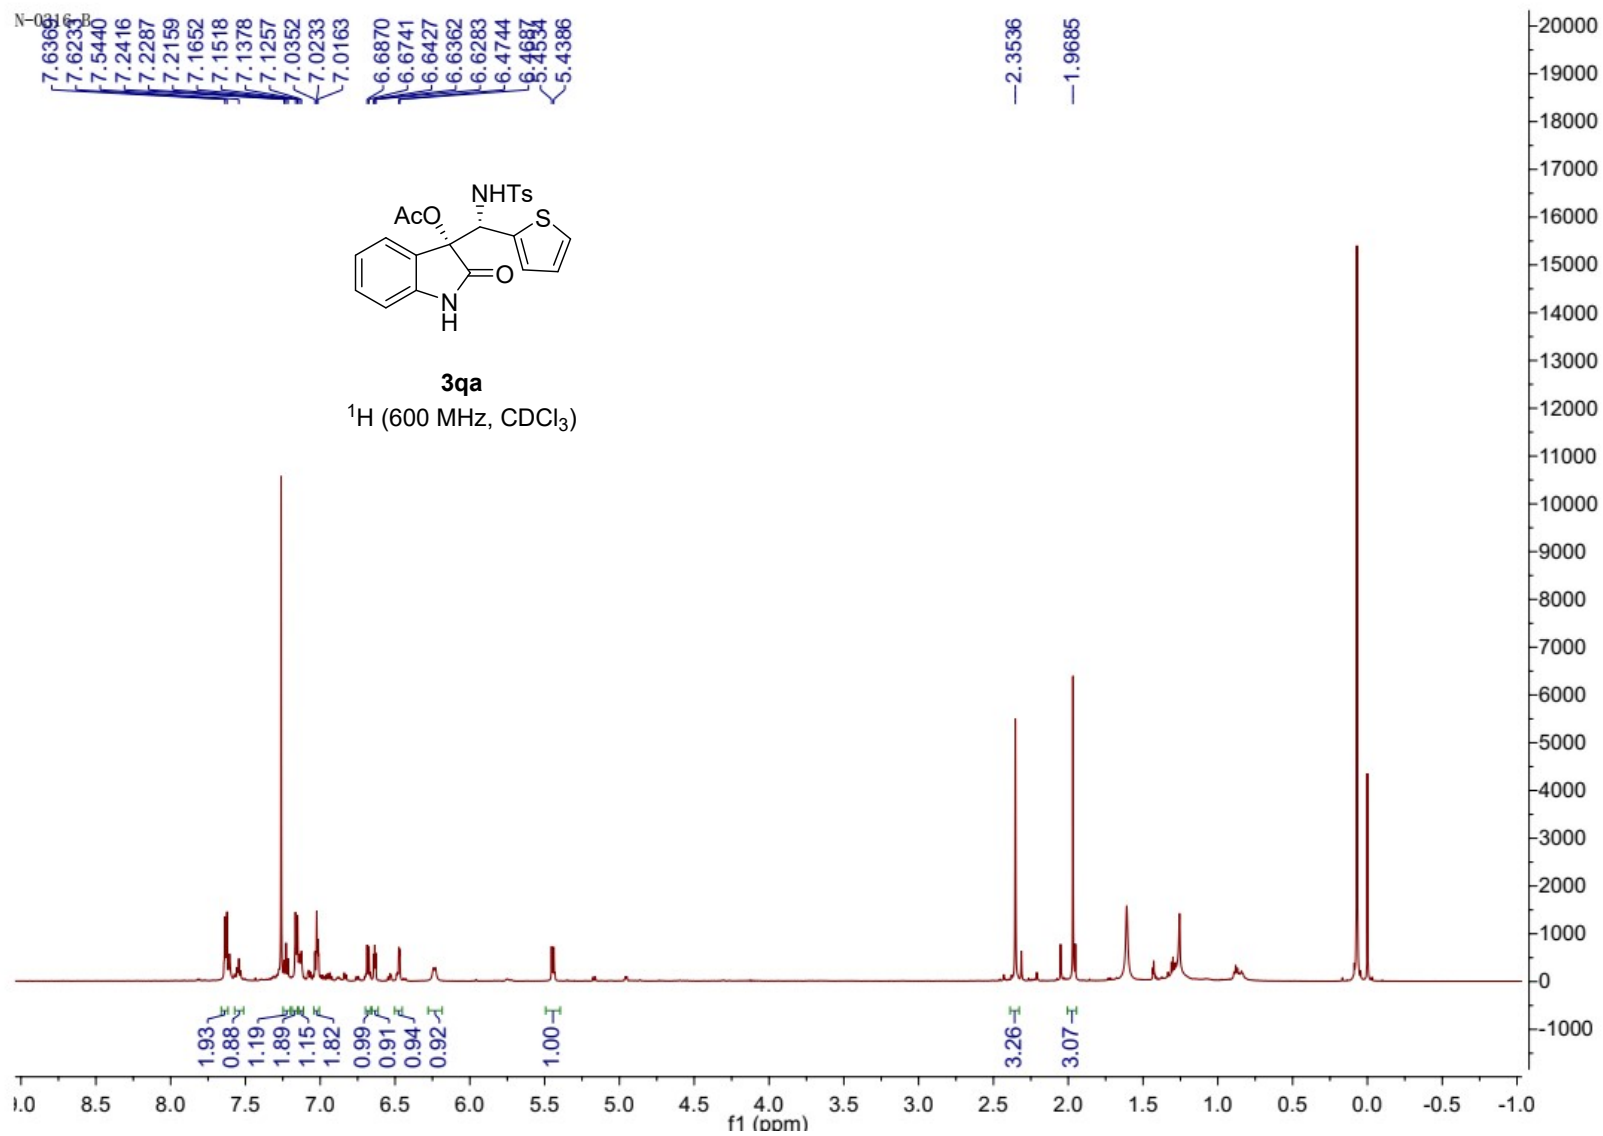

N-0316-B

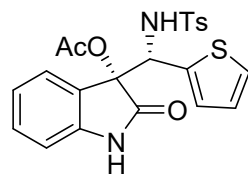

**3qa**

$^{13}\text{C}$  (150 MHz,  $\text{CDCl}_3$ )

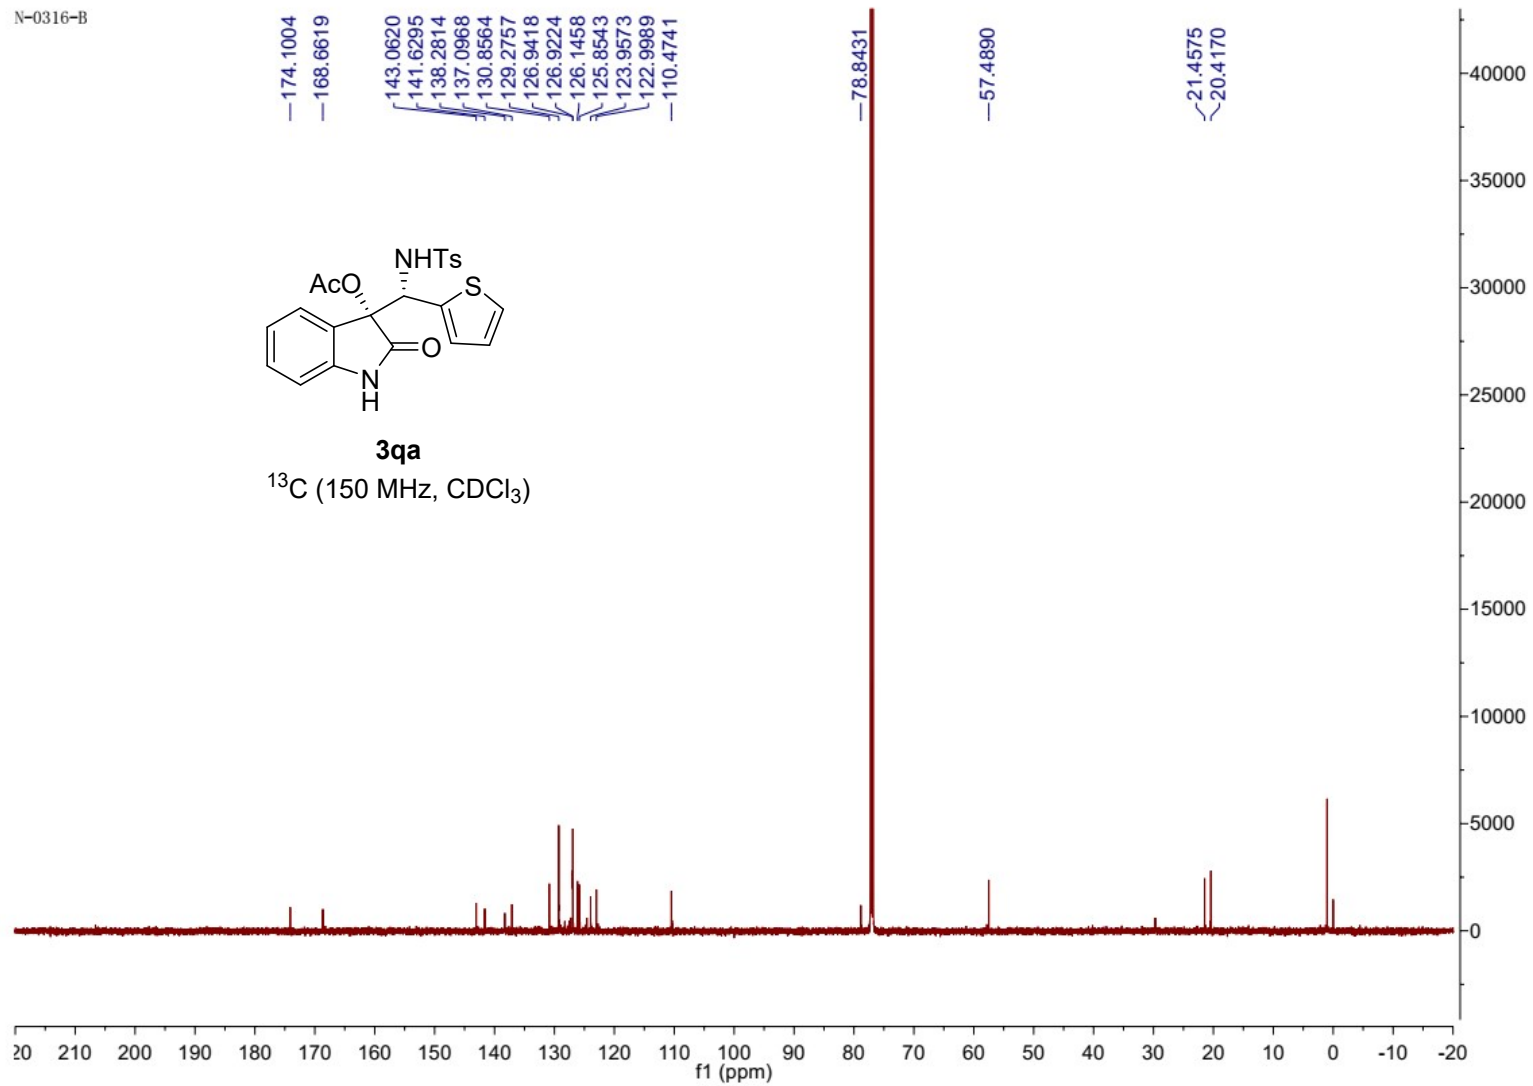

N34-R1-1

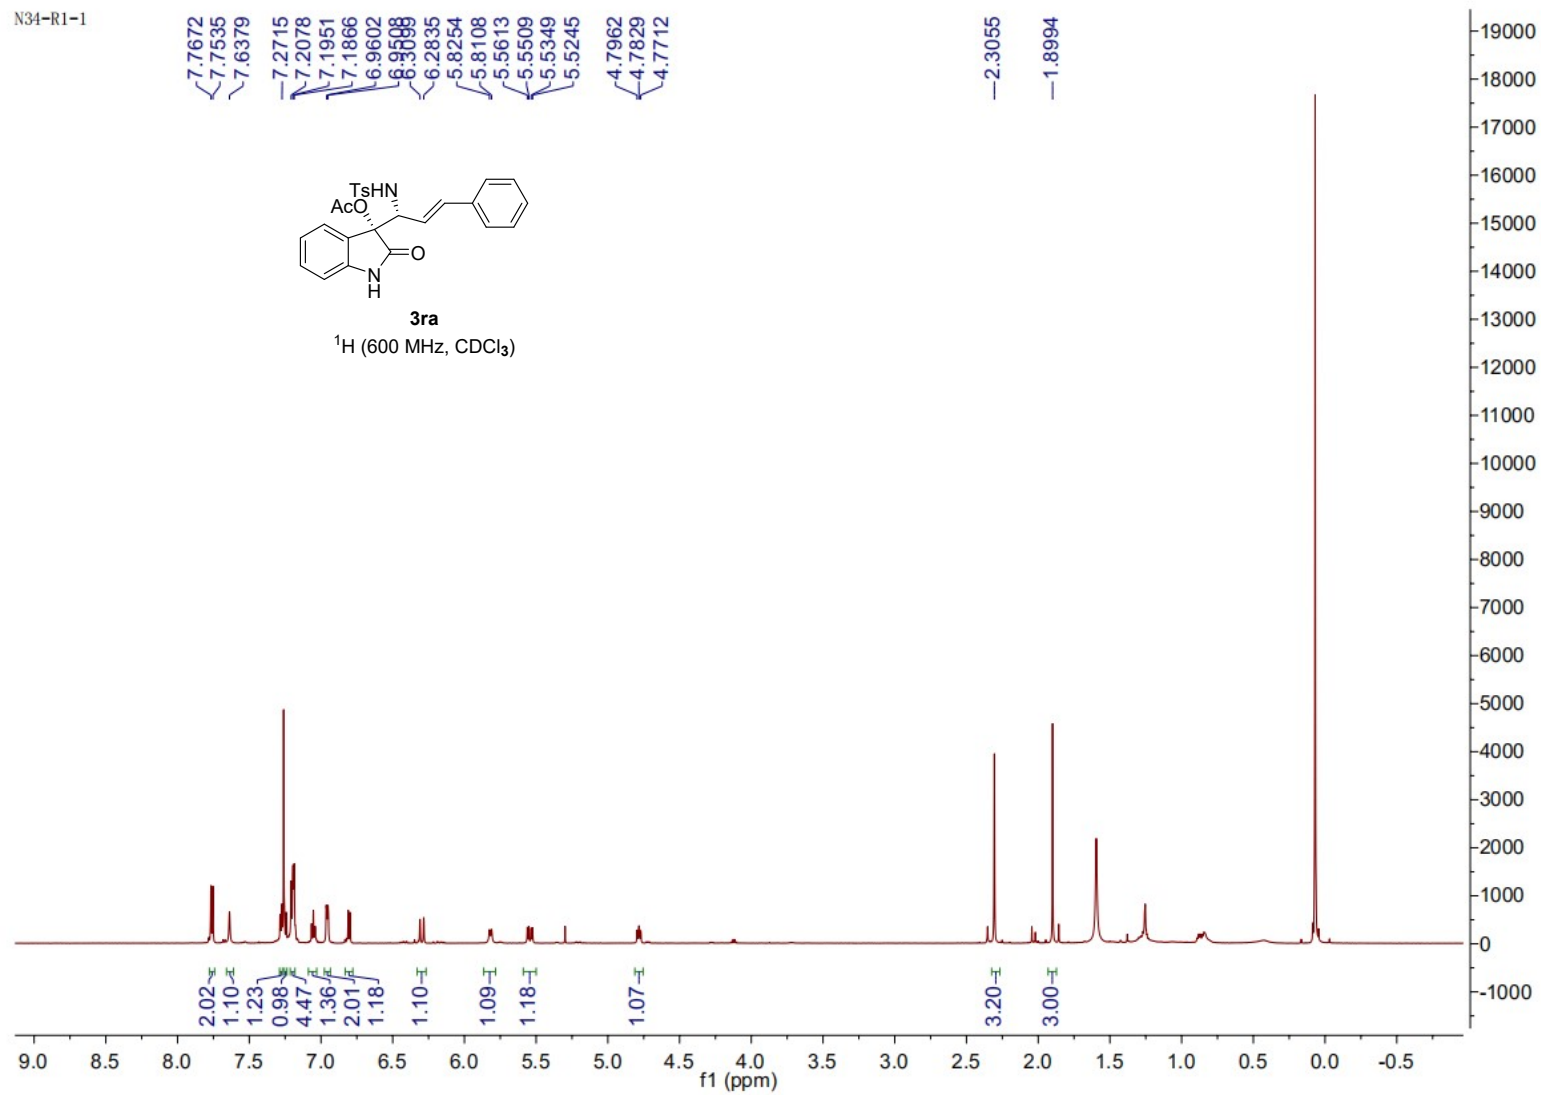

N34-R1-1

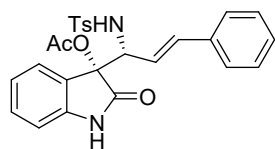

<sup>13</sup>C (150 MHz, CDCl<sub>3</sub>)

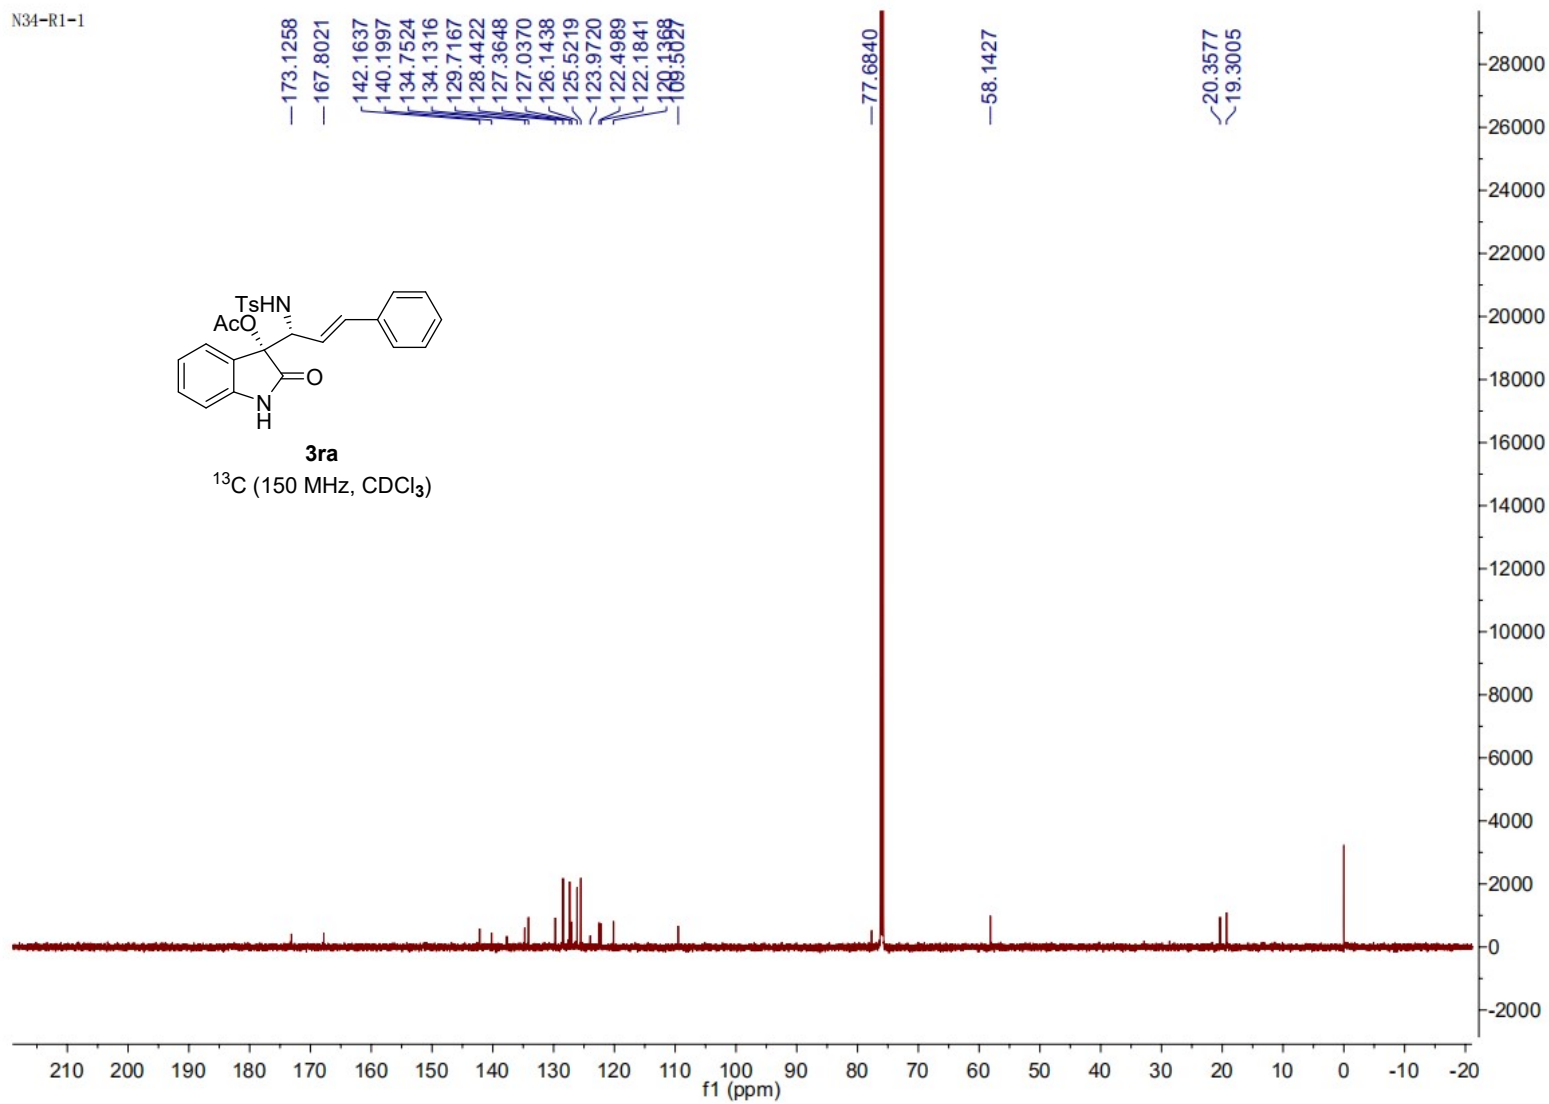

N-1223-A

8.9475

7.3224  
7.3087

6.9168  
6.9074  
6.8947  
6.8636  
6.8567  
6.7242  
6.4448  
6.4283  
5.5051

2.4058  
2.2362  
1.9894

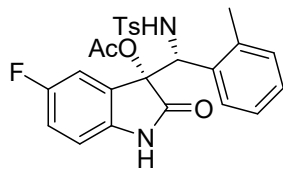

**3bb**

<sup>1</sup>H (600 MHz, CDCl<sub>3</sub>)

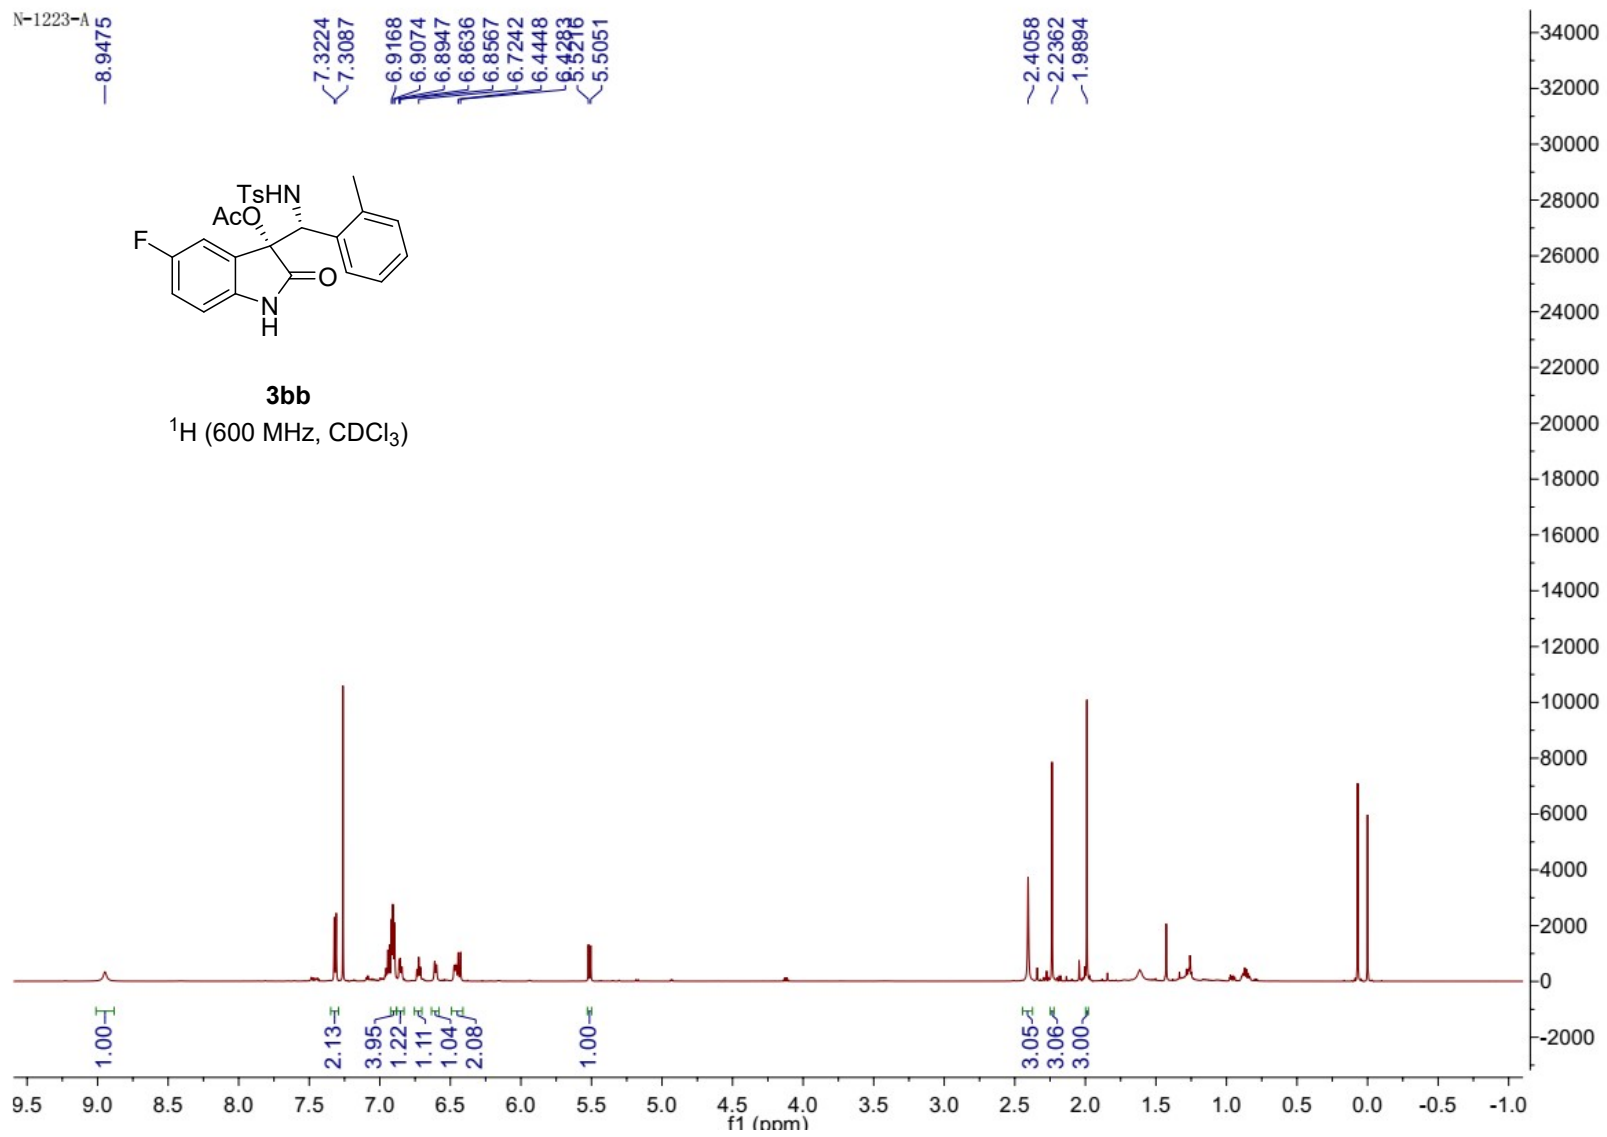



N-1223-A

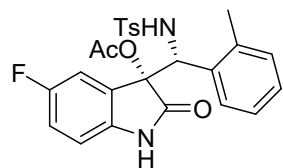

**3bb**

$^{13}\text{C}$  (150 MHz,  $\text{CDCl}_3$ )

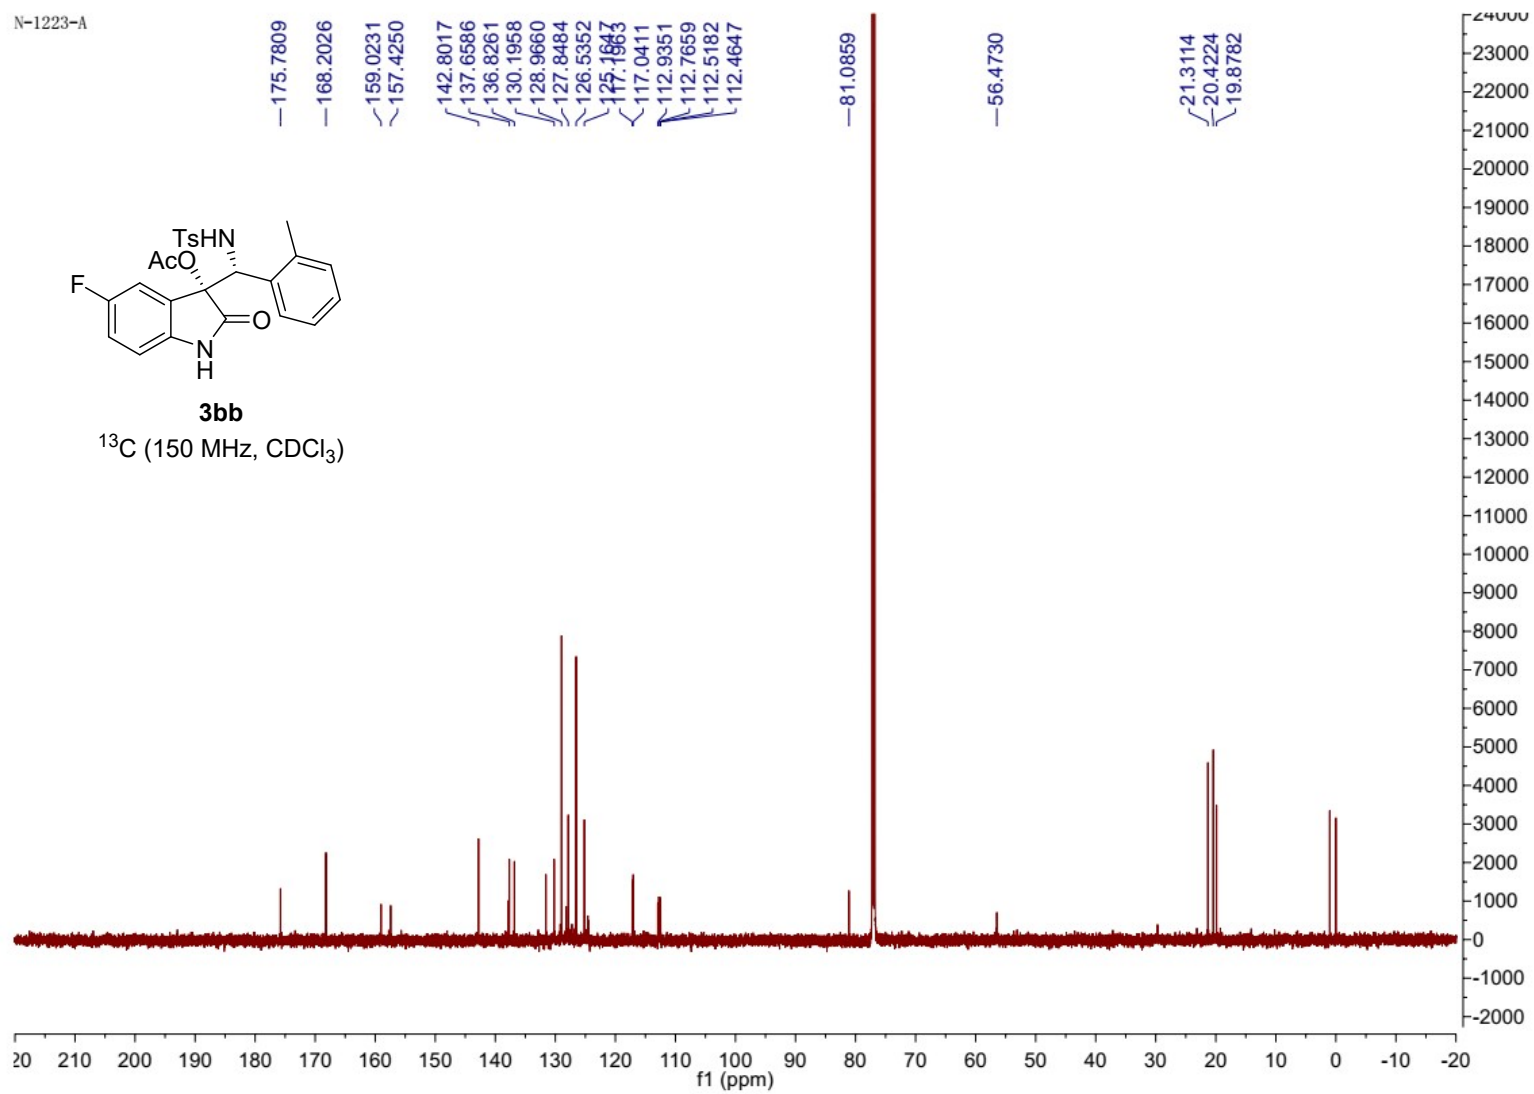

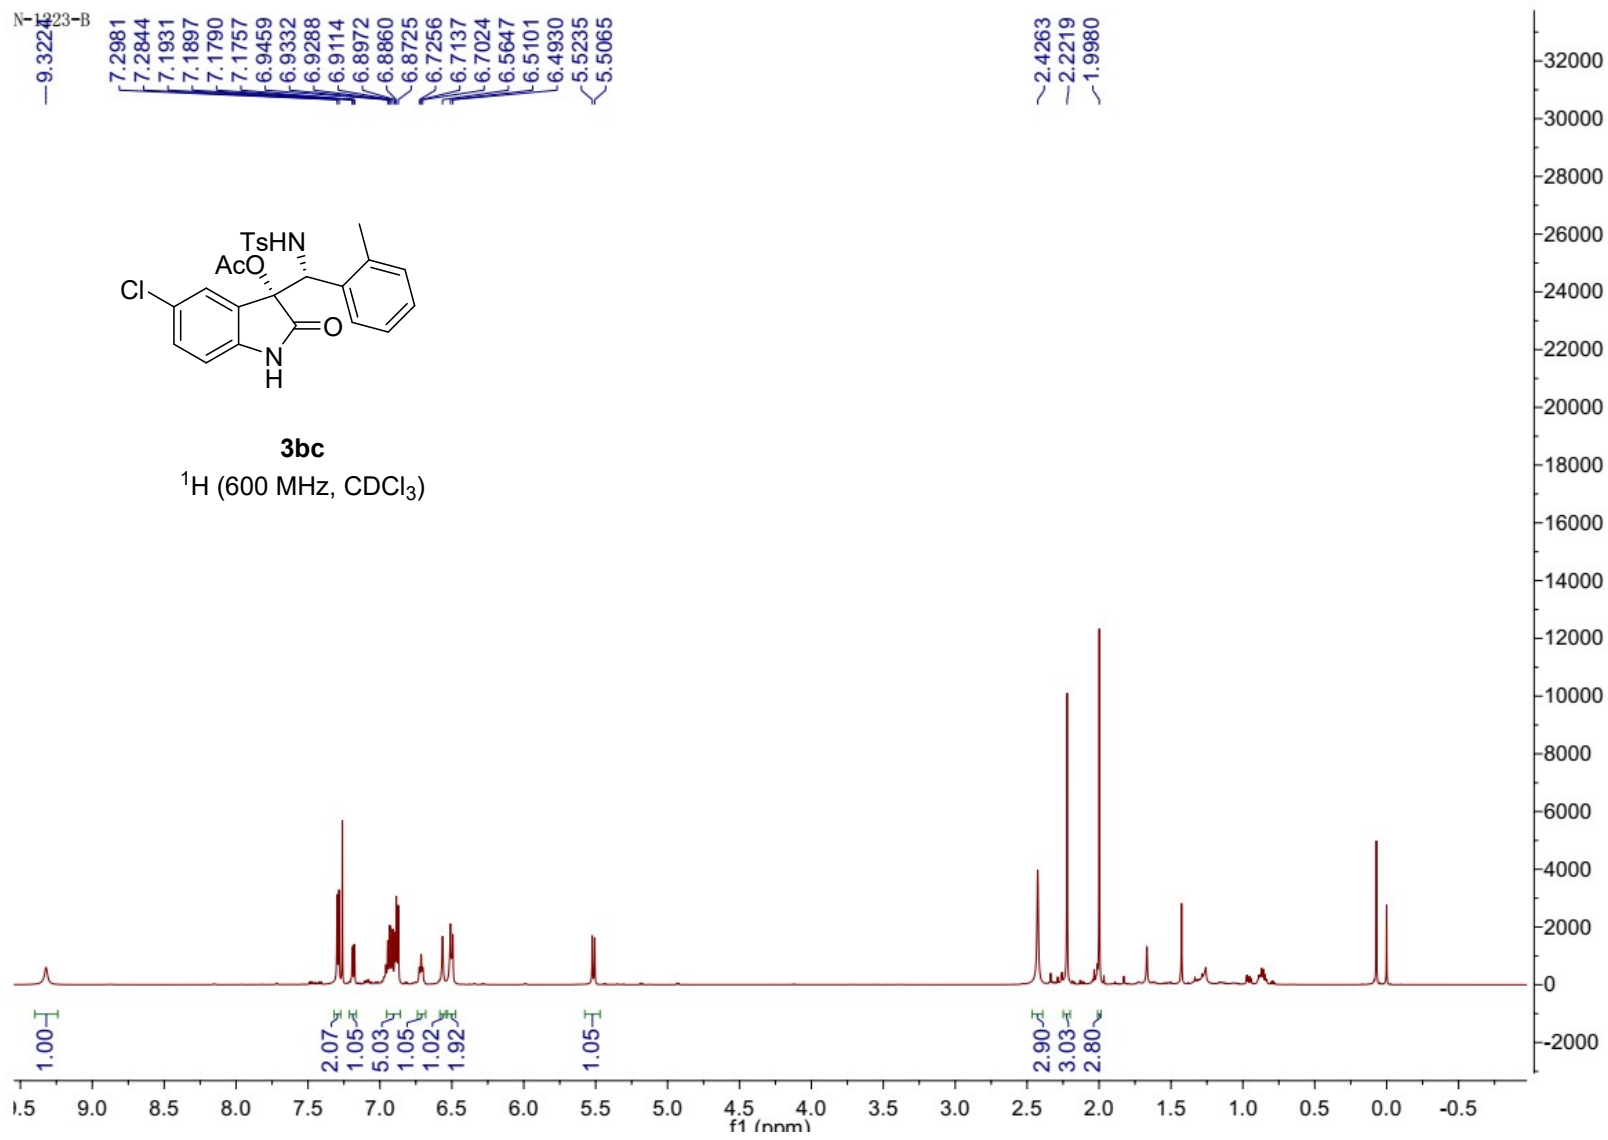

N-1223-B

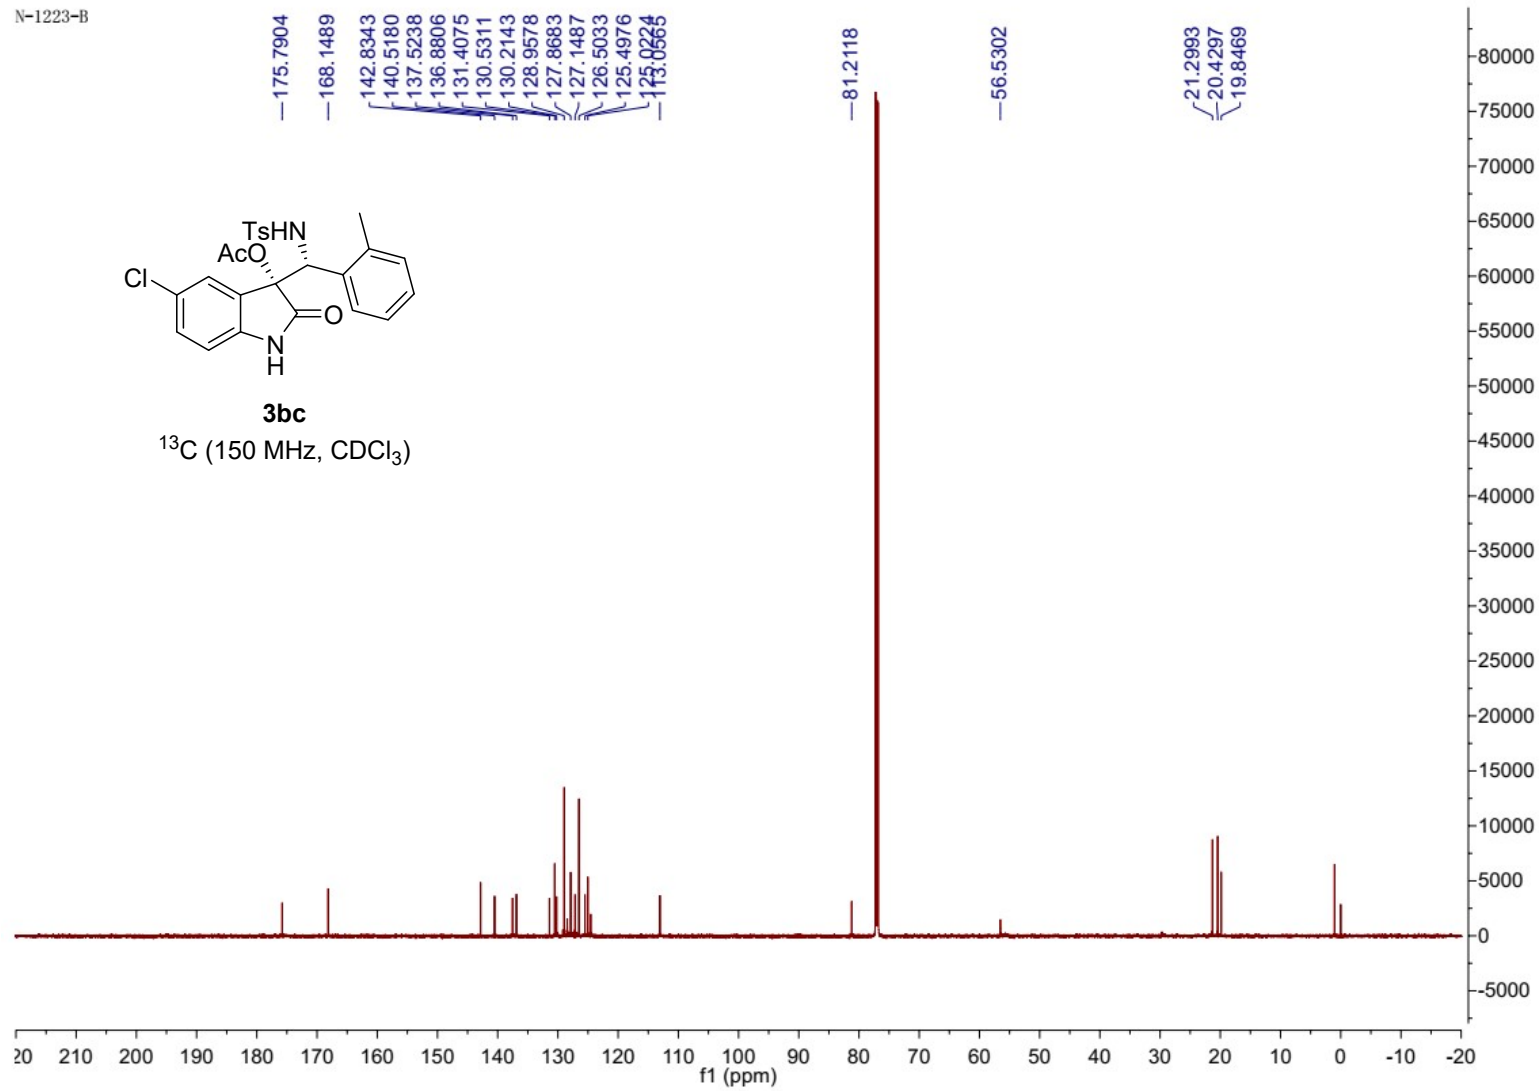

N-1223-C

8.4601

7.3698

7.3562

6.9418

6.9285

6.8863

6.7556

6.7499

6.7175

6.4661

6.3811

6.3655

5.5014

3.6438

2.3681

2.2528

1.9720

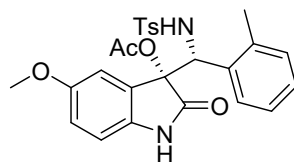

**3bd**

$^1\text{H}$  (600 MHz,  $\text{CDCl}_3$ )

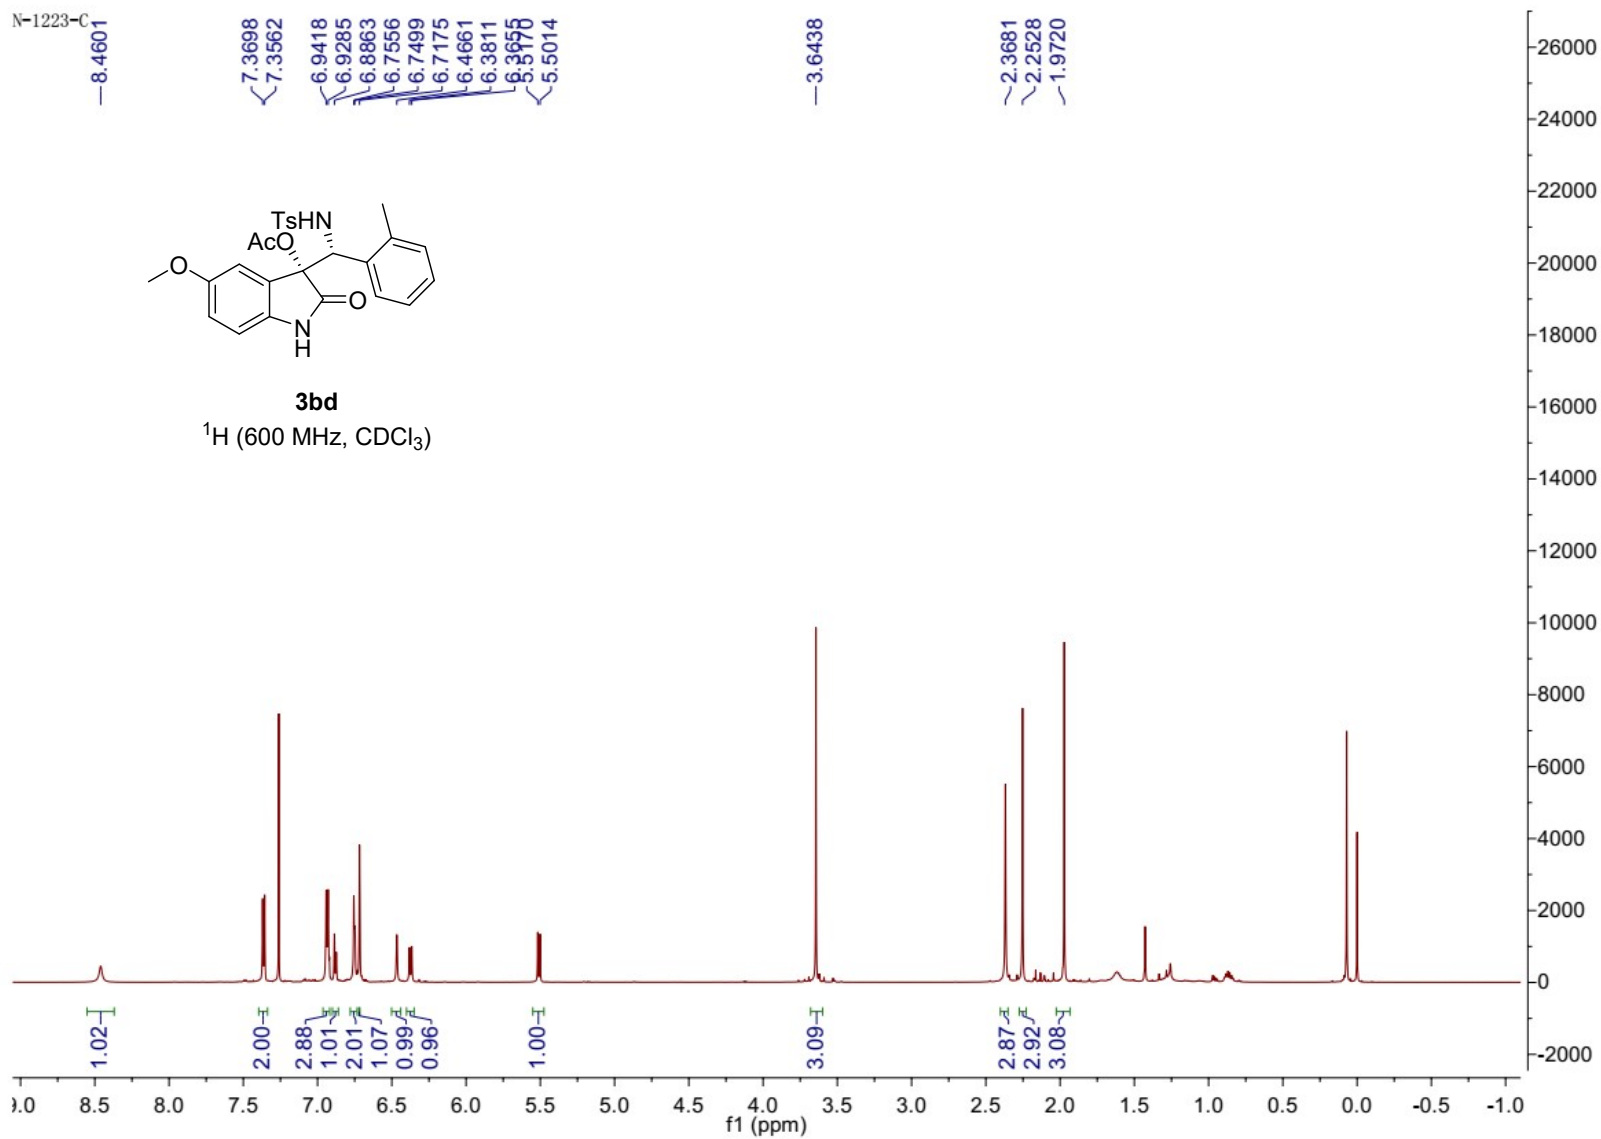

N-1223-C

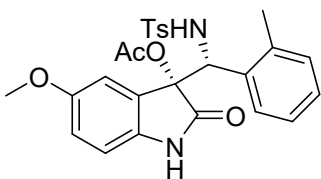

**3bd**

<sup>13</sup>C (150 MHz, CDCl<sub>3</sub>)

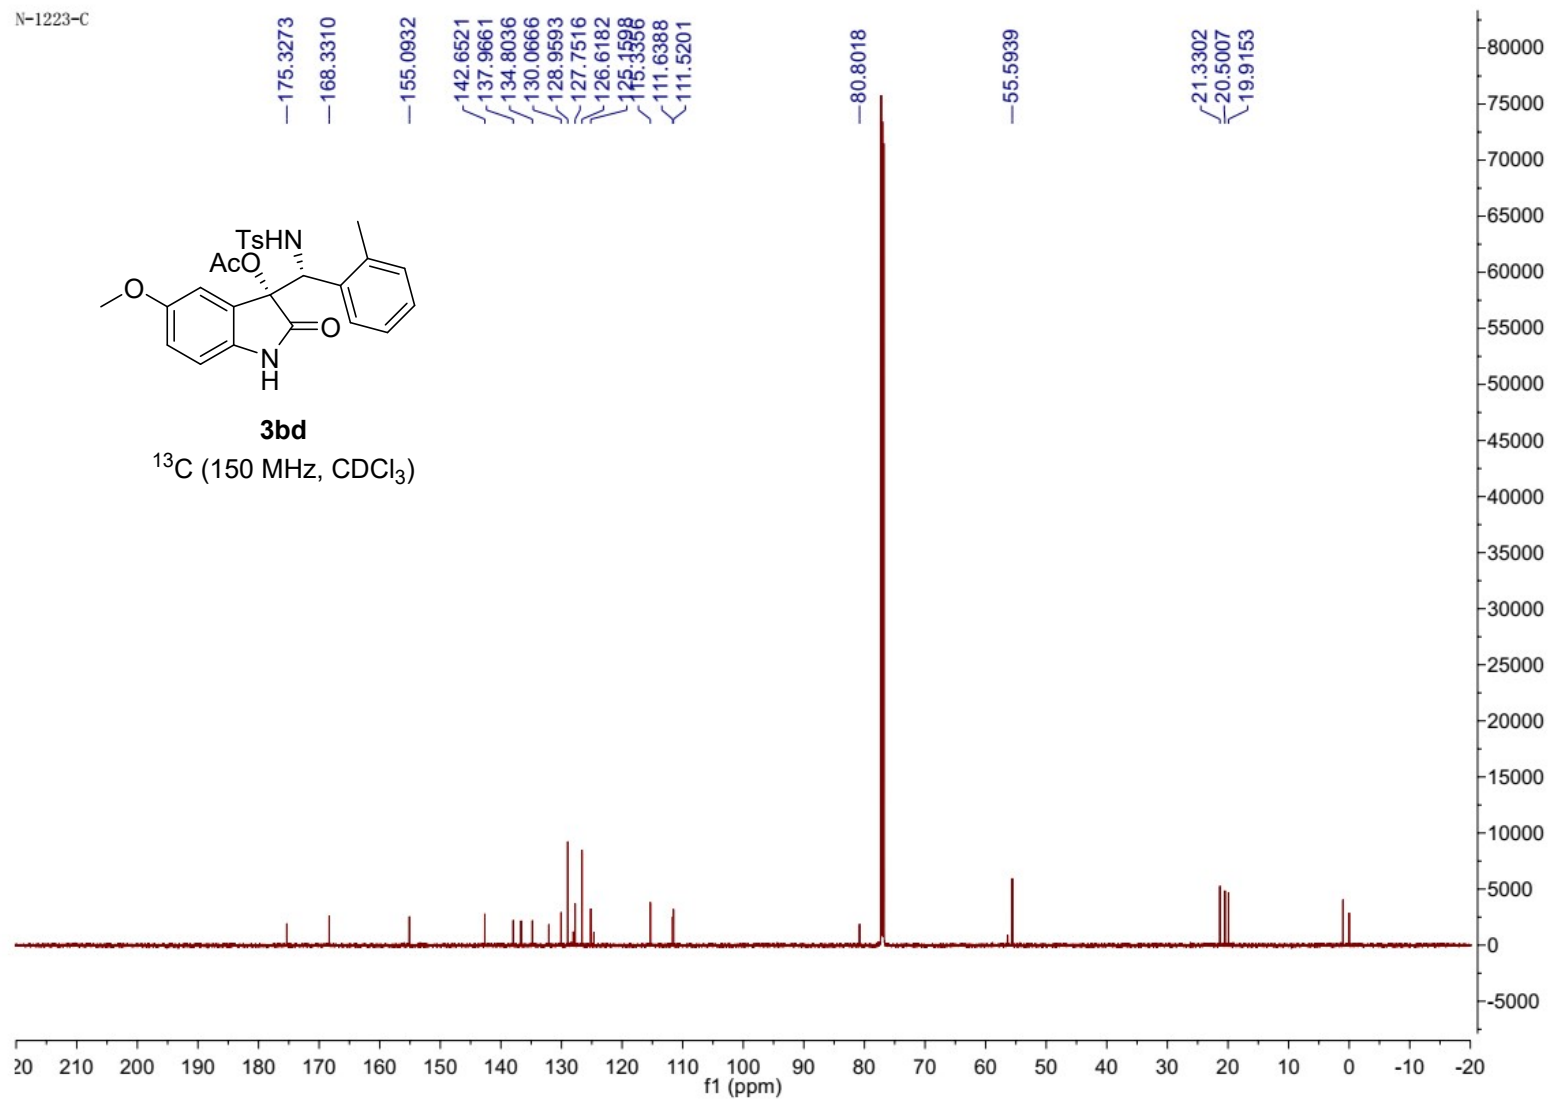

N-0322A

— 9.0224

7.3481  
7.3348  
7.0537  
7.0411  
7.0248  
7.0120  
6.9018  
6.8891  
6.7961  
6.7835  
6.7709  
6.6962  
6.3953  
6.3795  
5.5430  
5.5271

2.3878  
2.2536  
2.2362  
1.9453

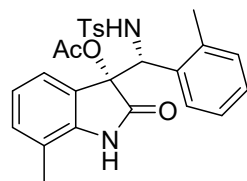

**3be**

<sup>1</sup>H (600 MHz, CDCl<sub>3</sub>)

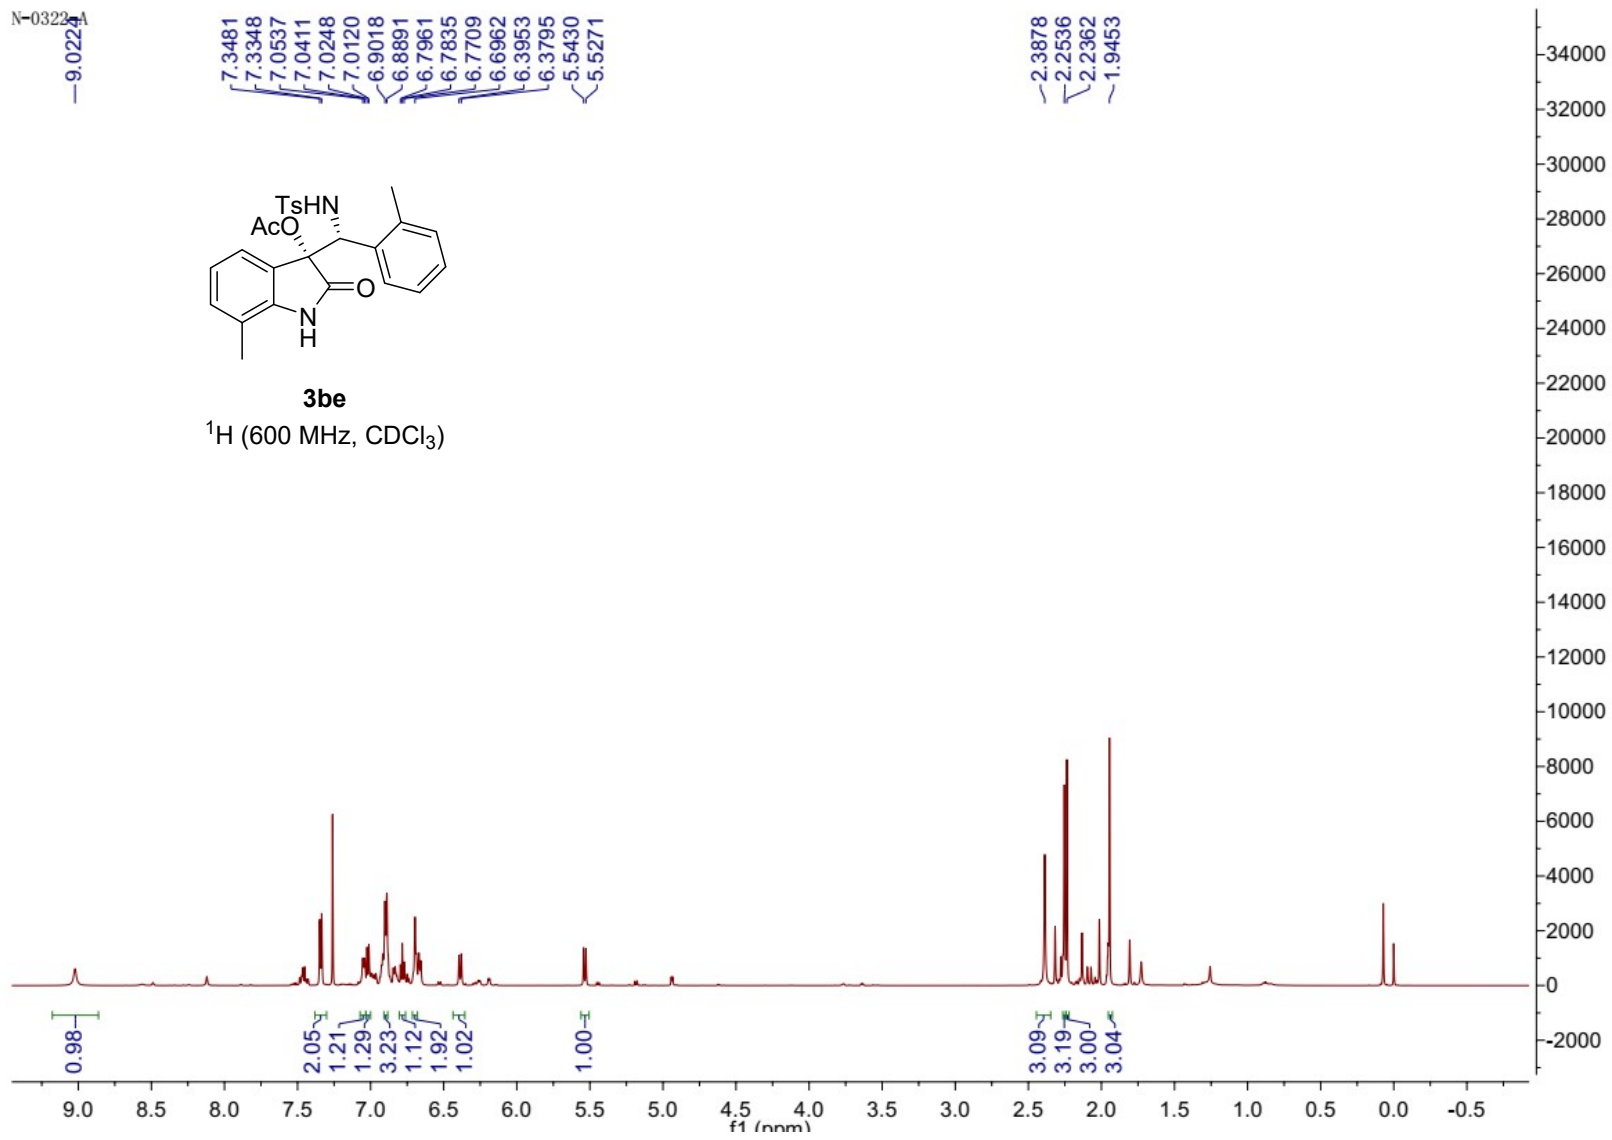

N-0322-A

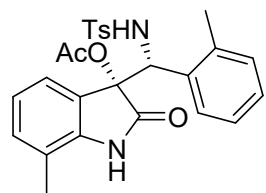

**3be**

$^{13}\text{C}$  (150 MHz,  $\text{CDCl}_3$ )

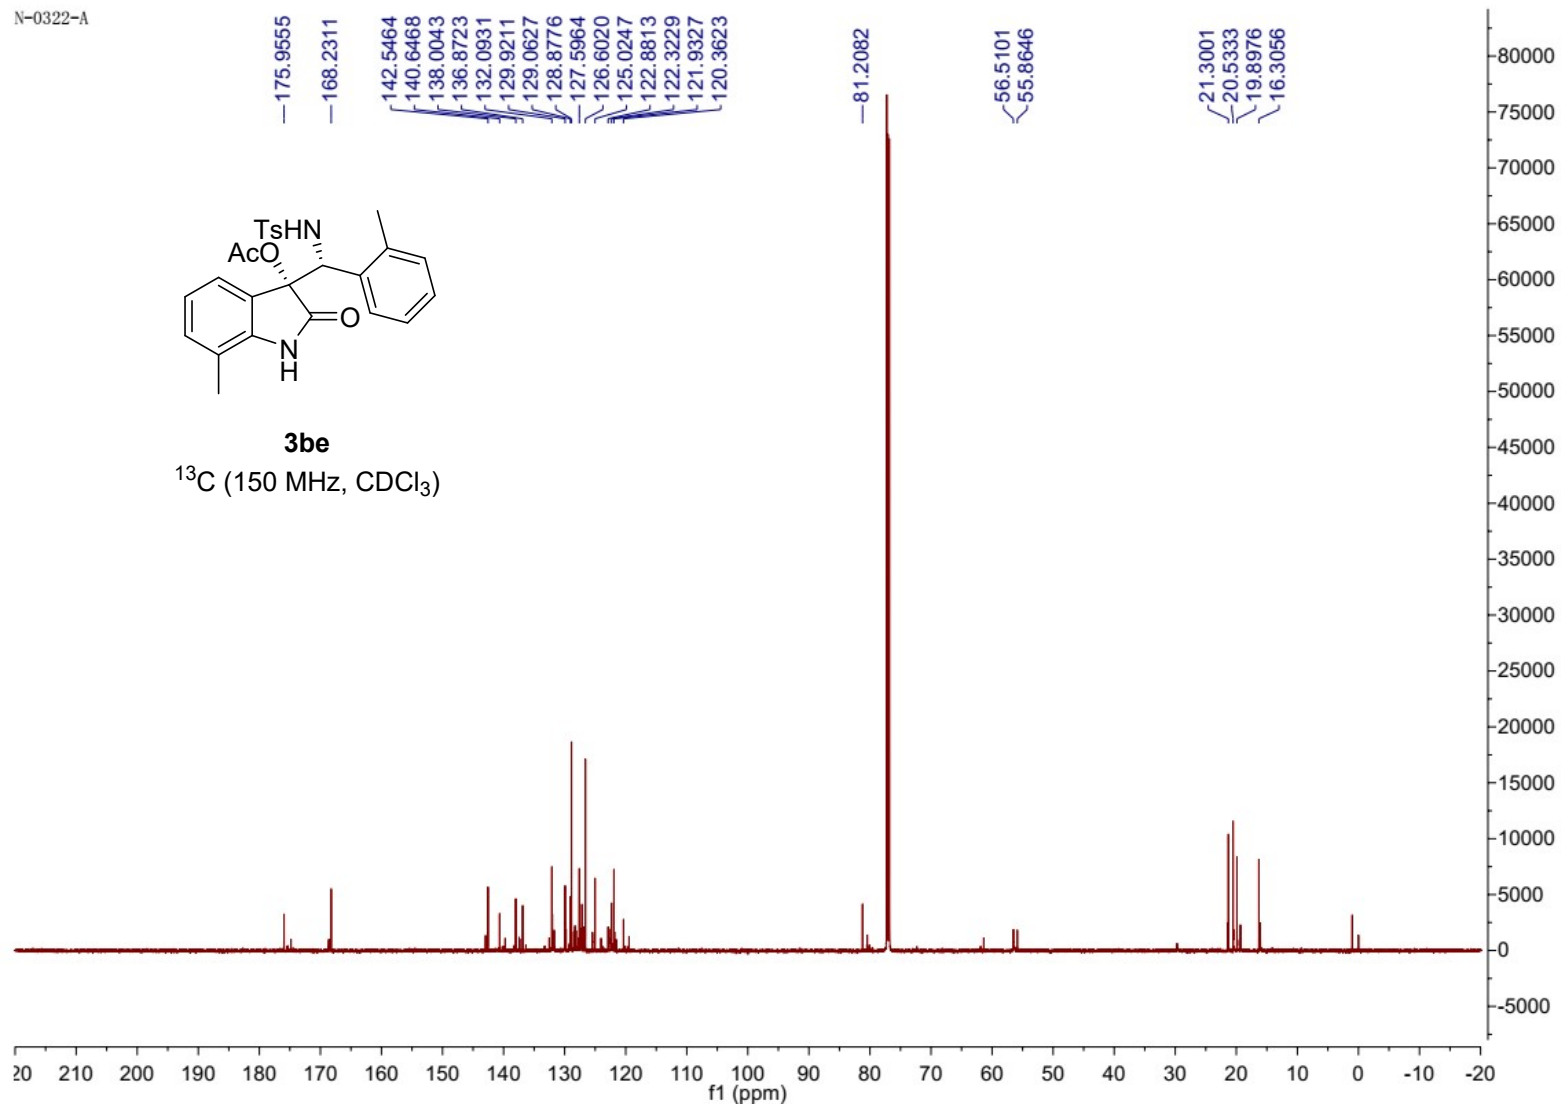

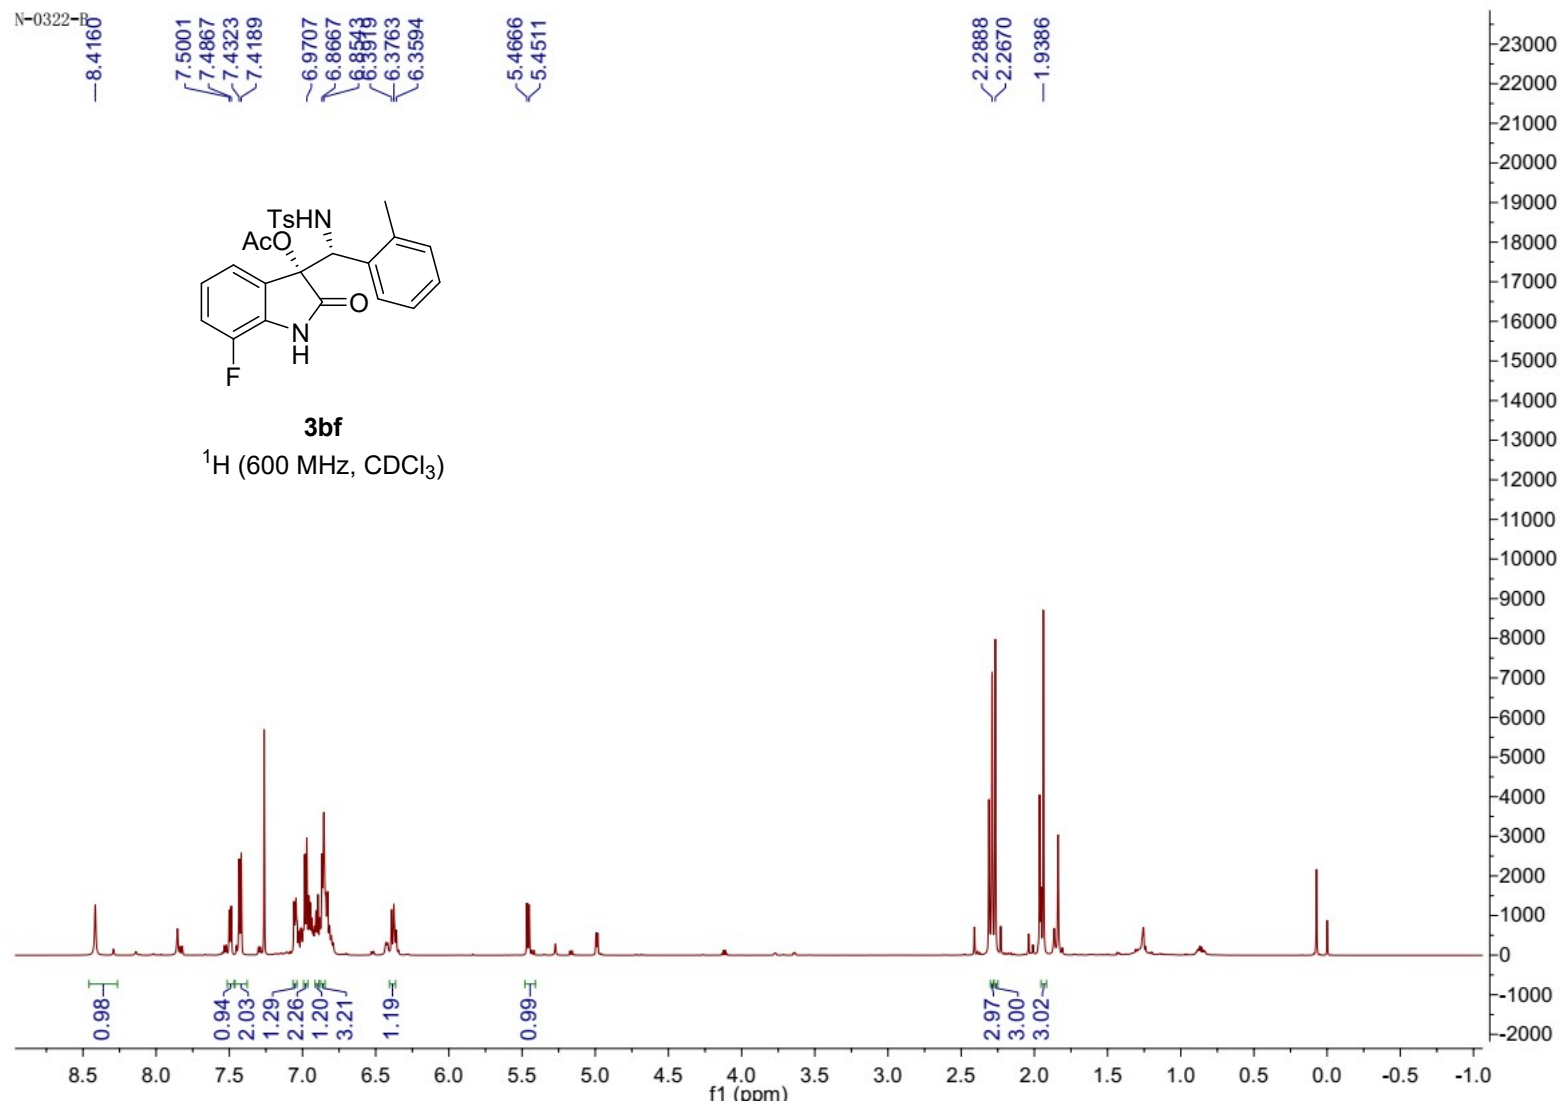



N-0322-B

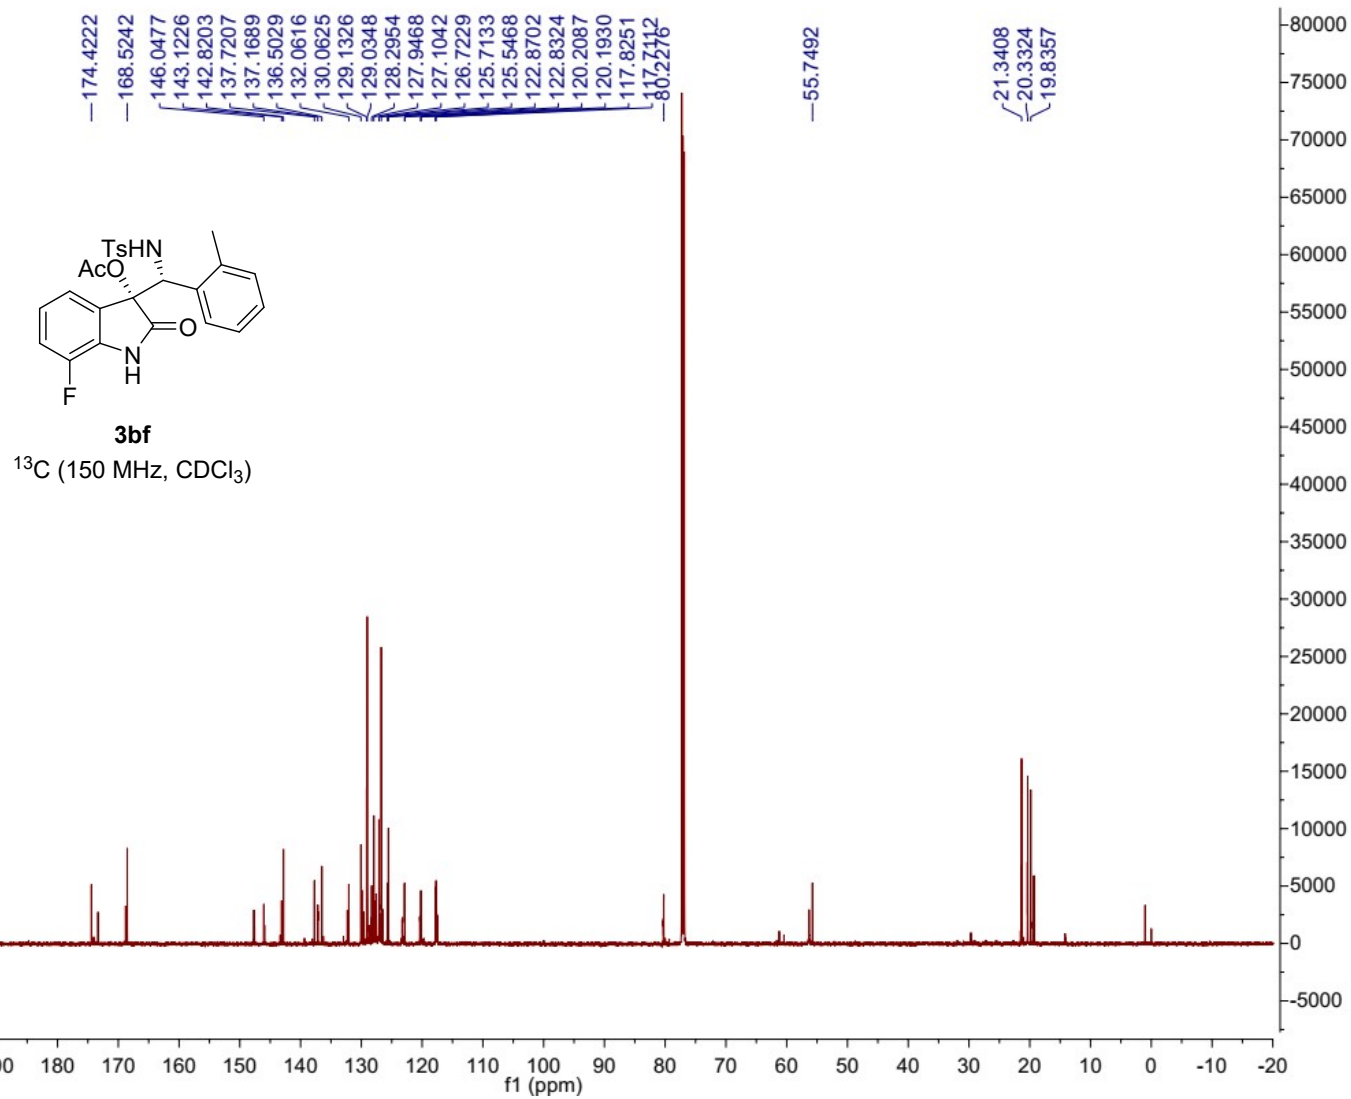

N-0420-B

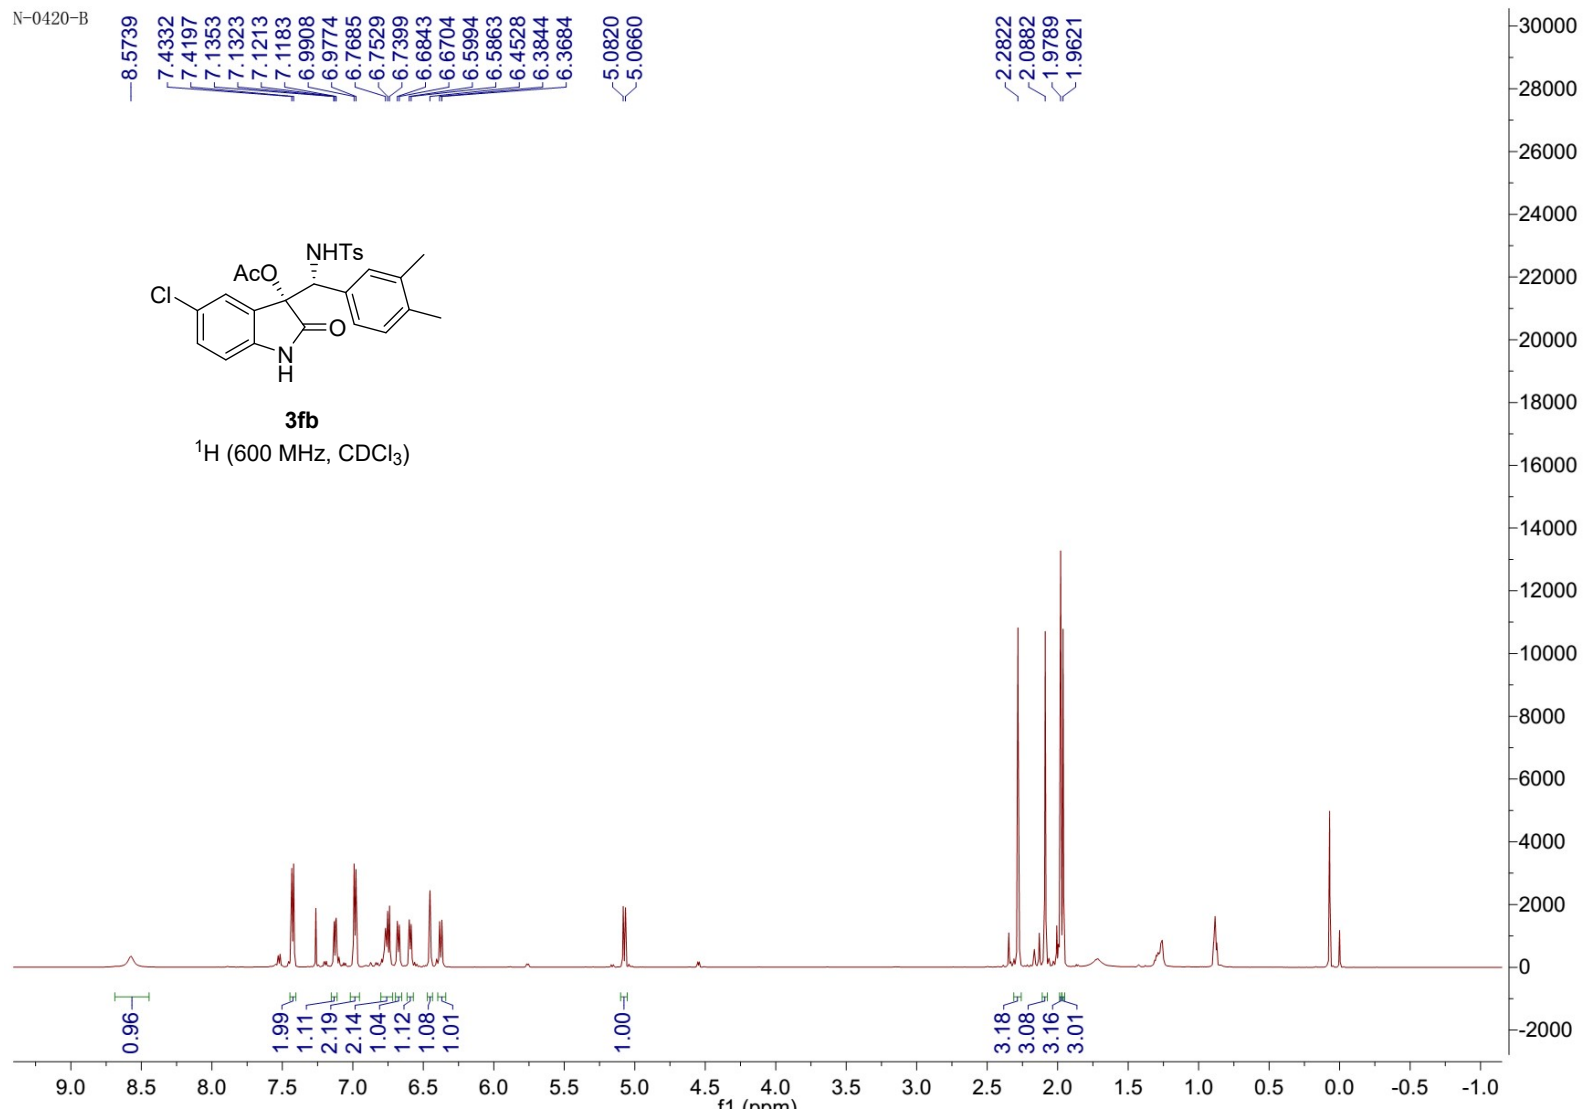

N-0420-B

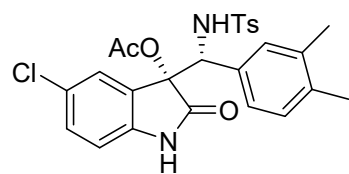

**3b**

<sup>13</sup>C (150 MHz, CDCl<sub>3</sub>)

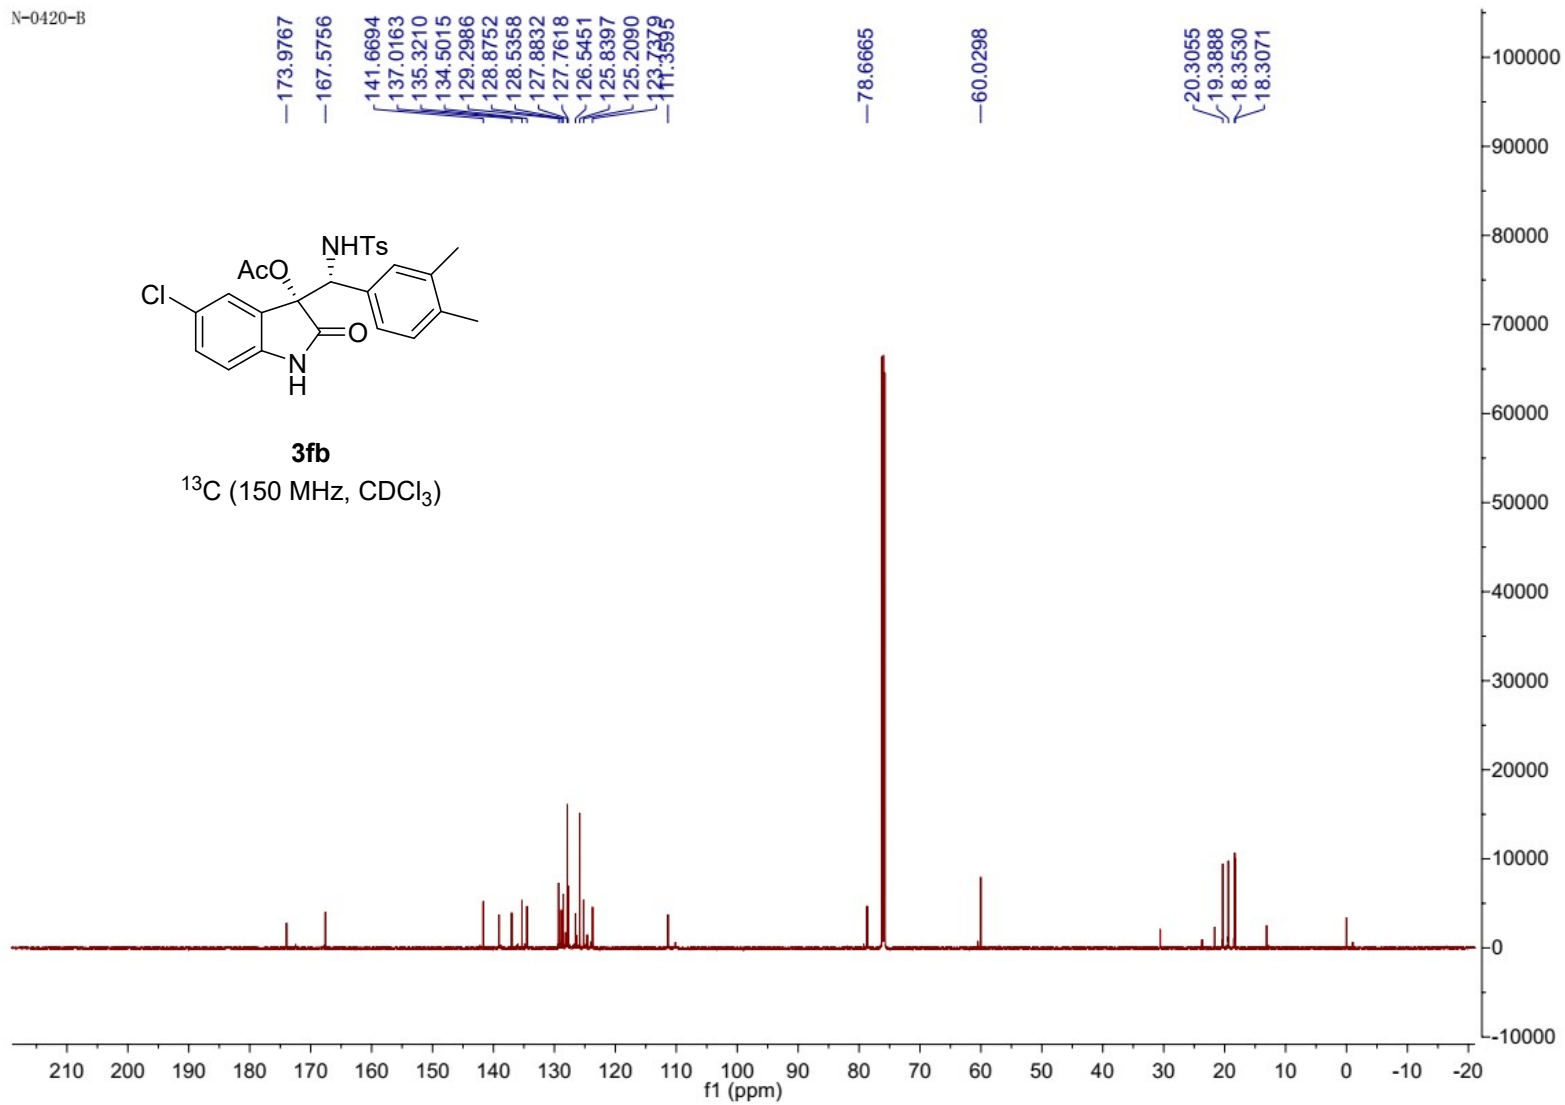

N-0420-C

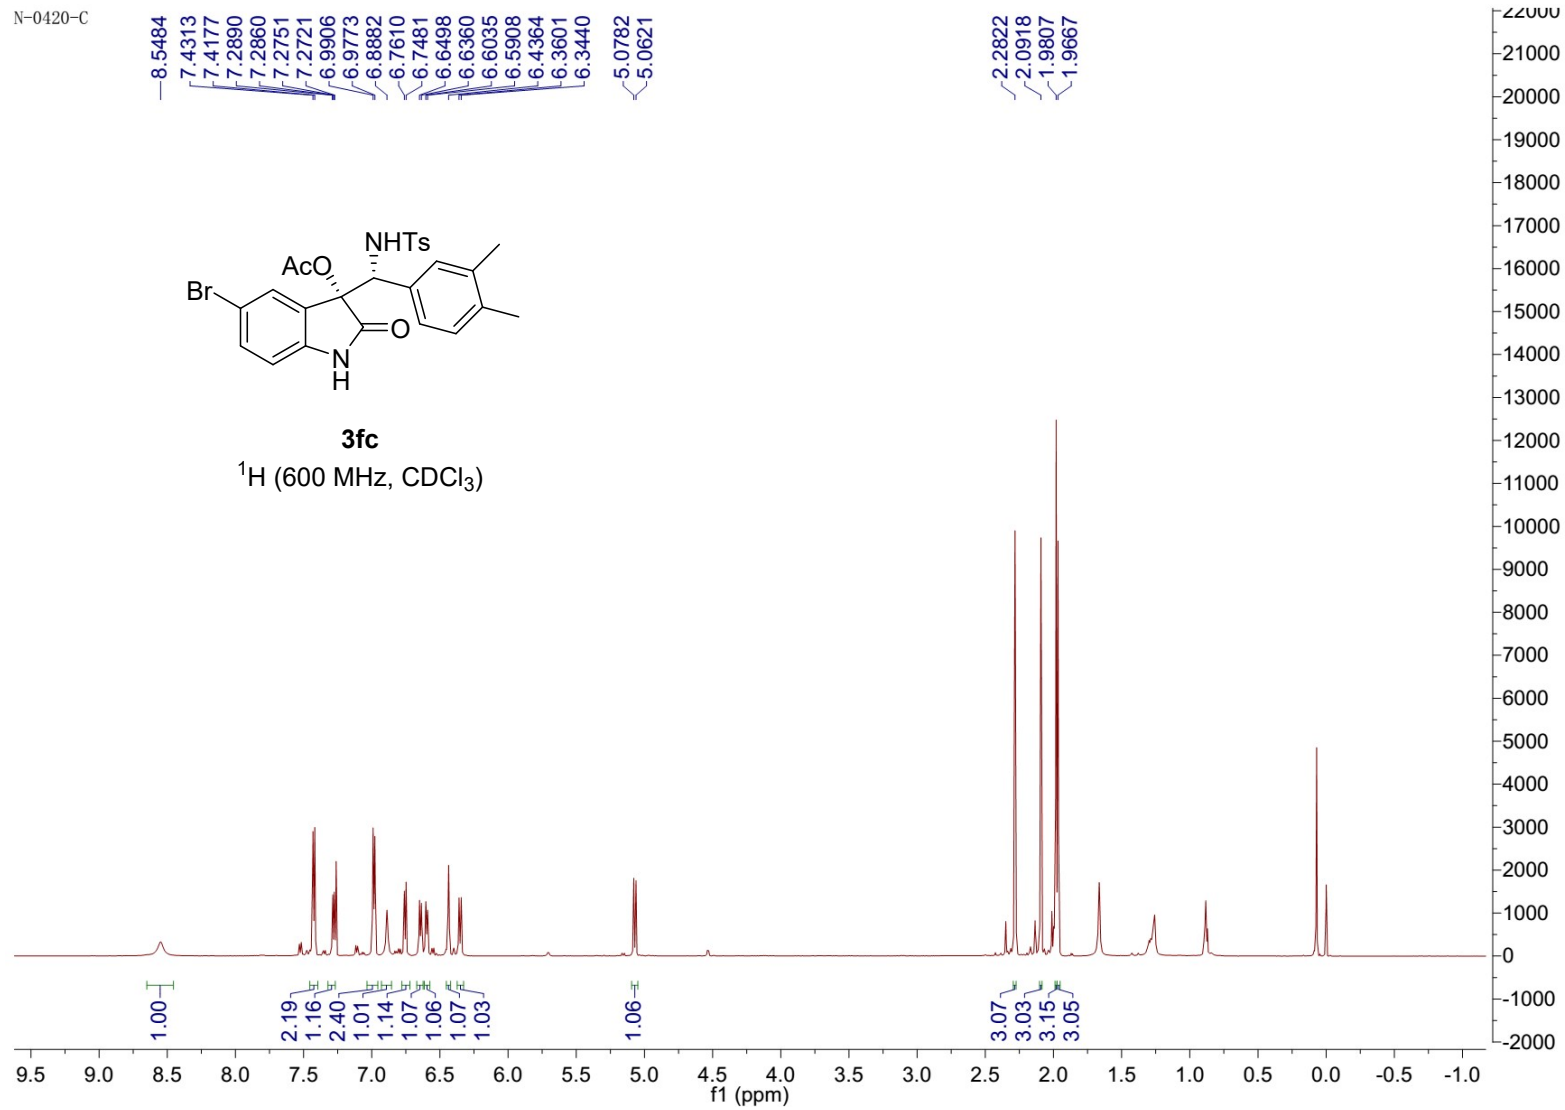

N-0420-C

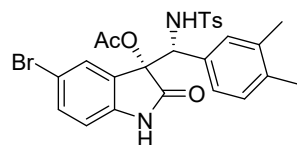

**3fc**

$^{13}\text{C}$  (150 MHz,  $\text{CDCl}_3$ )

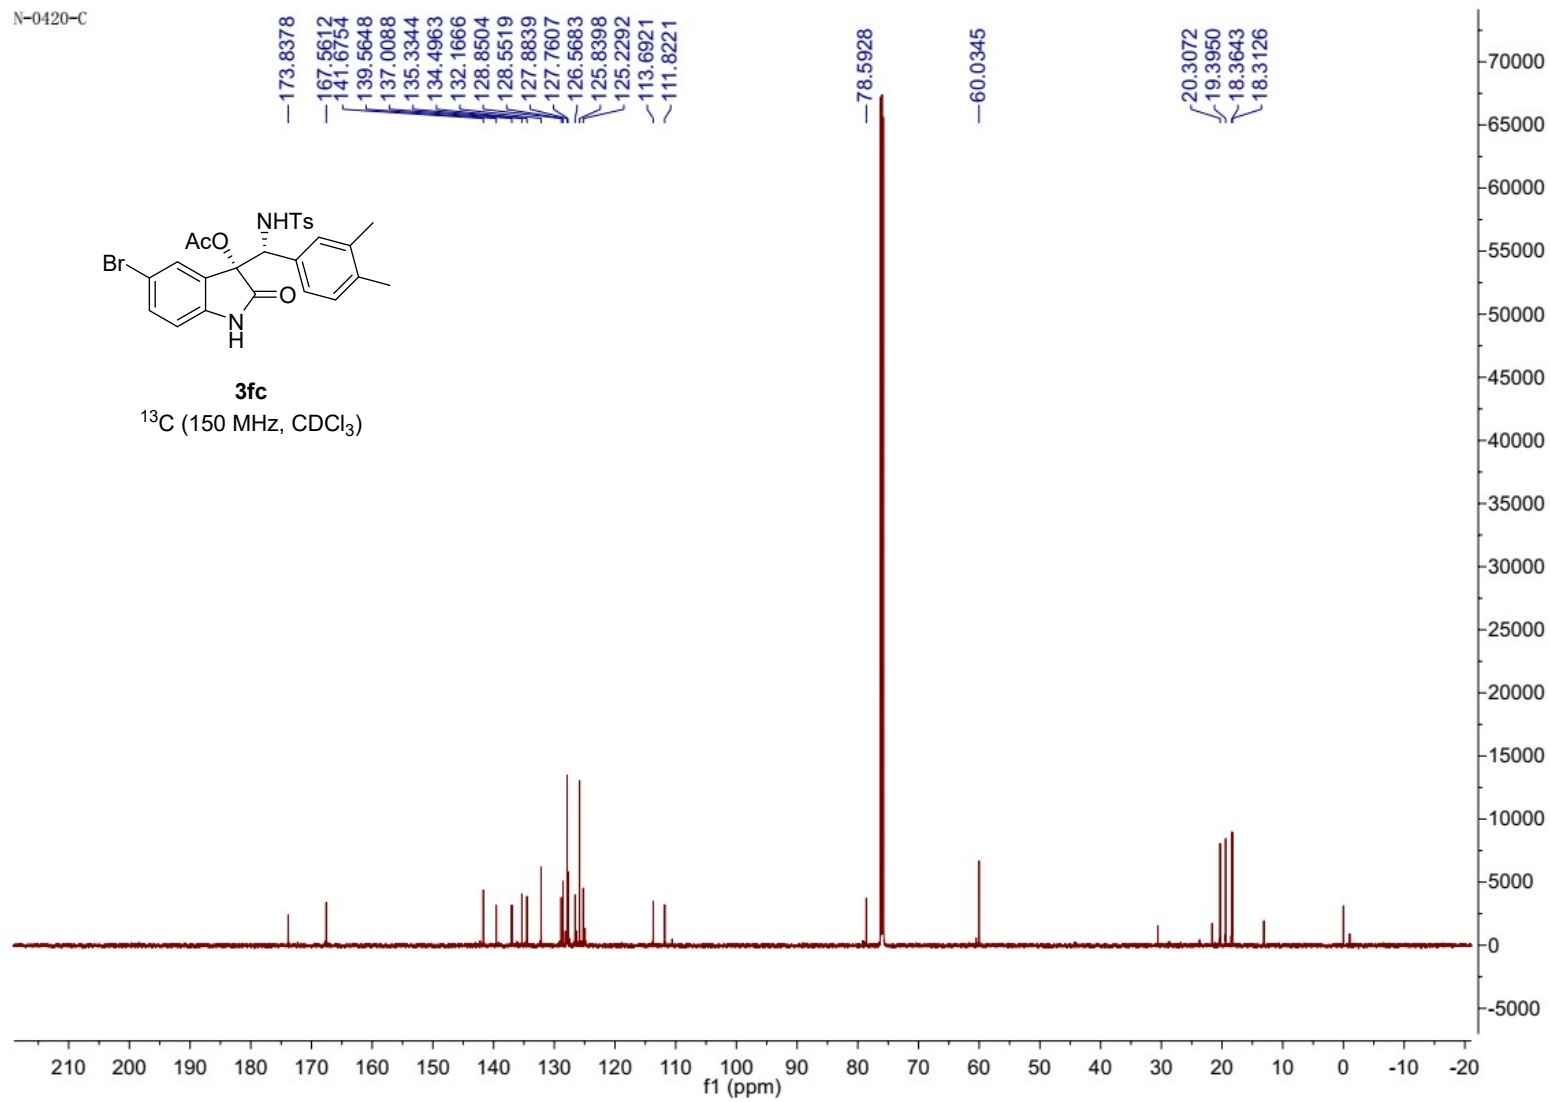

0310A

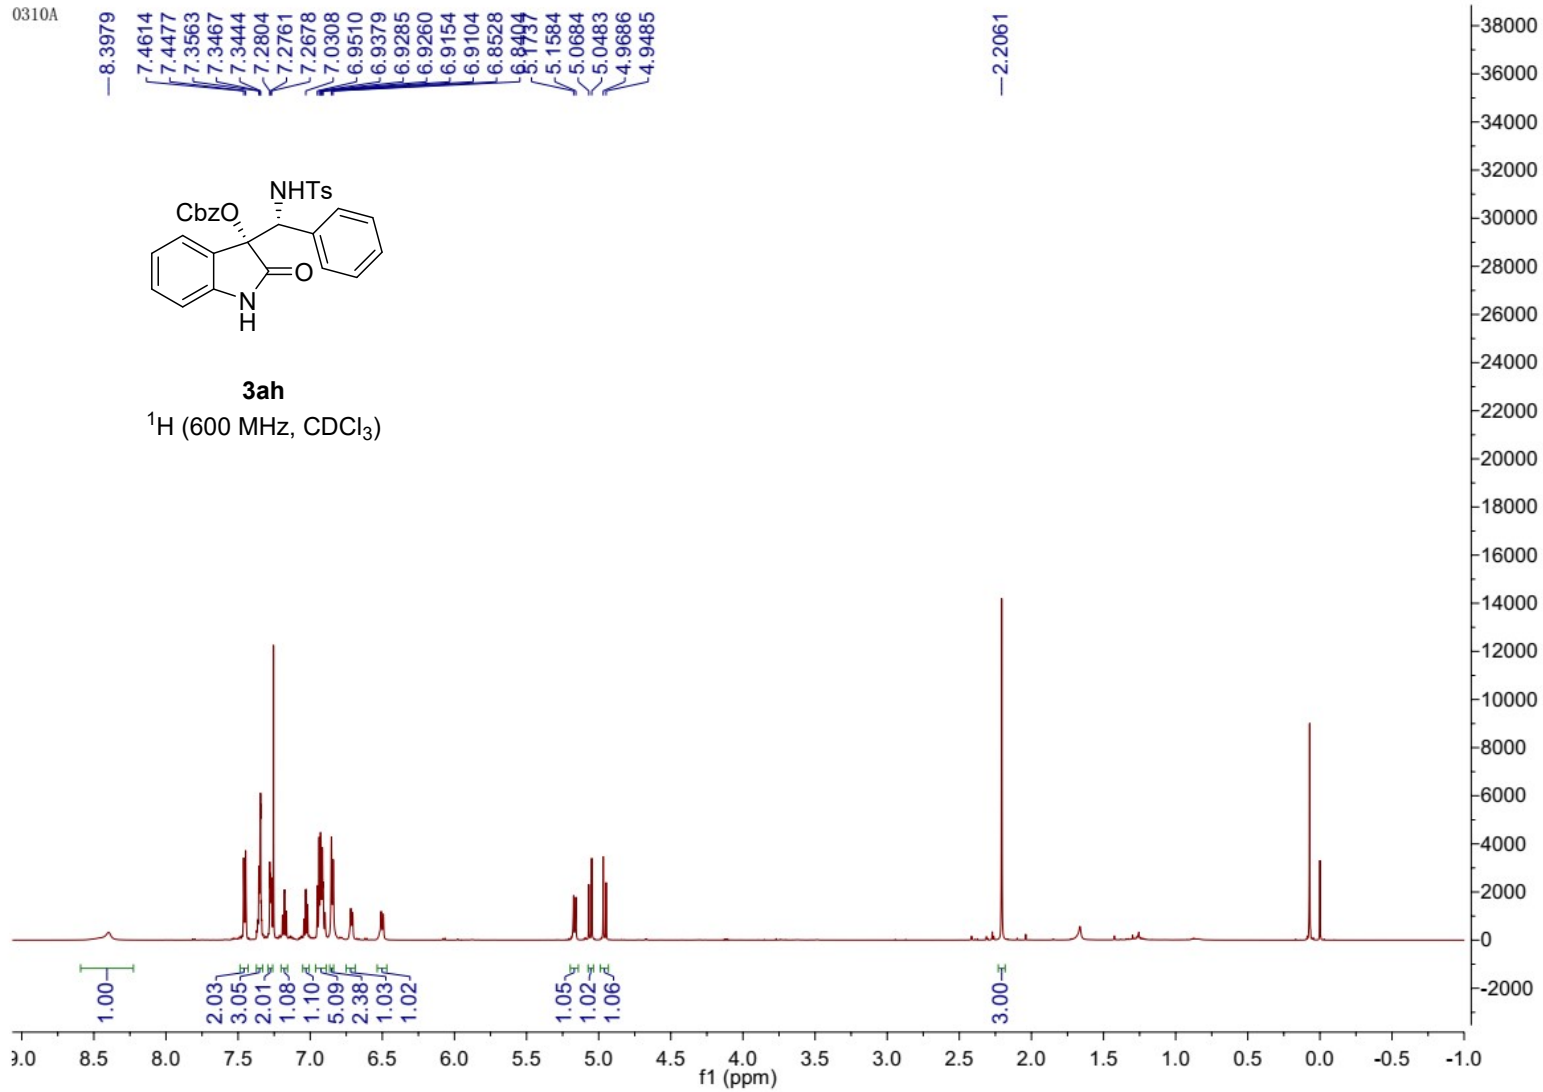

0310A

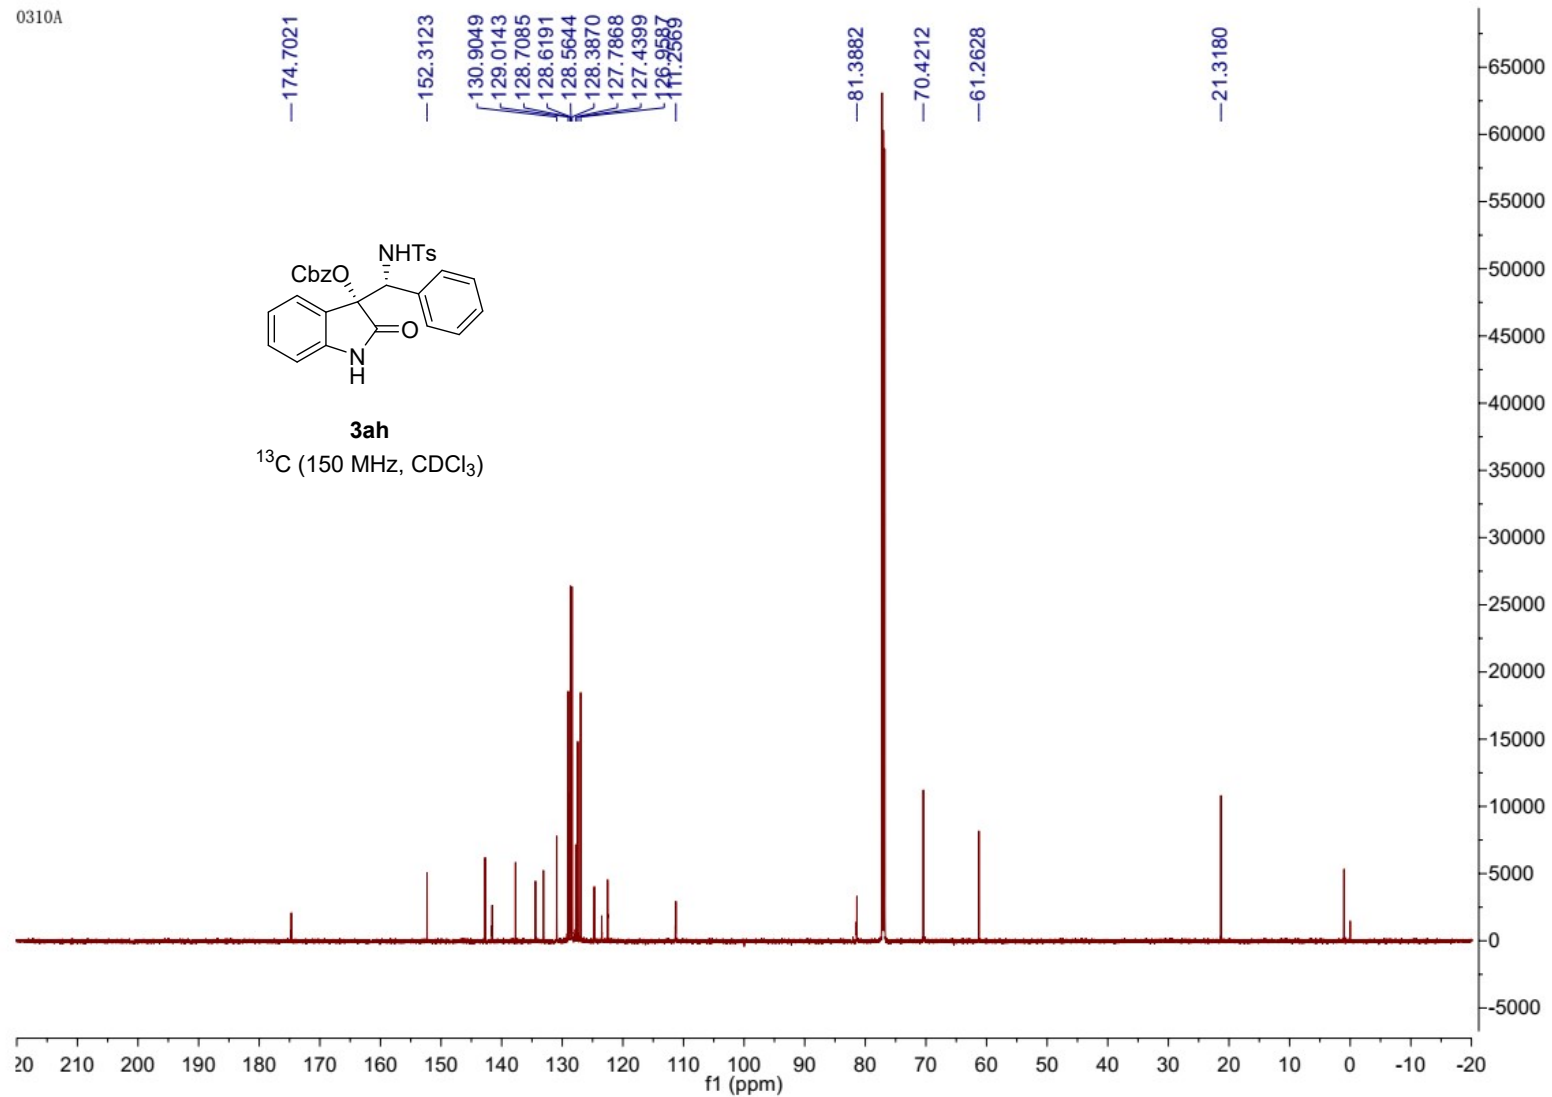

BJSZ

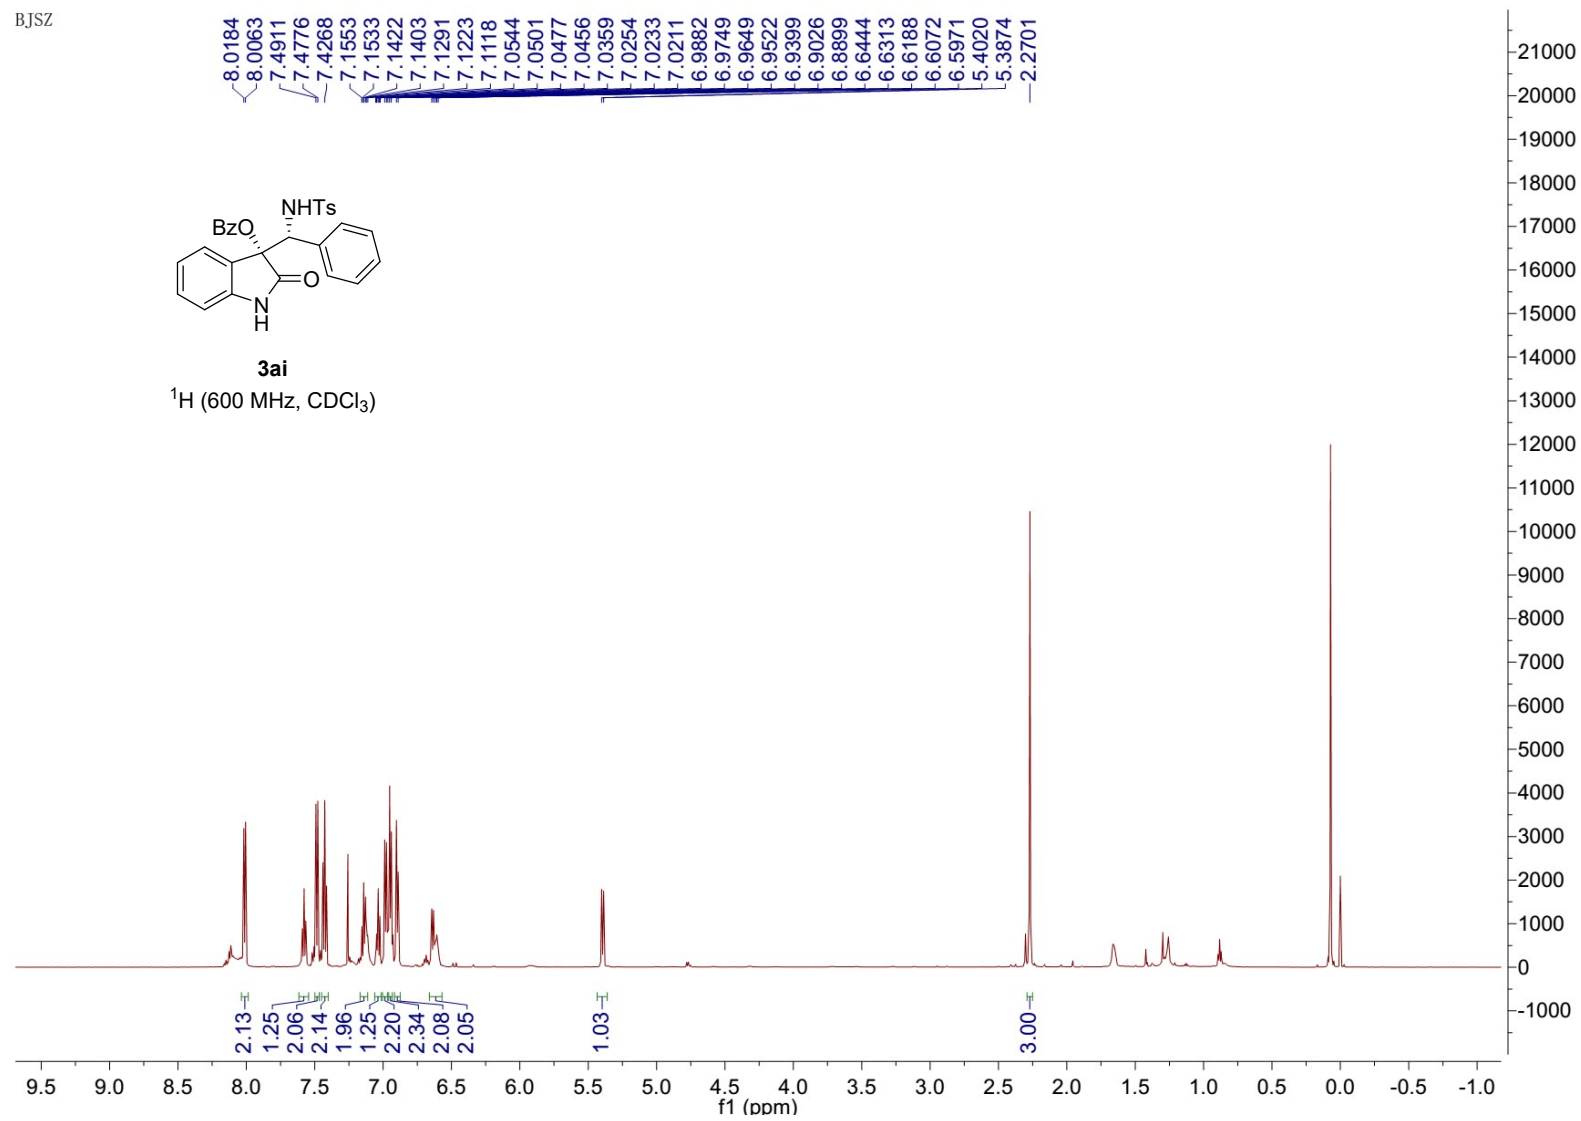



BJSZ

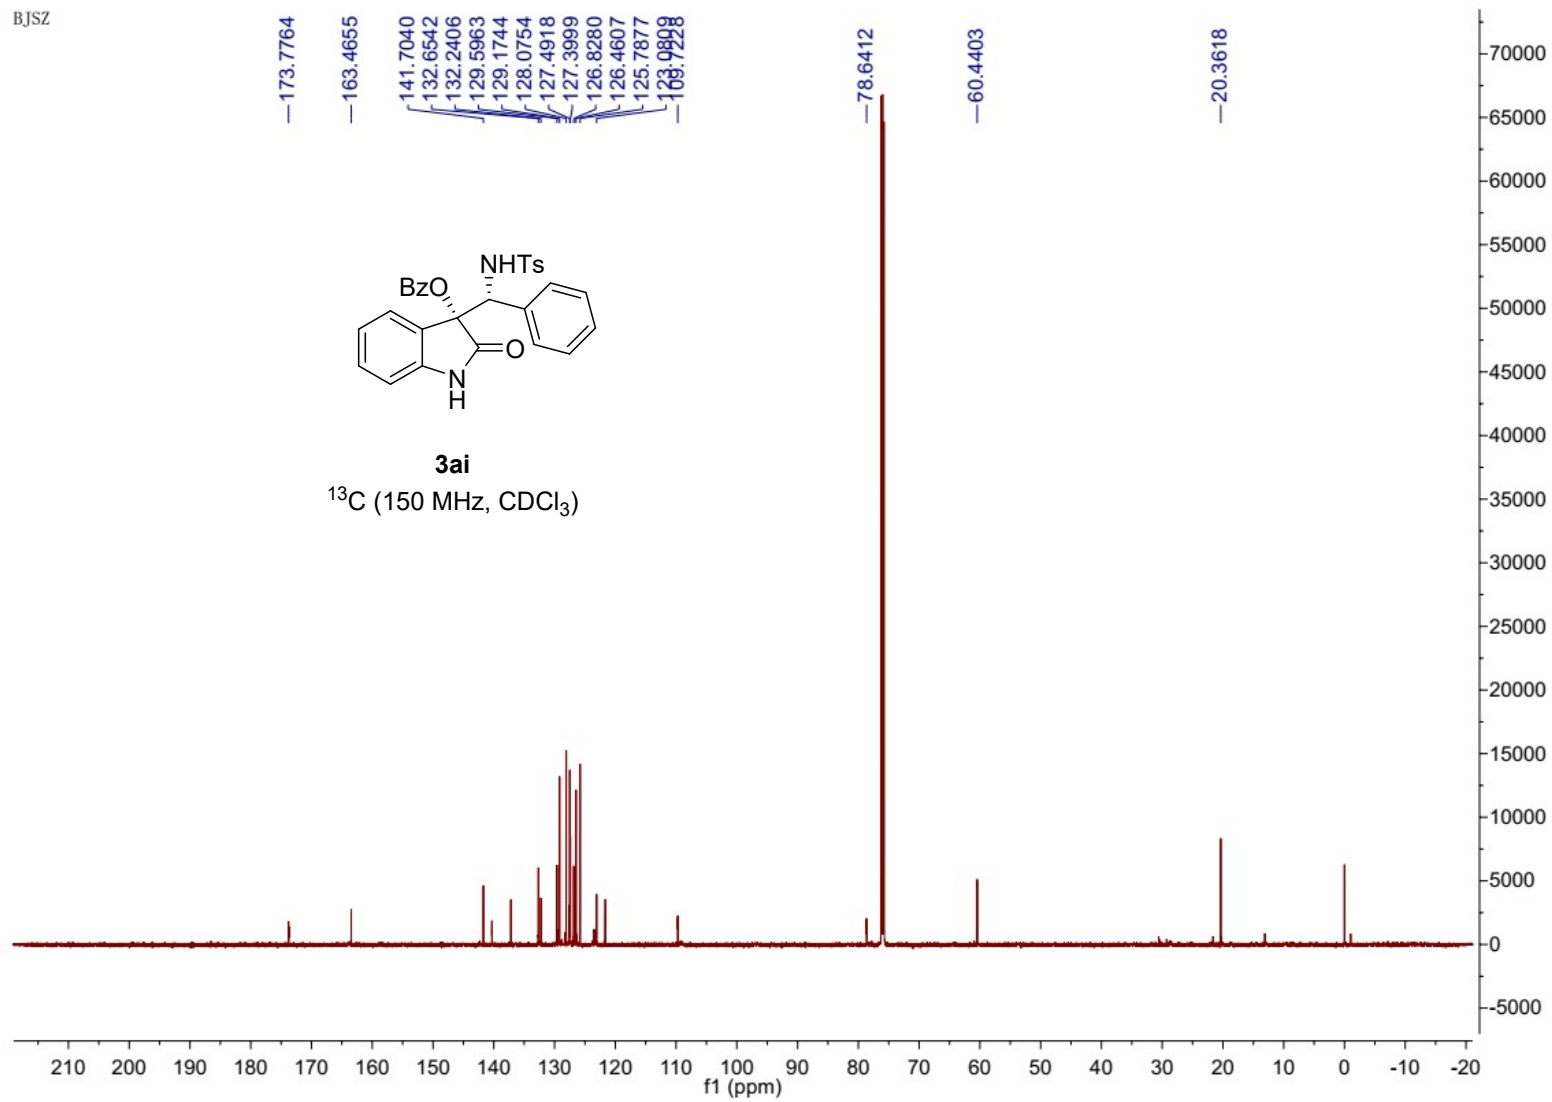

MOVEAC

7.7072  
7.4741  
7.4604  
7.4194  
7.4071  
7.1200  
7.1085  
7.0958  
7.0457  
7.0331  
7.0204  
6.9433  
6.9413  
6.9346  
6.9294  
6.9209  
6.9167  
6.9146  
6.8519  
6.8390  
6.8328  
6.8265  
6.8158  
6.7549  
6.7424  
4.9532  
4.9359

—2.2260

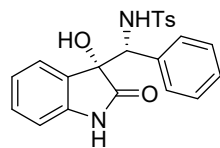

**4aa**

<sup>1</sup>H (600 MHz, CDCl<sub>3</sub>)

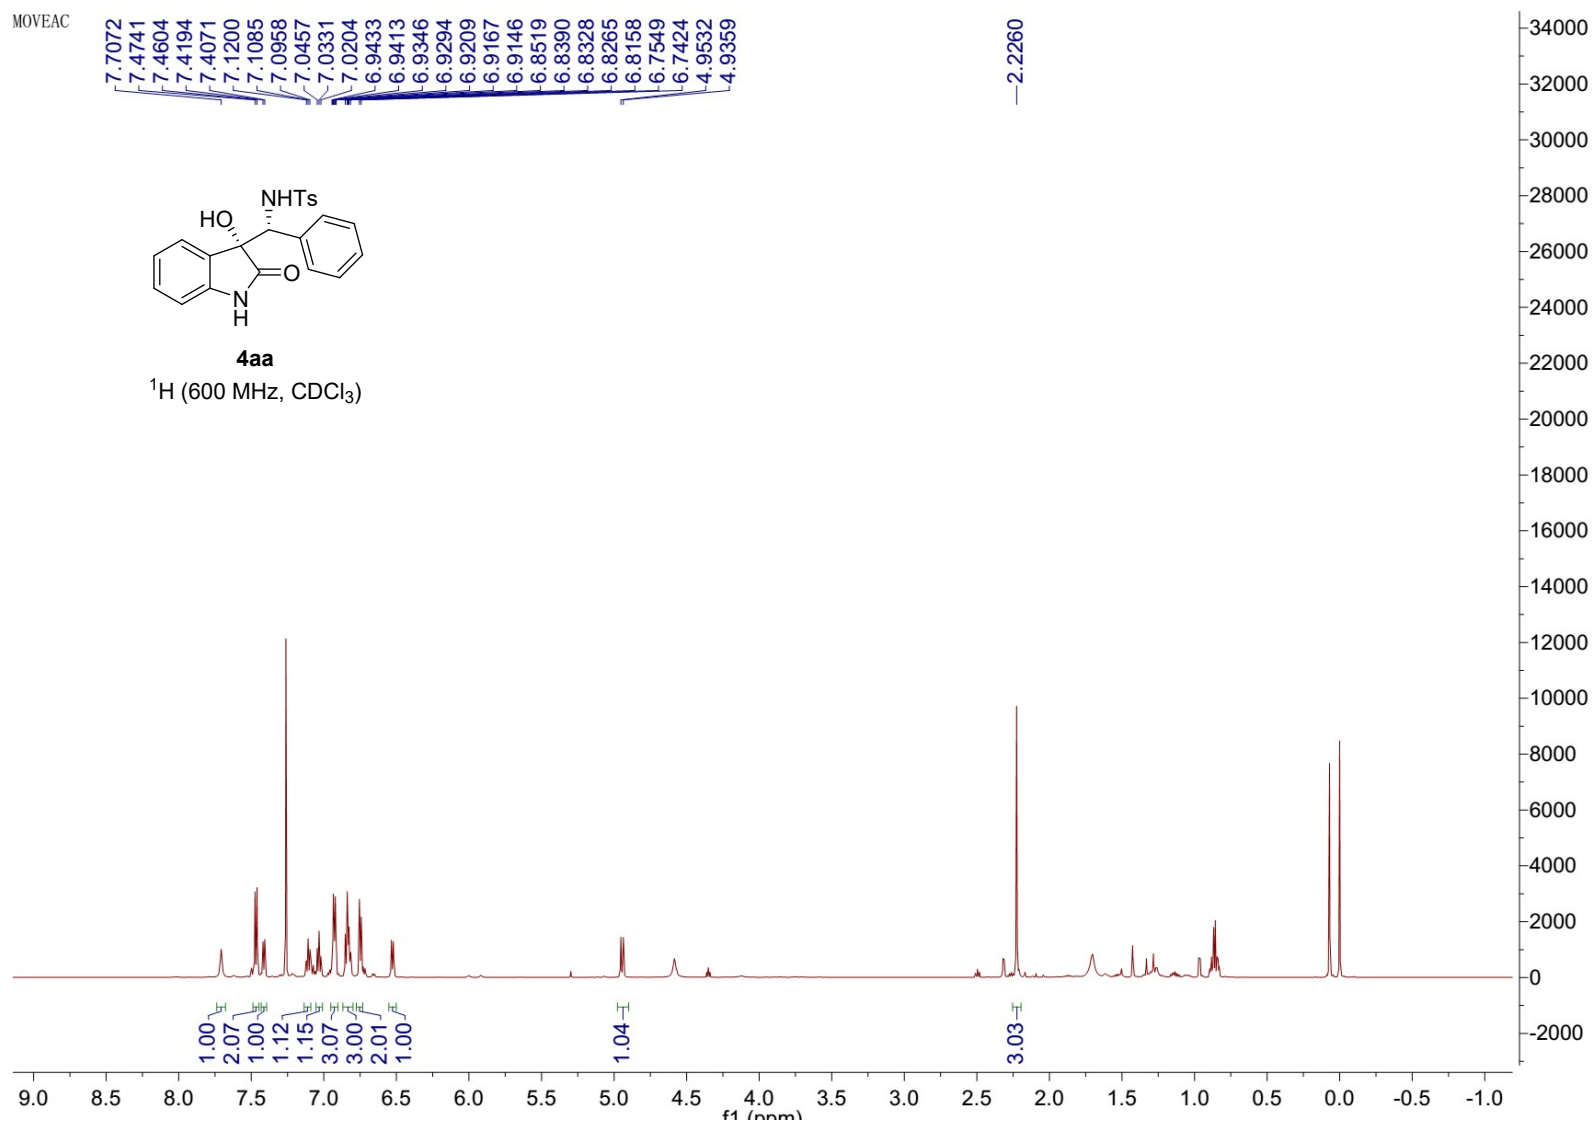

MOVEAC

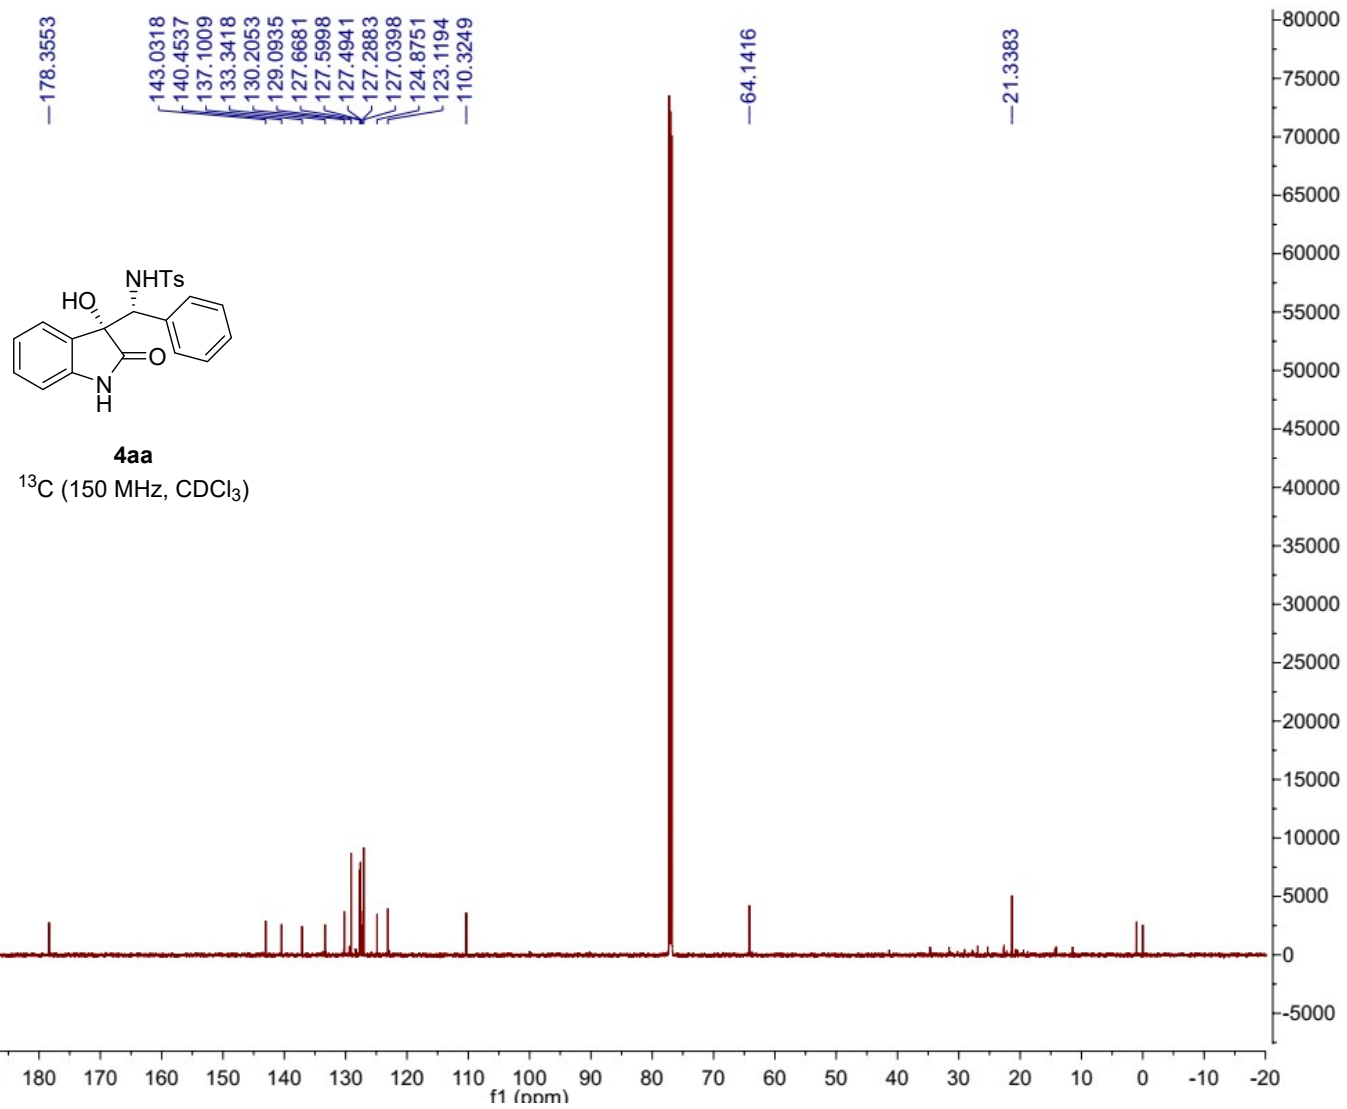

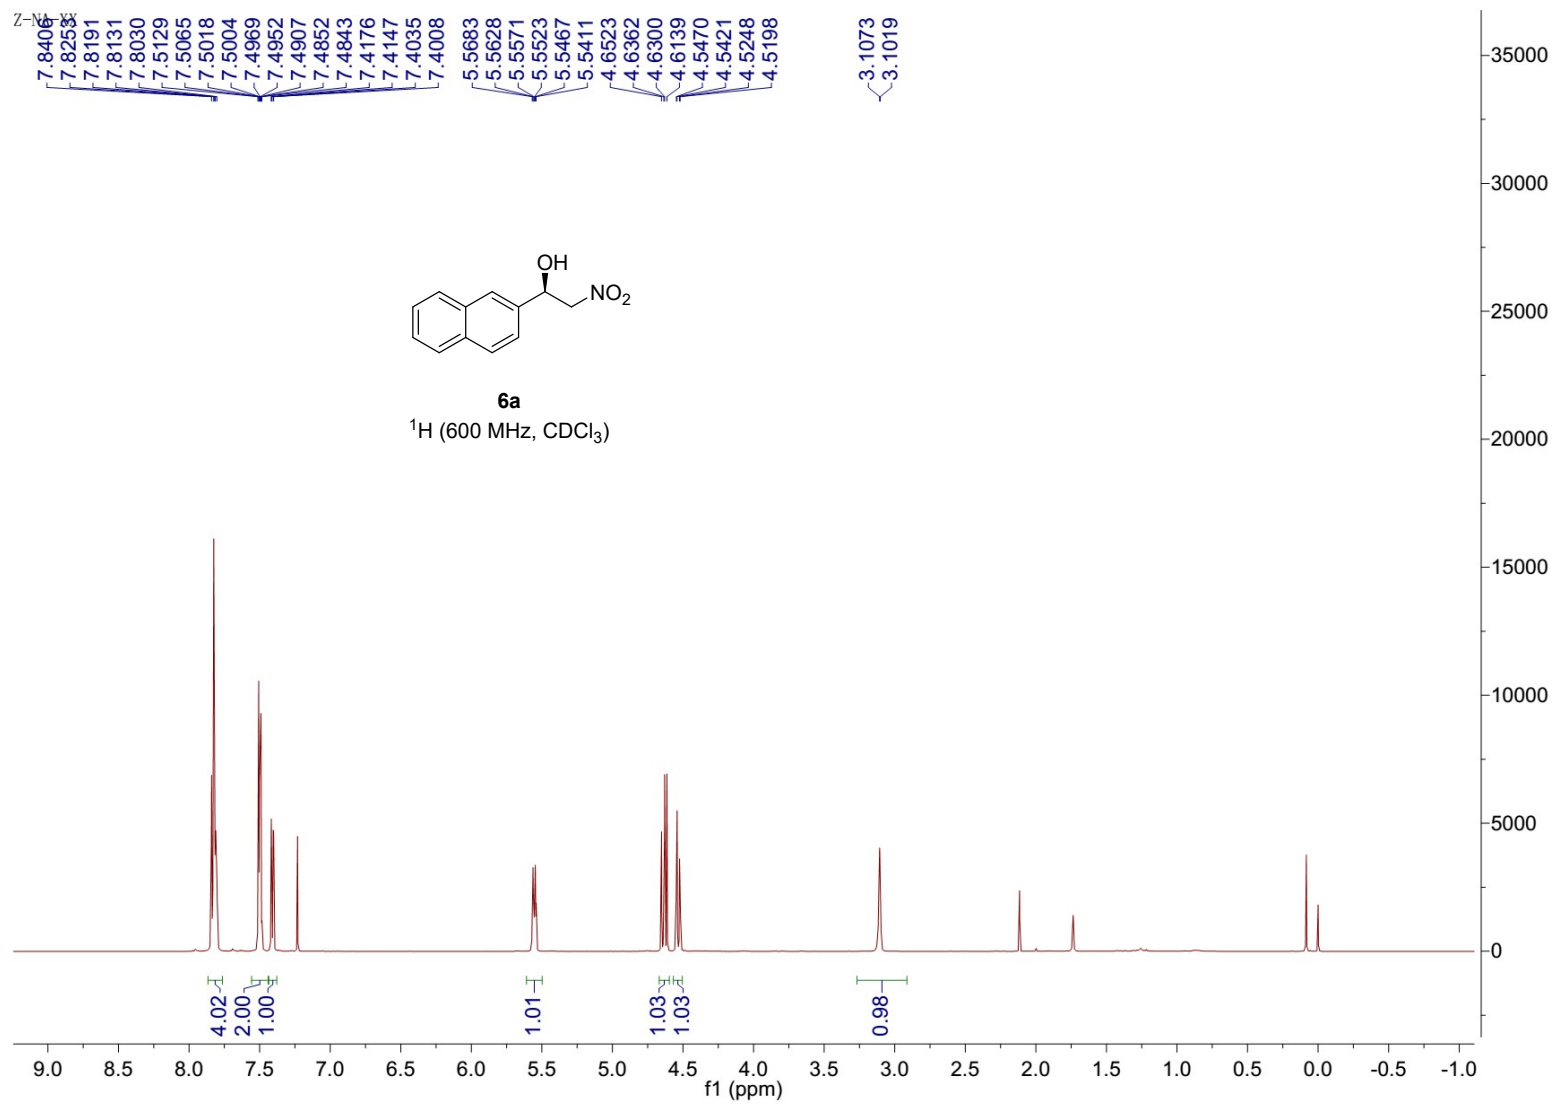

N-4ab

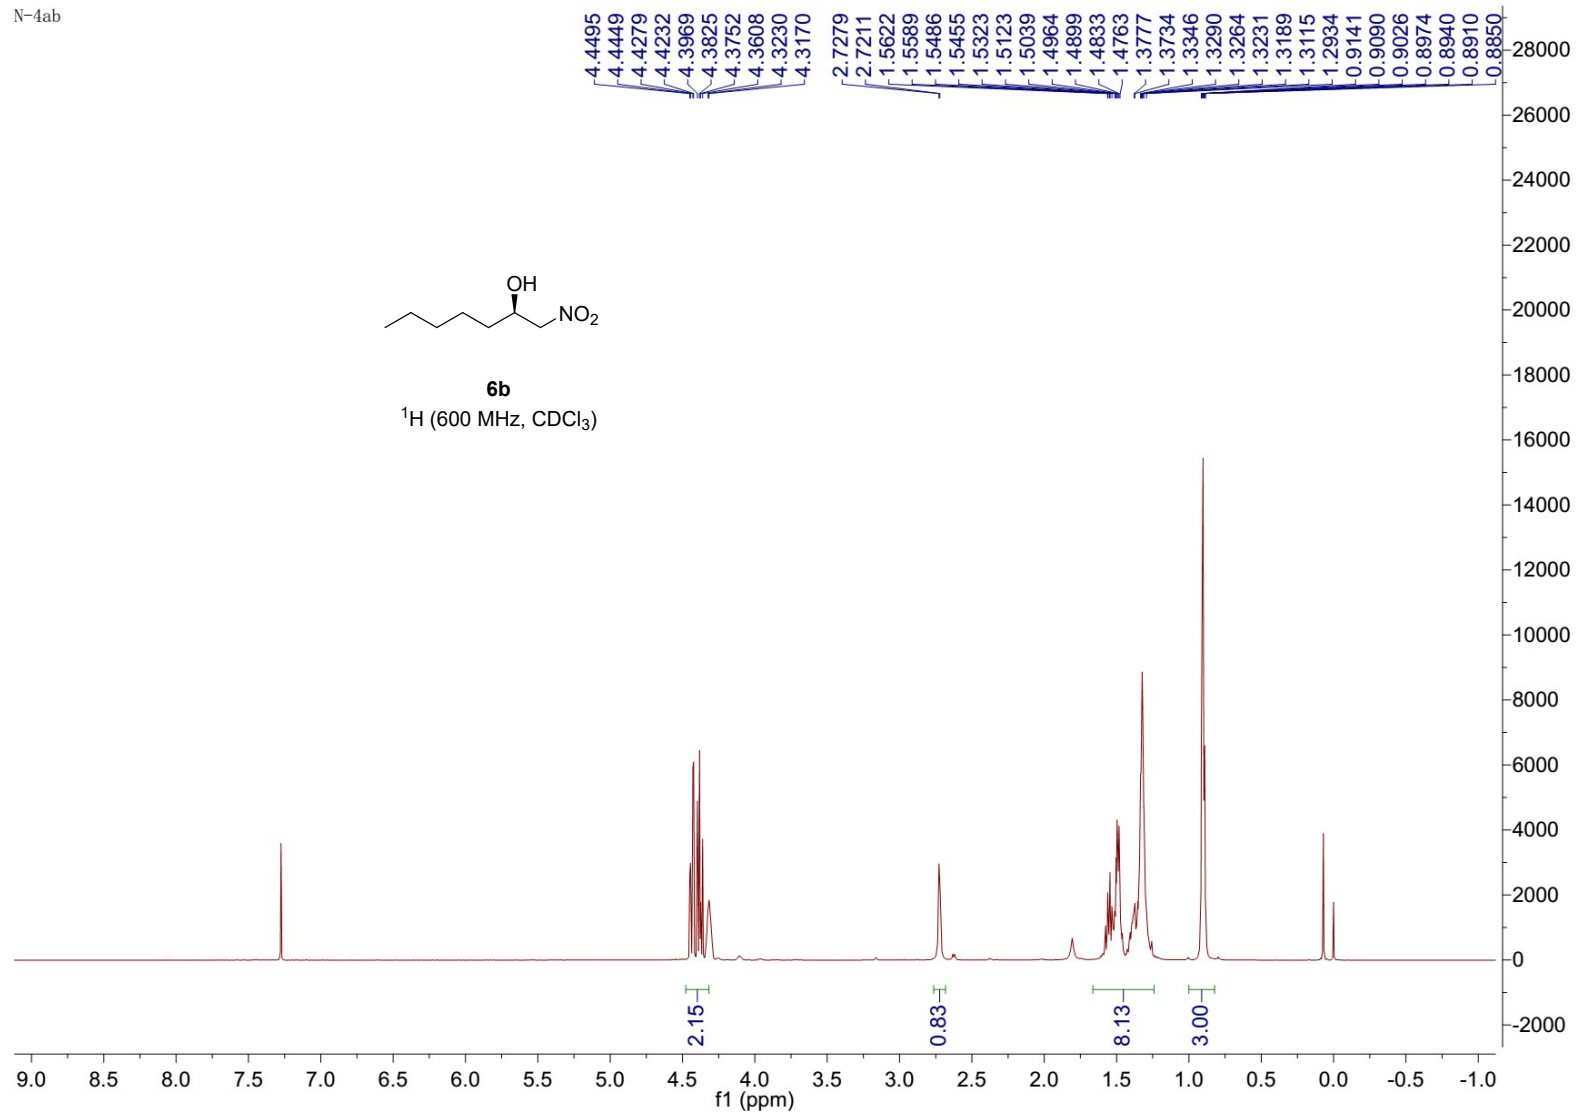

Supplement: d1ob01328a1.pdf [file d1ob01328a1.pdf]
